# Supplementary material for: From Mouse to Human: Evolutionary Genomics Analysis of Human Orthologs of Essential Genes
Source: PubMed Central journal article supplement (PMC3649967; doi:10.1371/journal.pgen.1003484), 2013-05-09

A)

Final 2472 EG - 2012-12-20 04:48 PM

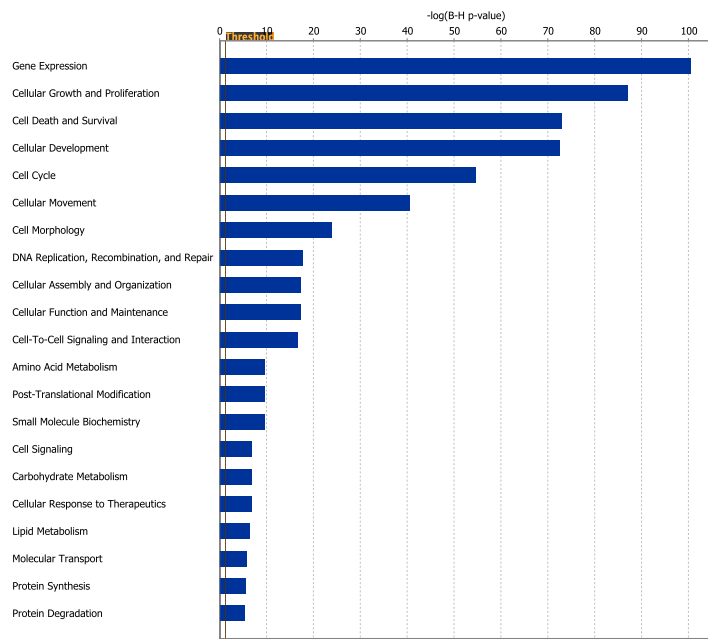

C)

Final 2472 EG - 2012-12-20 04:48 PM

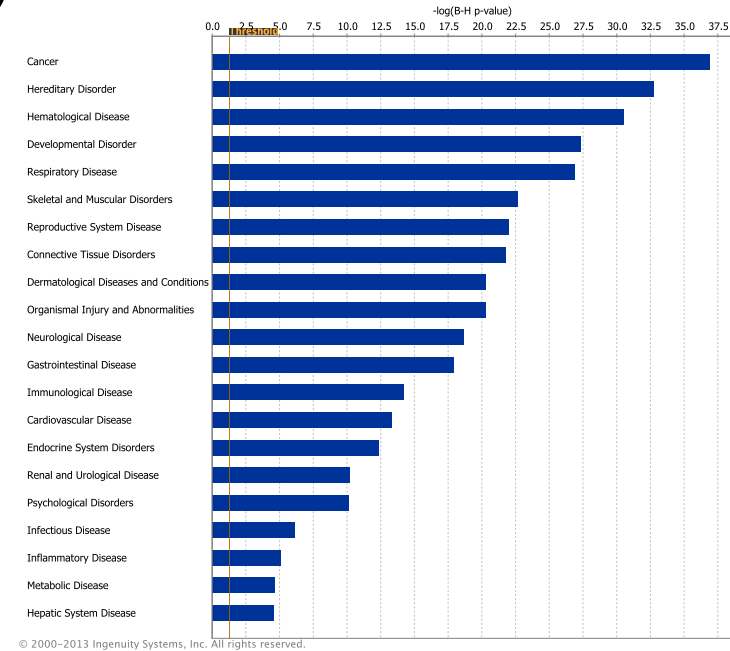

B)

Final 2472 EG - 2012-12-20 04:48 PM

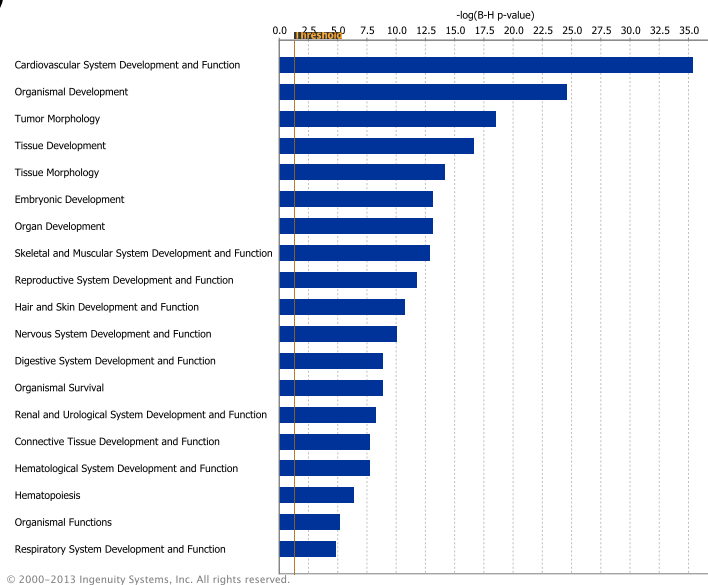

Supplement: pgen.1003484.s001.pdf [file pgen.1003484.s001.pdf]
