# Supplementary material for: From Mouse to Human: Evolutionary Genomics Analysis of Human Orthologs of Essential Genes
Source: PubMed Central journal article supplement (PMC3649967; doi:10.1371/journal.pgen.1003484), 2013-05-09

## 1421390\_at

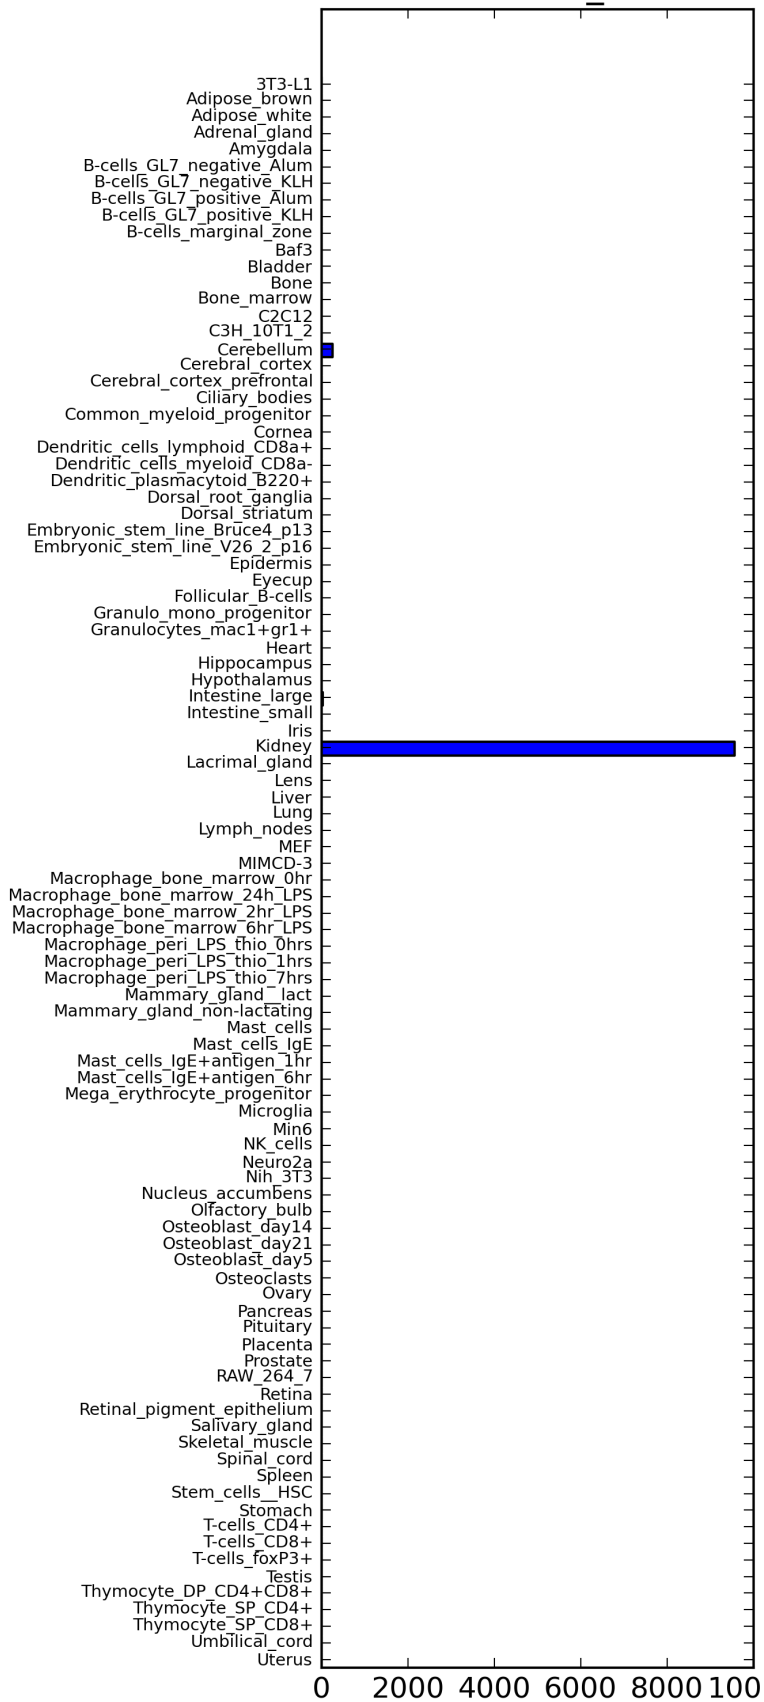

## 220281\_at

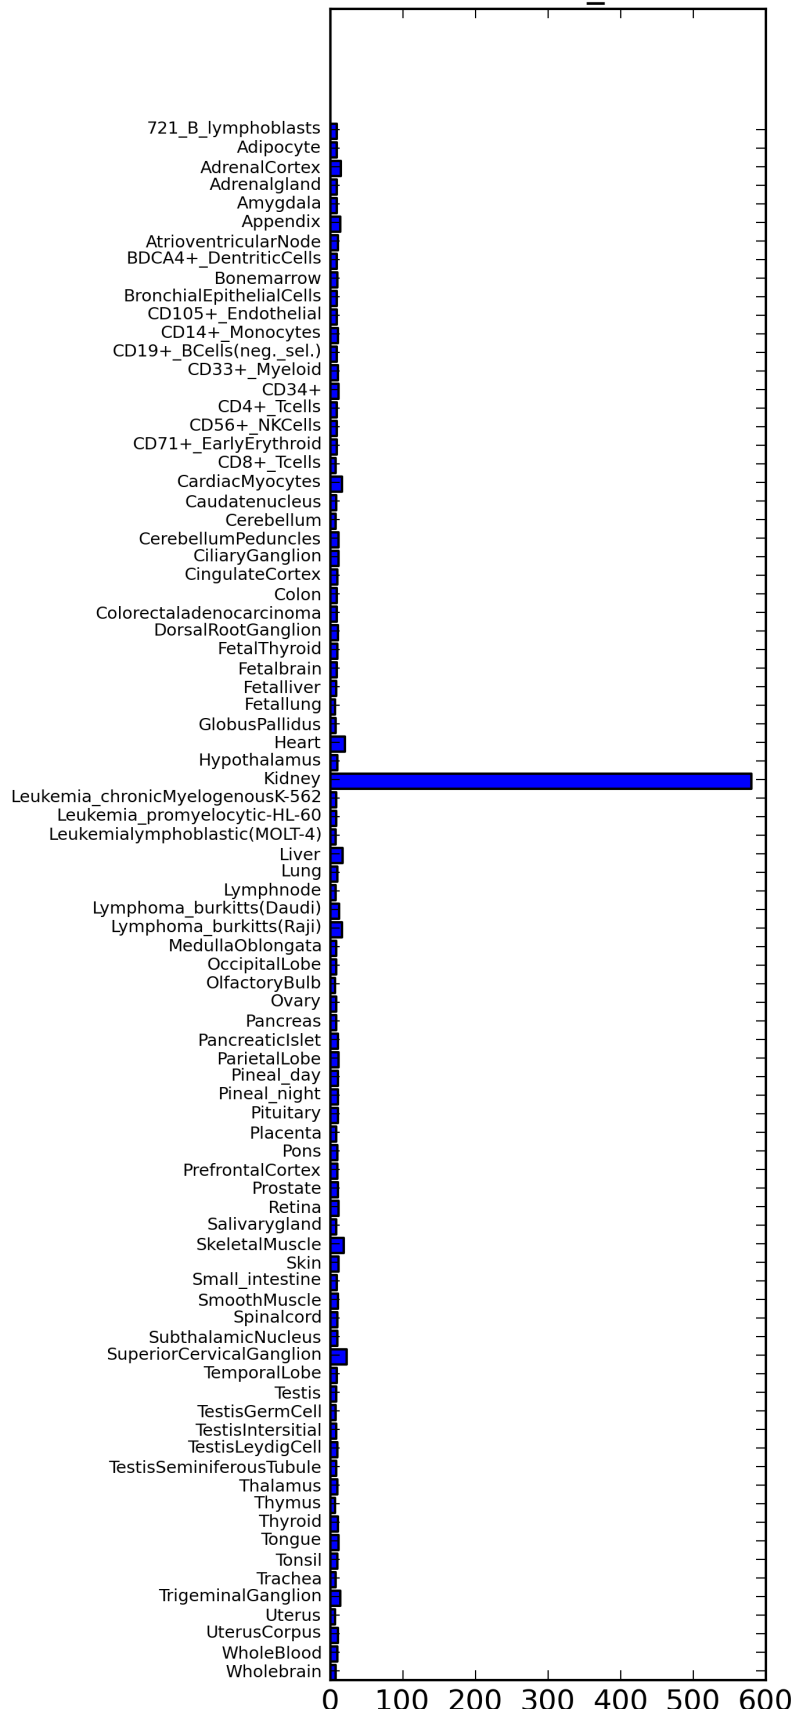

Supplement: pgen.1003484.s003.pdf [file pgen.1003484.s003.pdf]
