# Supplementary material for: From Mouse to Human: Evolutionary Genomics Analysis of Human Orthologs of Essential Genes
Source: PLOS journal article supplement (doi:10.1371/journal.pgen.1003484), 2013-05-09
Supplement: S22 (10.1371/journal.pgen.1003484.s022) [file journal.pgen.1003484.s022.xls]

## Sheet: Sheet1
Gene_symbol	Ensembl gene ID	Chrom	CDS_Begin	CDS_End	Essential	Non-essential	Overexpressed_in_the_brain	Exon_number	CDS_length	GC%
FAM138A	ENSG00000237613	1	34554	36081	N	N	N	3	258	50.26
OR4F5	ENSG00000186092	1	69091	70008	N	N	N	1	918	42.81
OR4F29	ENSG00000235249	1	367640	368634	N	N	N	1	939	45.73
OR4F16	ENSG00000185097	1	621059	622053	N	N	N	1	939	45.73
AL669831.1	ENSG00000197049	1	721320	722513	N	N	N	1	507	36.18
SAMD11	ENSG00000187634	1	860260	879955	N	N	N	14	2046	65.99
NOC2L	ENSG00000188976	1	879584	894689	N	N	N	19	2250	59.55
KLHL17	ENSG00000187961	1	895967	901095	N	N	N	12	1929	67.87
PLEKHN1	ENSG00000187583	1	901877	911245	N	N	N	15	1992	62.65
C1orf170	ENSG00000187642	1	910579	917497	N	N	N	5	2091	67.73
HES4	ENSG00000188290	1	934342	935552	N	N	N	3	744	74.32
ISG15	ENSG00000187608	1	948803	949920	N	Y	N	2	498	64.58
AGRN	ENSG00000188157	1	955503	991496	Y	N	N	36	6138	65.71
RNF223	ENSG00000237330	1	1007126	1009687	N	N	N	2	750	67.84
C1orf159	ENSG00000131591	1	1017198	1051741	N	N	N	11	1143	54.65
TTLL10	ENSG00000162571	1	1109264	1133315	N	N	N	16	2022	54.75
TNFRSF18	ENSG00000186891	1	1138888	1142071	N	Y	N	4	768	67.46
TNFRSF4	ENSG00000186827	1	1146706	1149518	N	Y	N	7	834	70.39
SDF4	ENSG00000078808	1	1152288	1167411	N	N	N	7	1089	61.35
B3GALT6	ENSG00000176022	1	1167629	1170421	N	N	N	1	990	64.2
FAM132A	ENSG00000184163	1	1177826	1182102	N	N	N	8	909	69.35
UBE2J2	ENSG00000160087	1	1189289	1209265	N	N	N	8	828	56.33
SCNN1D	ENSG00000162572	1	1214447	1227409	N	N	N	18	2409	64.86
ACAP3	ENSG00000131584	1	1227756	1244989	N	N	N	24	2505	67.3
PUSL1	ENSG00000169972	1	1243947	1247057	N	N	N	8	912	66.76
CPSF3L	ENSG00000127054	1	1246965	1260071	N	N	N	19	1821	60.46
GLTPD1	ENSG00000224051	1	1260136	1264277	N	N	N	3	645	65.26
TAS1R3	ENSG00000169962	1	1266694	1270686	N	Y	N	6	2559	66.74
DVL1	ENSG00000107404	1	1270656	1284730	N	Y	N	15	2088	66.24
MXRA8	ENSG00000162576	1	1288069	1297157	N	N	N	10	1353	65.3
AURKAIP1	ENSG00000175756	1	1309110	1310875	N	N	N	4	600	66.87
CCNL2	ENSG00000221978	1	1321091	1334708	N	N	N	11	1563	51.37
RP4-758J18.2	ENSG00000224870	1	1334902	1337426	N	N	N	3	414	59.37
MRPL20	ENSG00000242485	1	1337288	1342693	N	N	N	3	468	53.09
ANKRD65	ENSG00000235098	1	1353800	1357149	N	N	N	4	1200	66.51
TMEM88B	ENSG00000205116	1	1361508	1363167	N	N	N	2	492	70.6
VWA1	ENSG00000179403	1	1370241	1378262	N	Y	Y	3	1338	66.36
ATAD3C	ENSG00000215915	1	1385069	1405538	N	N	N	12	1236	56.98
ATAD3B	ENSG00000160072	1	1407143	1433228	N	N	N	16	1947	58.83
ATAD3A	ENSG00000197785	1	1447531	1470067	N	N	N	16	1905	59.87
TMEM240	ENSG00000205090	1	1470554	1475833	N	N	N	4	522	66.02
SSU72	ENSG00000160075	1	1477053	1510249	N	N	N	5	585	53.87
AL645728.1	ENSG00000215014	1	1510355	1511373	N	N	N	1	303	57.02
C1orf233	ENSG00000228594	1	1533392	1535476	N	N	N	1	681	70.31
MIB2	ENSG00000197530	1	1550795	1565990	N	Y	N	20	3213	66.41
MMP23B	ENSG00000189409	1	1567474	1570639	N	N	N	8	1173	70.47
CDK11B	ENSG00000248333	1	1570603	1590473	Y	N	N	21	2358	52.93
SLC35E2B	ENSG00000189339	1	1592939	1624167	N	N	Y	9	1218	53.64
CDK11A	ENSG00000008128	1	1634169	1655777	N	N	N	20	2352	51.99
SLC35E2	ENSG00000215790	1	1656277	1677431	N	N	N	6	801	52.17
NADK	ENSG00000008130	1	1682671	1711896	N	N	N	14	1776	53.7
GNB1	ENSG00000078369	1	1716725	1822502	Y	N	Y	12	1023	46.69
CALML6	ENSG00000169885	1	1846266	1848735	N	N	N	6	546	63.04
TMEM52	ENSG00000178821	1	1849029	1850712	N	N	N	5	630	67.46
C1orf222	ENSG00000142609	1	1853396	1935276	N	N	N	21	2604	55.66
GABRD	ENSG00000187730	1	1950780	1962192	Y	N	Y	9	1359	62.48
PRKCZ	ENSG00000067606	1	1981909	2116834	N	Y	Y	18	1779	56.44
C1orf86	ENSG00000162585	1	2115903	2144159	N	N	N	5	852	60.96
AL590822.1	ENSG00000203301	1	2143360	2145620	N	N	N	1	654	63.87
SKI	ENSG00000157933	1	2160134	2241558	Y	N	N	7	2187	57.48
MORN1	ENSG00000116151	1	2252692	2323146	N	N	N	14	1494	57.29
RER1	ENSG00000157916	1	2323267	2335190	N	Y	N	7	591	53.81
PEX10	ENSG00000157911	1	2336236	2345236	N	N	N	6	1041	62.25
PLCH2	ENSG00000149527	1	2398898	2436969	N	Y	N	22	4251	64.91
PANK4	ENSG00000157881	1	2439972	2458039	N	N	N	19	2322	60.71
HES5	ENSG00000197921	1	2460184	2461684	N	Y	N	3	501	68.29
TNFRSF14	ENSG00000157873	1	2487078	2497061	N	Y	N	8	852	63.73
FAM213B	ENSG00000157870	1	2517930	2522908	N	N	N	7	696	64.59
MMEL1	ENSG00000142606	1	2522078	2564481	N	Y	N	24	2340	54.95
TTC34	ENSG00000215912	1	2567415	2718286	N	N	N	7	1701	59.03
ACTRT2	ENSG00000169717	1	2938046	2939465	N	N	N	1	1134	61.55
PRDM16	ENSG00000142611	1	2985732	3355185	Y	N	N	18	3831	57.58
ARHGEF16	ENSG00000130762	1	3370990	3397677	N	N	N	15	2130	63.08
MEGF6	ENSG00000162591	1	3406484	3528059	N	N	N	37	4626	62.62
TPRG1L	ENSG00000158109	1	3541566	3546691	N	N	N	5	819	52.22
WRAP73	ENSG00000116213	1	3547331	3569325	N	N	N	12	1383	55.25
TP73	ENSG00000078900	1	3569084	3652765	Y	N	Y	14	1911	59.52
CCDC27	ENSG00000162592	1	3668962	3688208	N	N	N	12	1971	53.9
RP1-286D6.2	ENSG00000235169	1	3689352	3692546	N	N	N	4	237	64.91
LRRC47	ENSG00000130764	1	3696784	3713068	N	N	Y	7	1752	54.46
CEP104	ENSG00000116198	1	3728645	3773778	N	N	N	22	2778	47.92
DFFB	ENSG00000169598	1	3773845	3801993	N	Y	N	7	1017	51.66
C1orf174	ENSG00000198912	1	3805689	3816857	N	N	N	4	732	49.32
AJAP1	ENSG00000196581	1	4714792	4843850	N	N	N	6	1236	52.75
NPHP4	ENSG00000131697	1	5922871	6052533	N	Y	N	30	4281	49.94
KCNAB2	ENSG00000069424	1	6051526	6161253	N	Y	Y	16	1248	56.05
CHD5	ENSG00000116254	1	6161853	6240183	N	N	Y	42	5865	56.7
RPL22	ENSG00000116251	1	6241329	6269449	N	Y	Y	4	387	50.61
RNF207	ENSG00000158286	1	6265535	6281359	N	N	N	18	1905	57.32
ICMT	ENSG00000116237	1	6281252	6296032	Y	N	N	5	855	49.59
HES3	ENSG00000173673	1	6304252	6305638	N	Y	N	4	561	65.97
GPR153	ENSG00000158292	1	6307406	6321035	N	N	Y	6	1830	60.31
ACOT7	ENSG00000097021	1	6324333	6454451	N	N	Y	9	1143	54
HES2	ENSG00000069812	1	6472478	6484730	N	N	N	4	522	57.51
ESPN	ENSG00000187017	1	6484848	6521430	N	Y	N	13	2565	60.14
TNFRSF25	ENSG00000215788	1	6521211	6526255	N	Y	N	10	1281	59.7
PLEKHG5	ENSG00000171680	1	6526152	6580121	N	Y	N	22	3258	58.85
NOL9	ENSG00000162408	1	6581407	6614595	N	N	N	12	2109	47.78
TAS1R1	ENSG00000173662	1	6615241	6639817	N	Y	N	6	2526	52.51
ZBTB48	ENSG00000204859	1	6640061	6649340	N	N	N	11	2067	57.78
KLHL21	ENSG00000162413	1	6650784	6674667	N	N	N	4	1794	54.46
PHF13	ENSG00000116273	1	6673745	6684093	N	N	N	4	903	54.99
THAP3	ENSG00000041988	1	6684926	6695646	N	N	N	6	720	56.77
DNAJC11	ENSG00000007923	1	6694228	6761984	N	N	N	16	1680	46.6
CAMTA1	ENSG00000171735	1	6845384	7827916	N	N	N	23	5022	48.03
VAMP3	ENSG00000049245	1	7831329	7841492	N	Y	N	5	303	42.77
PER3	ENSG00000049246	1	7844380	7905237	N	Y	N	21	3633	40.53
UTS2	ENSG00000049247	1	7903143	7913572	N	N	N	7	420	40.81
TNFRSF9	ENSG00000049249	1	7979907	8000926	N	Y	N	8	768	43.31
PARK7	ENSG00000116288	1	8014351	8045565	N	Y	N	7	570	45.41
ERRFI1	ENSG00000116285	1	8064464	8086368	Y	N	N	4	1389	42.8
SLC45A1	ENSG00000162426	1	8377886	8404227	N	N	N	9	2349	52.36
RERE	ENSG00000142599	1	8412457	8877702	Y	N	N	23	4701	41.9
ENO1	ENSG00000074800	1	8921061	8939308	Y	N	N	12	1305	50.23
CA6	ENSG00000131686	1	9005922	9035151	N	Y	N	8	942	48.06
SLC2A7	ENSG00000197241	1	9063359	9086404	N	N	N	12	1539	52.44
SLC2A5	ENSG00000142583	1	9095166	9148537	N	N	N	12	1506	47.92
GPR157	ENSG00000180758	1	9160364	9189229	N	N	N	4	1008	50.06
H6PD	ENSG00000049239	1	9294863	9331396	N	Y	N	5	2376	52.28
SPSB1	ENSG00000171621	1	9352939	9429591	N	N	N	3	822	54.29
SLC25A33	ENSG00000171612	1	9599541	9642831	N	N	N	7	966	45.58
TMEM201	ENSG00000188807	1	9648932	9674935	N	N	N	11	2001	59.37
PIK3CD	ENSG00000171608	1	9711790	9789172	N	Y	N	23	3207	51.33
C1orf200	ENSG00000179840	1	9712668	9714644	N	N	N	2	504	55.29
CLSTN1	ENSG00000171603	1	9789084	9884584	N	N	Y	19	2946	47.37
CTNNBIP1	ENSG00000178585	1	9908334	9970394	Y	N	N	6	246	51.39
LZIC	ENSG00000162441	1	9982171	10003465	N	N	N	8	636	43.89
NMNAT1	ENSG00000173614	1	10003486	10045559	N	N	N	5	840	46.13
RBP7	ENSG00000162444	1	10057264	10076078	N	Y	N	5	546	48.33
UBE4B	ENSG00000130939	1	10092890	10241297	Y	N	N	28	3909	44.12
KIF1B	ENSG00000054523	1	10270863	10441661	Y	N	Y	48	5472	41.99
PGD	ENSG00000142657	1	10458649	10480201	N	N	N	13	1452	47.69
APITD1	ENSG00000175279	1	10490159	10512210	N	N	N	5	495	47.92
APITD1-CORT	ENSG00000251503	1	10490159	10512210	N	N	N	5	495	47.92
CORT	ENSG00000241563	1	10509776	10511959	N	Y	N	2	468	47.16
DFFA	ENSG00000160049	1	10516579	10532583	N	Y	N	6	996	48.52
PEX14	ENSG00000142655	1	10532345	10690815	Y	N	Y	9	1134	45.03
CASZ1	ENSG00000130940	1	10696661	10856707	N	N	N	21	5280	56.73
C1orf127	ENSG00000175262	1	11006528	11042094	N	N	N	13	2472	52.15
TARDBP	ENSG00000120948	1	11072414	11085796	Y	N	N	6	1245	44.02
MASP2	ENSG00000009724	1	11086580	11107290	N	Y	N	11	2061	50.21
SRM	ENSG00000116649	1	11114641	11120081	N	N	N	8	909	59.88
EXOSC10	ENSG00000171824	1	11126675	11159938	N	N	N	25	2658	46.38
MTOR	ENSG00000198793	1	11166592	11322564	Y	N	N	58	7650	44.54
ANGPTL7	ENSG00000171819	1	11249398	11256038	N	N	Y	5	1041	46.39
UBIAD1	ENSG00000120942	1	11333263	11356106	N	N	N	2	1017	48.21
PTCHD2	ENSG00000204624	1	11539223	11597641	N	N	N	21	4179	52.85
FBXO2	ENSG00000116661	1	11708424	11715842	N	Y	Y	6	891	61.17
FBXO44	ENSG00000132879	1	11714432	11723384	N	N	Y	6	771	54.94
FBXO6	ENSG00000116663	1	11724181	11734411	N	N	N	6	882	55.28
MAD2L2	ENSG00000116670	1	11734538	11751707	N	N	N	9	675	53.91
C1orf187	ENSG00000162490	1	11751786	11785914	N	Y	N	7	1050	53.39
AGTRAP	ENSG00000177674	1	11796141	11814859	N	N	N	5	480	54.37
C1orf167	ENSG00000215910	1	11821844	11849642	N	N	N	21	4422	55.19
MTHFR	ENSG00000177000	1	11845780	11866977	N	Y	N	12	2094	54.53
CLCN6	ENSG00000011021	1	11866207	11903201	N	Y	N	22	2862	47.77
NPPA	ENSG00000175206	1	11905766	11908402	N	Y	N	3	456	54.04
NPPB	ENSG00000120937	1	11917521	11918988	N	Y	N	3	405	54.43
KIAA2013	ENSG00000116685	1	11979648	11986485	N	N	N	2	2004	55.79
PLOD1	ENSG00000083444	1	11994262	12035599	N	Y	N	20	2325	53.54
MFN2	ENSG00000116688	1	12040238	12073571	Y	N	N	18	2274	51.12
MIIP	ENSG00000116691	1	12079523	12092102	N	N	N	10	1167	55.62
TNFRSF8	ENSG00000120949	1	12123434	12204264	N	Y	N	15	1788	50.55
TNFRSF1B	ENSG00000028137	1	12227060	12269285	N	Y	N	10	1386	55.39
VPS13D	ENSG00000048707	1	12290124	12572099	Y	N	Y	70	13167	42.33
DHRS3	ENSG00000162496	1	12627939	12677737	N	N	N	6	909	51.31
AADACL4	ENSG00000204518	1	12704566	12727097	N	N	N	4	1224	47.23
AADACL3	ENSG00000188984	1	12776118	12788726	N	N	N	4	1053	46.1
C1orf158	ENSG00000157330	1	12806163	12823847	N	N	N	4	585	43.88
PRAMEF12	ENSG00000116726	1	12834984	12838049	N	N	N	3	1452	53.2
PRAMEF1	ENSG00000116721	1	12851546	12856777	N	N	N	4	1425	46.5
PRAMEF11	ENSG00000204513	1	12884468	12891264	N	N	N	4	1311	47.99
HNRNPCL1	ENSG00000179172	1	12907261	12908578	N	N	N	2	882	46.13
PRAMEF2	ENSG00000120952	1	12916941	12921764	N	N	N	4	1425	47.14
PRAMEF4	ENSG00000243073	1	12939045	12946025	N	N	N	4	1437	48.17
PRAMEF10	ENSG00000187545	1	12952727	12958101	N	N	N	4	1425	47.87
PRAMEF7	ENSG00000204510	1	12976450	12980569	N	N	N	3	1425	49.85
PRAMEF6	ENSG00000232423	1	12998181	13117751	N	N	N	3	1431	45.87
PRAMEF22	ENSG00000204508	1	13035543	13038381	N	N	N	3	1446	51.46
WI2-3308P17.2	ENSG00000239810	1	13052394	13052998	N	N	N	1	273	46.94
WI2-2994D6.2	ENSG00000229571	1	13216356	13219581	N	N	N	2	1144	48.48
PRAMEF3	ENSG00000204503	1	13328196	13331692	N	N	N	3	1446	49.27
PRAMEF5	ENSG00000204502	1	13359819	13369057	N	N	N	4	1431	47.44
PRAMEF8	ENSG00000182330	1	13386646	13390765	N	N	N	4	1425	49.95
PRAMEF9	ENSG00000204501	1	13421176	13428191	N	N	N	4	1437	48.16
PRAMEF13	ENSG00000204495	1	13447414	13452656	N	N	N	4	1425	46.54
PRAMEF18	ENSG00000204491	1	13474053	13477569	N	N	N	3	1440	49.25
PRAMEF16	ENSG00000204488	1	13495254	13498260	N	N	N	3	1425	50.08
PRAMEF21	ENSG00000204486	1	13516066	13526943	N	N	N	4	1428	47.44
PRAMEF15	ENSG00000157358	1	13641973	13648988	N	N	N	4	1437	48.13
PRAMEF14	ENSG00000204481	1	13668269	13673511	N	N	N	4	1425	46.5
PRAMEF19	ENSG00000204480	1	13694889	13698405	N	N	N	3	1440	49.22
PRAMEF17	ENSG00000204479	1	13716088	13719064	N	N	N	3	1425	50.08
PRAMEF20	ENSG00000204478	1	13736907	13747803	N	N	N	4	1428	47.51
LRRC38	ENSG00000162494	1	13801445	13840543	N	N	N	2	885	50.15
PDPN	ENSG00000162493	1	13909960	13944452	Y	N	N	6	717	45.38
PRDM2	ENSG00000116731	1	14026693	14151560	N	Y	Y	10	5157	43.44
C1orf196	ENSG00000218328	1	14219052	14507087	N	N	N	2	279	43.09
KAZN	ENSG00000189337	1	14925200	15444539	N	N	Y	15	2328	49.01
TMEM51	ENSG00000171729	1	15479028	15546974	N	N	N	4	762	48.41
C1orf195	ENSG00000204464	1	15490840	15497813	N	N	N	2	381	43.36
FHAD1	ENSG00000142621	1	15573768	15726858	N	N	N	33	4362	47.42
EFHD2	ENSG00000142634	1	15736391	15756839	N	N	N	4	723	56.77
CTRC	ENSG00000162438	1	15764935	15775737	N	N	N	8	807	51.84
CELA2A	ENSG00000142615	1	15783223	15798586	N	N	N	8	810	48.28
CELA2B	ENSG00000215704	1	15792404	15817895	N	N	N	8	810	48.76
CASP9	ENSG00000132906	1	15817327	15853029	Y	N	N	8	1266	48.7
DNAJC16	ENSG00000116138	1	15853308	15918874	N	N	N	15	2349	44.67
AGMAT	ENSG00000116771	1	15898848	15911605	N	N	N	7	1059	49.63
DDI2	ENSG00000197312	1	15943995	15995539	N	N	N	10	1200	42.4
RSC1A1	ENSG00000215695	1	15986364	15988217	N	Y	N	1	1854	42.83
PLEKHM2	ENSG00000116786	1	16010827	16061264	N	N	Y	20	3060	52
SLC25A34	ENSG00000162461	1	16062900	16067891	N	N	N	5	915	58.85
TMEM82	ENSG00000162460	1	16068917	16074477	N	N	N	6	1032	58.89
FBLIM1	ENSG00000162458	1	16083102	16113089	N	N	N	6	1125	53.53
SPEN	ENSG00000065526	1	16174359	16266955	Y	N	N	15	10995	42.99
ZBTB17	ENSG00000116809	1	16268364	16302627	Y	N	N	16	2433	51.22
C1orf64	ENSG00000183888	1	16330731	16335302	N	N	N	2	510	52.32
HSPB7	ENSG00000173641	1	16340523	16346089	N	N	N	4	738	61.04
CLCNKA	ENSG00000186510	1	16345330	16360545	N	Y	N	20	2064	59.92
CLCNKB	ENSG00000184908	1	16370272	16383803	N	N	N	20	2064	59.27
FAM131C	ENSG00000185519	1	16384264	16400127	N	N	N	7	843	57.95
EPHA2	ENSG00000142627	1	16450832	16482582	N	Y	N	17	2931	57.33
ARHGEF19	ENSG00000142632	1	16524349	16539140	N	N	N	16	2409	57.36
ANO7L1	ENSG00000237276	1	16542404	16543823	N	N	N	3	304	55.14
C1orf134	ENSG00000204377	1	16555170	16556094	N	N	N	2	252	51.14
RSG1	ENSG00000132881	1	16555170	16563495	N	N	N	5	777	54.8
FBXO42	ENSG00000037637	1	16573334	16678949	N	N	N	10	2154	43.85
C1orf144	ENSG00000055070	1	16679070	16724640	N	N	N	4	477	48.1
SPATA21	ENSG00000187144	1	16713612	16763919	N	N	N	13	1410	50.37
NECAP2	ENSG00000157191	1	16767167	16786573	N	N	N	7	822	49.4
AL355149.1	ENSG00000197511	1	16862255	16864669	N	N	N	2	396	51.47
AL137798.1	ENSG00000237847	1	16999498	17000007	N	N	N	1	510	58.24
MST1P9	ENSG00000186715	1	17081405	17096732	N	N	N	16	2148	50.44
BX284668.1	ENSG00000196690	1	17196254	17198668	N	N	N	2	396	51.55
CROCC	ENSG00000058453	1	17222232	17299459	N	Y	N	37	6054	53.37
MFAP2	ENSG00000117122	1	17300997	17307330	N	Y	N	9	552	62.61
ATP13A2	ENSG00000159363	1	17312453	17338423	N	N	Y	29	3543	57.23
SDHB	ENSG00000117118	1	17345217	17380665	N	N	N	8	843	43.51
PADI2	ENSG00000117115	1	17393256	17445948	N	N	Y	16	1998	51.75
PADI1	ENSG00000142623	1	17531621	17572500	N	N	N	16	1992	53.3
PADI3	ENSG00000142619	1	17575593	17610728	N	N	N	16	1995	51.48
PADI4	ENSG00000159339	1	17634690	17690499	N	Y	N	16	1992	49.06
RCC2	ENSG00000179051	1	17733256	17766220	N	N	N	12	1569	51.68
ARHGEF10L	ENSG00000074964	1	17866330	18024369	N	N	N	29	3840	54.36
ACTL8	ENSG00000117148	1	18081808	18153558	N	N	N	3	1101	48.15
IGSF21	ENSG00000117154	1	18434240	18704977	N	N	Y	10	1404	49.91
KLHDC7A	ENSG00000179023	1	18807424	18812478	N	N	N	1	2334	58.18
PAX7	ENSG00000009709	1	18957500	19075360	Y	N	N	8	1563	52.35
TAS1R2	ENSG00000179002	1	19166093	19186176	N	Y	N	6	2520	49.67
RP13-279N23.2	ENSG00000255275	1	19175767	19247615	N	N	N	27	889	53.75
ALDH4A1	ENSG00000159423	1	19197926	19229275	N	N	N	15	1692	55.04
IFFO2	ENSG00000169991	1	19230775	19283180	N	N	N	9	1554	54.34
UBR4	ENSG00000127481	1	19401000	19536770	Y	N	N	107	15615	43.74
EMC1	ENSG00000127463	1	19542158	19578046	N	N	N	23	2982	46.63
MRTO4	ENSG00000053372	1	19578033	19586622	N	N	N	8	720	53.49
AKR7A3	ENSG00000162482	1	19609052	19615744	N	N	N	7	996	54.95
AKR7A2	ENSG00000053371	1	19630459	19638640	N	N	N	7	1080	52.87
PQLC2	ENSG00000040487	1	19638820	19655794	N	N	N	8	876	54.93
CAPZB	ENSG00000077549	1	19665267	19812066	N	N	N	9	906	49.22
MINOS1	ENSG00000173436	1	19923477	19956314	N	N	N	4	237	42.95
NBL1	ENSG00000158747	1	19967048	19984945	N	Y	N	4	651	56.98
HTR6	ENSG00000158748	1	19991780	20006055	N	Y	N	3	1323	52.93
TMCO4	ENSG00000162542	1	20008706	20126438	N	N	N	16	1905	48.92
RNF186	ENSG00000178828	1	20140523	20141771	N	N	N	1	684	58.13
OTUD3	ENSG00000169914	1	20209006	20239438	N	N	Y	8	1197	41.28
PLA2G2E	ENSG00000188784	1	20246502	20250110	N	N	N	4	429	59.6
PLA2G2A	ENSG00000188257	1	20301925	20306932	N	N	N	6	435	52.14
PLA2G5	ENSG00000127472	1	20354672	20417683	N	Y	N	5	417	44.61
PLA2G2D	ENSG00000117215	1	20438432	20446050	N	N	N	4	438	50.61
PLA2G2F	ENSG00000158786	1	20465819	20476879	N	N	N	5	636	56.01
PLA2G2C	ENSG00000187980	1	20487746	20503917	N	N	N	3	453	51.69
UBXN10	ENSG00000162543	1	20512578	20522541	N	N	N	2	843	47.24
VWA5B1	ENSG00000158816	1	20617412	20681387	N	N	N	21	3663	50.36
CAMK2N1	ENSG00000162545	1	20808884	20812713	N	N	Y	2	237	57.6
MUL1	ENSG00000090432	1	20825943	20834654	N	N	N	4	1059	47.53
FAM43B	ENSG00000183114	1	20878932	20881512	N	N	N	1	990	67.88
CDA	ENSG00000158825	1	20915441	20945401	N	N	N	4	441	48.54
PINK1	ENSG00000158828	1	20959948	20978004	N	Y	Y	8	1746	50.78
DDOST	ENSG00000244038	1	20978270	20988000	N	N	N	11	1371	50.54
KIF17	ENSG00000117245	1	20990507	21044510	N	N	N	15	3090	52.54
SH2D5	ENSG00000189410	1	21046225	21059330	N	N	N	10	1272	61.39
HP1BP3	ENSG00000127483	1	21069154	21113816	N	N	N	13	1662	41.17
EIF4G3	ENSG00000075151	1	21132972	21503377	N	Y	Y	32	4776	39.36
ECE1	ENSG00000117298	1	21543740	21671997	Y	N	N	19	2313	52.19
NBPF3	ENSG00000142794	1	21766621	21811498	N	N	N	15	1902	43.05
ALPL	ENSG00000162551	1	21835858	21904905	Y	N	N	12	1575	51.64
RAP1GAP	ENSG00000076864	1	21922708	21995856	N	N	Y	25	2184	56.63
USP48	ENSG00000090686	1	22004791	22110099	N	N	N	27	3144	41.84
LDLRAD2	ENSG00000187942	1	22138758	22151714	N	N	N	5	819	54.29
HSPG2	ENSG00000142798	1	22148738	22263790	Y	N	N	97	13176	56.09
CELA3B	ENSG00000219073	1	22303514	22325135	N	N	N	8	813	49.6
CELA3A	ENSG00000142789	1	22328149	22339032	N	N	N	8	813	50.62
CDC42	ENSG00000070831	1	22379120	22419437	Y	N	Y	7	702	41.82
WNT4	ENSG00000162552	1	22446461	22470462	Y	N	N	5	1056	58.11
ZBTB40	ENSG00000184677	1	22778344	22857650	N	N	N	18	3720	42.7
EPHA8	ENSG00000070886	1	22890057	22930087	N	Y	N	17	3018	56.79
C1QA	ENSG00000173372	1	22962999	22966101	N	Y	N	3	738	56.78
C1QC	ENSG00000159189	1	22970123	22974603	N	N	N	3	738	54.68
C1QB	ENSG00000173369	1	22979255	22988031	N	N	N	3	762	51.13
EPHB2	ENSG00000133216	1	23037332	23241818	N	Y	N	17	3168	51.87
LACTBL1	ENSG00000215906	1	23280239	23291797	N	N	N	6	904	50.9
RP4-805N21.1	ENSG00000227868	1	23337327	23342343	N	N	N	2	442	45.88
KDM1A	ENSG00000004487	1	23345941	23410182	Y	N	N	21	2631	39.16
LUZP1	ENSG00000169641	1	23410516	23504301	Y	N	N	3	3231	43.28
HTR1D	ENSG00000179546	1	23516993	23521222	N	Y	N	2	1134	48.04
HNRNPR	ENSG00000125944	1	23630264	23670829	N	N	N	11	1911	38.85
ZNF436	ENSG00000125945	1	23685941	23695935	N	N	N	3	1413	46
C1orf213	ENSG00000249087	1	23695490	23698332	N	N	N	1	381	51.57
TCEA3	ENSG00000204219	1	23707554	23751233	N	N	N	11	1047	48.56
ASAP3	ENSG00000088280	1	23755055	23810685	N	N	N	25	2712	49.49
E2F2	ENSG00000007968	1	23832922	23857712	N	Y	N	7	1314	51.66
ID3	ENSG00000117318	1	23884409	23886285	N	Y	N	3	360	57.27
MDS2	ENSG00000197880	1	23907985	23967058	N	N	N	7	423	49.57
RPL11	ENSG00000142676	1	24018269	24022915	N	N	N	6	537	46.18
TCEB3	ENSG00000011007	1	24069645	24088549	Y	N	N	11	2397	45.7
PITHD1	ENSG00000057757	1	24104895	24114722	N	N	N	6	636	44.59
LYPLA2	ENSG00000011009	1	24117460	24122029	N	N	N	10	696	62.39
GALE	ENSG00000117308	1	24122089	24127271	N	N	N	12	1047	60.06
HMGCL	ENSG00000117305	1	24128375	24165110	Y	N	N	9	978	46.84
FUCA1	ENSG00000179163	1	24171567	24194784	N	N	N	8	1401	45.7
CNR2	ENSG00000188822	1	24197016	24285549	N	Y	N	3	1083	46.42
PNRC2	ENSG00000189266	1	24285599	24289952	N	Y	N	3	420	43.71
SRSF10	ENSG00000188529	1	24291294	24307417	Y	N	N	6	789	39.02
MYOM3	ENSG00000142661	1	24382525	24438665	N	N	N	37	4323	52.63
IL22RA1	ENSG00000142677	1	24446261	24469611	N	N	N	7	1725	48.4
IL28RA	ENSG00000185436	1	24480647	24514449	N	Y	N	7	1563	47.37
GRHL3	ENSG00000158055	1	24645812	24690972	Y	N	N	16	1881	51
C1orf201	ENSG00000001460	1	24683489	24743424	N	N	N	9	1005	44.09
NIPAL3	ENSG00000001461	1	24742284	24799466	N	Y	Y	12	1221	45
RCAN3	ENSG00000117602	1	24829387	24863506	N	N	N	5	726	42.29
C1orf130	ENSG00000184454	1	24882602	24935819	N	N	N	4	309	47.91
SRRM1	ENSG00000133226	1	24958207	24999758	N	N	Y	18	2751	41.76
CLIC4	ENSG00000169504	1	25071848	25170815	N	Y	N	7	762	41.67
RUNX3	ENSG00000020633	1	25226002	25291612	Y	N	N	6	1290	54.8
SYF2	ENSG00000117614	1	25549170	25558993	N	N	N	7	732	43.61
C1orf63	ENSG00000117616	1	25568728	25664704	N	N	N	6	876	46.4
RHD	ENSG00000187010	1	25598884	25656936	N	N	N	9	1482	46.66
TMEM50A	ENSG00000183726	1	25664408	25688852	N	N	N	7	474	42.04
RHCE	ENSG00000188672	1	25688741	25756683	N	N	N	10	1254	46.8
TMEM57	ENSG00000204178	1	25757388	25826700	N	N	N	11	1995	40.67
LDLRAP1	ENSG00000157978	1	25870071	25895377	N	Y	N	9	927	54.63
MAN1C1	ENSG00000117643	1	25943959	26112698	N	N	N	12	1893	48.51
SEPN1	ENSG00000162430	1	26126667	26144713	N	Y	N	13	1773	56.77
RP1-317E23.6	ENSG00000255054	1	26137961	26150235	N	N	N	4	132	56.05
FAM54B	ENSG00000117640	1	26145131	26159432	N	N	N	7	879	49.43
AL020996.1	ENSG00000223474	1	26145212	26147288	N	N	N	1	507	61.77
C1orf135	ENSG00000127423	1	26158414	26185903	N	N	N	4	1116	42.49
PAQR7	ENSG00000182749	1	26187701	26197744	N	N	N	2	1041	51.15
STMN1	ENSG00000117632	1	26210672	26233482	N	Y	Y	5	525	48.24
PAFAH2	ENSG00000158006	1	26286258	26324648	N	Y	N	11	1179	45.67
EXTL1	ENSG00000158008	1	26346375	26362955	N	N	Y	11	2031	55.41
SLC30A2	ENSG00000158014	1	26363743	26372624	N	N	N	8	1119	55.89
TRIM63	ENSG00000158022	1	26377795	26394927	N	Y	N	9	1062	49.92
PDIK1L	ENSG00000175087	1	26437664	26452034	N	N	N	3	1026	43.1
FAM110D	ENSG00000197245	1	26485511	26489119	N	N	N	2	816	59.74
ZNF593	ENSG00000142684	1	26496362	26498551	N	N	N	2	471	61.64
CNKSR1	ENSG00000142675	1	26503894	26516377	N	N	N	21	2163	55.23
CATSPER4	ENSG00000188782	1	26517052	26529459	N	Y	N	9	1449	50.8
CEP85	ENSG00000130695	1	26560691	26605299	N	N	N	14	2289	44.68
SH3BGRL3	ENSG00000142669	1	26605667	26608007	N	N	N	3	282	61.77
UBXN11	ENSG00000158062	1	26607819	26644854	N	N	N	16	1563	53.25
CD52	ENSG00000169442	1	26644448	26647014	N	Y	N	2	186	54.58
AIM1L	ENSG00000176092	1	26648350	26680621	N	N	N	19	2364	52.16
ZNF683	ENSG00000176083	1	26688125	26701013	N	N	N	7	1575	52.46
LIN28A	ENSG00000131914	1	26737269	26756213	Y	N	N	4	630	46.58
DHDDS	ENSG00000117682	1	26758773	26797785	N	N	N	9	1005	45.47
HMGN2	ENSG00000198830	1	26798941	26802463	N	N	N	6	273	48.34
RPS6KA1	ENSG00000117676	1	26856252	26901521	N	N	N	21	2235	53.51
ARID1A	ENSG00000117713	1	27022524	27108595	Y	N	N	20	6858	45.93
PIGV	ENSG00000060642	1	27113963	27124889	N	N	N	4	1482	48.34
ZDHHC18	ENSG00000204160	1	27153201	27183391	N	N	N	8	1167	51.46
SFN	ENSG00000175793	1	27189633	27190947	Y	N	N	1	747	62.74
GPN2	ENSG00000142751	1	27205773	27216788	N	N	N	5	933	49.39
GPATCH3	ENSG00000198746	1	27216979	27226957	N	N	N	7	1578	50.12
NUDC	ENSG00000090273	1	27226729	27273353	N	N	Y	9	996	48.43
NR0B2	ENSG00000131910	1	27237980	27240457	N	Y	N	2	774	53.51
C1orf172	ENSG00000175707	1	27276053	27286897	N	N	N	4	1197	51.28
TRNP1	ENSG00000253368	1	27320198	27327389	N	N	N	2	684	55.78
FAM46B	ENSG00000158246	1	27331511	27339327	N	N	N	2	1278	55.49
SLC9A1	ENSG00000090020	1	27425306	27493472	Y	N	N	12	2448	51.71
WDTC1	ENSG00000142784	1	27561007	27635110	Y	N	N	16	2034	46.51
TMEM222	ENSG00000186501	1	27648651	27662891	N	N	N	6	627	51.85
SYTL1	ENSG00000142765	1	27668513	27680421	N	Y	N	14	1689	58.27
MAP3K6	ENSG00000142733	1	27681670	27693383	N	Y	N	29	3867	60.78
FCN3	ENSG00000142748	1	27695603	27701315	N	N	N	8	900	54.45
CD164L2	ENSG00000174950	1	27705666	27709870	N	N	N	6	525	60.4
GPR3	ENSG00000181773	1	27719148	27722318	N	Y	N	2	993	57.99
WASF2	ENSG00000158195	1	27730730	27816669	Y	N	N	9	1497	44.01
AHDC1	ENSG00000126705	1	27860546	27930942	N	N	N	7	4812	56.39
FGR	ENSG00000000938	1	27938575	27961788	N	Y	N	13	1590	52.97
IFI6	ENSG00000126709	1	27992572	27998729	N	N	N	5	417	50.03
FAM76A	ENSG00000009780	1	28052490	28088475	N	N	N	10	1026	43.62
STX12	ENSG00000117758	1	28099694	28150963	N	N	Y	9	831	41.41
PPP1R8	ENSG00000117751	1	28157289	28178187	Y	N	N	7	1056	44.44
C1orf38	ENSG00000130775	1	28199055	28213196	N	N	N	6	1932	54.04
RPA2	ENSG00000117748	1	28218035	28241257	N	N	N	8	1077	44.15
SMPDL3B	ENSG00000130768	1	28261504	28285668	N	N	N	8	1368	49.86
XKR8	ENSG00000158156	1	28285973	28294607	N	N	N	3	1188	55.55
EYA3	ENSG00000158161	1	28296855	28415207	N	Y	N	18	1722	39.52
PTAFR	ENSG00000169403	1	28473677	28520447	N	Y	N	2	1029	48
AL353354.1	ENSG00000215902	1	28527013	28527152	N	N	N	2	66	42.86
DNAJC8	ENSG00000126698	1	28527068	28559536	N	N	N	9	762	43.06
ATPIF1	ENSG00000130770	1	28562620	28573417	N	N	Y	3	321	44.37
SESN2	ENSG00000130766	1	28586038	28609002	N	Y	N	10	1443	50.06
MED18	ENSG00000130772	1	28655513	28662476	N	N	N	4	627	46.05
PHACTR4	ENSG00000204138	1	28696114	28826881	Y	N	N	13	2139	42.87
RCC1	ENSG00000180198	1	28832455	28865708	N	N	N	11	1359	50.06
TRNAU1AP	ENSG00000180098	1	28879597	28905051	N	N	N	9	864	47.61
TAF12	ENSG00000120656	1	28915835	28969597	N	N	N	6	486	47.17
RAB42	ENSG00000188060	1	28918712	28921955	N	N	N	2	318	58.17
GMEB1	ENSG00000162419	1	28995244	29045865	N	N	N	10	1722	45.96
YTHDF2	ENSG00000198492	1	29063133	29096287	N	N	N	5	1740	43.57
OPRD1	ENSG00000116329	1	29138654	29190208	N	Y	N	3	1119	49.92
EPB41	ENSG00000159023	1	29213603	29446553	N	Y	N	21	2595	41.87
TMEM200B	ENSG00000253304	1	29445940	29450447	N	N	N	2	924	64.64
SRSF4	ENSG00000116350	1	29474255	29508499	N	N	N	6	1485	43
MECR	ENSG00000116353	1	29519385	29557454	N	N	N	10	1122	48.21
PTPRU	ENSG00000060656	1	29563028	29653325	N	N	N	31	4341	51.58
MATN1	ENSG00000162510	1	31184124	31196434	N	Y	N	8	1491	56.36
LAPTM5	ENSG00000162511	1	31205316	31230667	N	Y	N	8	789	52.62
SDC3	ENSG00000162512	1	31342314	31381608	N	Y	Y	5	1329	55.72
PUM1	ENSG00000134644	1	31404353	31538838	N	N	Y	22	3675	41.05
NKAIN1	ENSG00000084628	1	31652592	31712401	N	N	Y	7	624	50.46
SNRNP40	ENSG00000060688	1	31732417	31769662	N	N	N	11	1230	42.04
ZCCHC17	ENSG00000121766	1	31769842	31837783	N	N	N	7	732	41.86
FABP3	ENSG00000121769	1	31838472	31849697	N	Y	N	4	402	50.62
SERINC2	ENSG00000168528	1	31882412	31907525	N	N	N	11	1395	52.8
TINAGL1	ENSG00000142910	1	32042116	32053288	N	N	N	12	1404	55.46
HCRTR1	ENSG00000121764	1	32083287	32098119	N	Y	N	7	1278	54.7
PEF1	ENSG00000162517	1	32095463	32110497	N	N	N	5	855	48.36
COL16A1	ENSG00000084636	1	32117848	32169920	N	N	N	72	4815	56
BAI2	ENSG00000121753	1	32192718	32230494	N	Y	Y	33	4758	58.75
SPOCD1	ENSG00000134668	1	32256023	32281652	N	N	N	16	3651	49.3
PTP4A2	ENSG00000184007	1	32372022	32410457	N	N	Y	6	504	41.84
AL136115.1	ENSG00000212673	1	32379174	32380745	N	N	N	1	318	37.02
KHDRBS1	ENSG00000121774	1	32479430	32526451	Y	N	N	9	1332	43.63
TMEM39B	ENSG00000121775	1	32537632	32568467	N	N	N	9	1479	48.85
KPNA6	ENSG00000025800	1	32573639	32642169	N	Y	N	14	1626	44.21
TXLNA	ENSG00000084652	1	32645287	32663886	N	N	N	11	1641	50.3
CCDC28B	ENSG00000160050	1	32665987	32670988	N	N	N	5	726	54.62
IQCC	ENSG00000160051	1	32671236	32674288	N	N	Y	5	1641	55.49
DCDC2B	ENSG00000222046	1	32674695	32681797	N	N	N	9	1050	53.13
TMEM234	ENSG00000160055	1	32680073	32687972	N	N	N	4	543	51.48
EIF3I	ENSG00000084623	1	32687529	32697205	N	N	N	11	978	50.5
FAM167B	ENSG00000183615	1	32712834	32714457	N	N	N	2	492	60.28
LCK	ENSG00000182866	1	32716840	32751766	N	Y	N	13	1620	49.59
HDAC1	ENSG00000116478	1	32757687	32799236	Y	N	N	14	1449	46.79
MARCKSL1	ENSG00000175130	1	32799433	32801980	Y	N	Y	2	588	64.21
TSSK3	ENSG00000162526	1	32817122	32829913	N	N	N	2	807	54.7
RP4-811H24.6	ENSG00000225828	1	32826871	32829879	N	N	N	3	384	61.28
BSDC1	ENSG00000160058	1	32830704	32860332	N	N	N	10	1425	47.99
RP1-27O5.3	ENSG00000254553	1	32930658	33066393	N	N	N	10	1539	44.62
ZBTB8B	ENSG00000215897	1	32930670	32953461	N	N	N	4	1488	46.57
ZBTB8A	ENSG00000160062	1	33005028	33066591	N	N	N	5	1326	43.71
ZBTB8OS	ENSG00000176261	1	33065773	33116504	N	N	N	7	540	44.37
RBBP4	ENSG00000162521	1	33116743	33146258	N	N	N	12	1278	43.27
SYNC	ENSG00000162520	1	33145507	33169197	N	Y	N	5	1449	47.85
KIAA1522	ENSG00000162522	1	33207486	33240571	N	N	N	7	3285	54.38
YARS	ENSG00000134684	1	33240840	33283754	N	N	N	13	1587	46.35
S100PBP	ENSG00000116497	1	33282368	33324476	N	N	N	7	1227	41.44
FNDC5	ENSG00000160097	1	33327869	33338083	N	N	N	6	414	54.01
HPCA	ENSG00000121905	1	33351595	33364042	N	Y	Y	4	582	57.12
TMEM54	ENSG00000121900	1	33360195	33367039	N	N	N	6	669	57.33
RNF19B	ENSG00000116514	1	33402046	33430286	N	Y	N	9	2199	44.34
AK2	ENSG00000004455	1	33473585	33546597	N	N	N	6	720	46.32
ADC	ENSG00000142920	1	33546705	33586131	N	N	N	9	1443	45.93
TRIM62	ENSG00000116525	1	33611003	33647660	N	N	N	6	1428	51.85
ZNF362	ENSG00000160094	1	33722146	33766320	N	N	N	9	1263	50.56
PHC2	ENSG00000134686	1	33789224	33896653	N	Y	N	15	2580	45.03
ZSCAN20	ENSG00000121903	1	33938246	33961995	N	N	N	8	3132	43.34
CSMD2	ENSG00000121904	1	33979609	34631443	N	N	N	71	10896	45.21
HMGB4	ENSG00000176256	1	34326076	34330392	N	N	N	2	561	45.43
C1orf94	ENSG00000142698	1	34632484	34684732	N	N	N	7	1797	47.51
C1orf212	ENSG00000163866	1	35178338	35325417	N	N	N	2	279	47.95
GJB5	ENSG00000189280	1	35220648	35224113	Y	N	N	2	822	54.15
GJB4	ENSG00000189433	1	35225342	35229325	N	Y	N	2	801	56.12
GJB3	ENSG00000188910	1	35246790	35251970	Y	N	N	2	813	56.92
GJA4	ENSG00000187513	1	35258599	35261348	N	Y	N	2	1002	59.35
DLGAP3	ENSG00000116544	1	35331037	35395186	N	Y	N	12	2940	48.59
ZMYM6	ENSG00000163867	1	35447134	35497569	N	N	N	16	3978	39.91
ZMYM6NB	ENSG00000243749	1	35447136	35450954	N	N	N	3	465	51.77
ZMYM1	ENSG00000197056	1	35525387	35581460	N	N	N	10	3429	41.67
SFPQ	ENSG00000116560	1	35641979	35658749	N	N	N	10	2124	41.83
ZMYM4	ENSG00000146463	1	35734568	35887659	N	N	N	30	4647	38.64
KIAA0319L	ENSG00000142687	1	35899091	36023551	N	N	N	21	3150	41.89
NCDN	ENSG00000020129	1	36023074	36032875	Y	N	Y	7	2190	57.71
TFAP2E	ENSG00000116819	1	36038971	36060929	N	Y	N	7	1329	52.53
PSMB2	ENSG00000126067	1	36067185	36107445	N	N	N	6	606	41
C1orf216	ENSG00000142686	1	36179476	36185073	N	N	Y	2	690	53.73
CLSPN	ENSG00000092853	1	36185819	36235568	N	N	N	25	4020	42.79
EIF2C4	ENSG00000134698	1	36273773	36323491	N	N	N	18	2586	41.53
EIF2C1	ENSG00000092847	1	36335409	36395211	N	N	N	19	2574	44.91
EIF2C3	ENSG00000126070	1	36396319	36522063	N	N	N	19	2583	38.93
TEKT2	ENSG00000092850	1	36549676	36553876	N	Y	N	10	1293	58.32
ADPRHL2	ENSG00000116863	1	36554476	36559533	N	N	N	6	1092	55.16
COL8A2	ENSG00000171812	1	36560837	36590821	N	Y	N	4	2112	55.63
TRAPPC3	ENSG00000054116	1	36602173	36615098	N	N	N	5	543	47.19
MAP7D1	ENSG00000116871	1	36621180	36646450	N	N	Y	17	2526	54.66
THRAP3	ENSG00000054118	1	36690017	36770958	N	N	N	12	2868	43.72
SH3D21	ENSG00000214193	1	36771988	36790484	N	N	N	16	2271	54.1
FAM176B	ENSG00000142694	1	36787632	36789755	N	N	N	3	498	70.2
AL591845.1	ENSG00000116883	1	36789335	36794818	N	N	N	2	324	52.9
STK40	ENSG00000196182	1	36805225	36851497	N	N	N	11	1323	52.28
LSM10	ENSG00000181817	1	36856839	36863493	N	N	N	2	372	50.65
OSCP1	ENSG00000116885	1	36881428	36916086	N	N	N	11	1170	45.46
MRPS15	ENSG00000116898	1	36921319	36930038	N	N	N	8	774	49.28
CSF3R	ENSG00000119535	1	36931644	36948879	N	Y	N	15	2592	53.16
GRIK3	ENSG00000163873	1	37261128	37499730	N	Y	N	16	2760	49.57
ZC3H12A	ENSG00000163874	1	37940153	37949978	N	Y	N	6	1800	59.32
MEAF6	ENSG00000163875	1	37958176	37980375	N	N	Y	8	606	42.74
SNIP1	ENSG00000163877	1	38002142	38019903	N	N	N	4	1191	43.16
DNALI1	ENSG00000163879	1	38022520	38032458	N	N	N	6	843	49.25
GNL2	ENSG00000134697	1	38032417	38061536	N	N	N	16	2196	42.77
RSPO1	ENSG00000169218	1	38076951	38100595	N	Y	N	9	792	52.57
C1orf109	ENSG00000116922	1	38147242	38157914	N	N	N	5	612	48.38
CDCA8	ENSG00000134690	1	38158090	38175391	Y	N	N	11	843	45.82
EPHA10	ENSG00000183317	1	38179552	38230805	N	N	N	20	3045	50.36
MANEAL	ENSG00000185090	1	38259474	38266809	N	N	N	4	1374	54.73
YRDC	ENSG00000196449	1	38268616	38273857	N	N	N	5	840	49.48
C1orf122	ENSG00000197982	1	38272651	38275126	N	N	Y	2	480	63.25
MTF1	ENSG00000188786	1	38279851	38325292	Y	N	N	11	2262	43.56
AL929472.1	ENSG00000230610	1	38292232	38293886	N	N	N	2	45	40
INPP5B	ENSG00000204084	1	38326369	38412729	N	Y	N	24	2982	46.64
SF3A3	ENSG00000183431	1	38422647	38456593	N	N	N	17	1506	44.59
FHL3	ENSG00000183386	1	38462442	38471278	N	N	N	6	843	56.84
UTP11L	ENSG00000183520	1	38474930	38490496	N	N	N	8	762	44.58
POU3F1	ENSG00000185668	1	38509523	38512450	Y	N	N	1	1356	63.25
RRAGC	ENSG00000116954	1	39303870	39325495	N	N	N	7	1200	41.45
MYCBP	ENSG00000214114	1	39328636	39347289	N	N	N	5	312	43.54
GJA9	ENSG00000131233	1	39330175	39347289	N	N	N	2	1548	43.89
RHBDL2	ENSG00000158315	1	39351479	39407471	N	N	N	8	1152	44.61
AKIRIN1	ENSG00000174574	1	39456895	39471731	N	Y	N	5	579	43.9
NDUFS5	ENSG00000168653	1	39491990	39500308	N	N	N	3	321	46.54
MACF1	ENSG00000127603	1	39546988	39952849	Y	N	Y	101	22779	42.57
KIAA0754	ENSG00000255103	1	39876151	39882154	N	N	N	1	3876	48.88
BMP8A	ENSG00000183682	1	39957318	39991607	N	Y	N	7	1209	55
PABPC4	ENSG00000090621	1	40026488	40042462	N	N	N	16	1983	47.27
HEYL	ENSG00000163909	1	40089825	40105617	N	Y	N	5	987	52.2
NT5C1A	ENSG00000116981	1	40124793	40137710	N	N	N	6	1107	52.18
HPCAL4	ENSG00000116983	1	40144320	40157361	N	N	Y	4	576	52.84
PPIE	ENSG00000084072	1	40157854	40229586	N	N	N	11	945	45.04
BMP8B	ENSG00000116985	1	40222854	40254533	Y	N	N	7	1209	55.56
OXCT2	ENSG00000198754	1	40235195	40237020	N	N	N	1	1554	63.36
TRIT1	ENSG00000043514	1	40306708	40349183	N	N	N	11	1404	42.47
MYCL1	ENSG00000116990	1	40361098	40367928	N	Y	N	3	1185	53.68
MFSD2A	ENSG00000168389	1	40420802	40435638	N	N	N	14	1632	53.7
CAP1	ENSG00000131236	1	40505905	40538321	N	N	N	13	1428	43.27
PPT1	ENSG00000131238	1	40538379	40563375	N	Y	N	9	921	44.07
RLF	ENSG00000117000	1	40627045	40706593	N	N	N	8	5745	39.69
TMCO2	ENSG00000188800	1	40711619	40717363	N	N	N	2	549	43.03
ZMPSTE24	ENSG00000084073	1	40723779	40759856	Y	N	N	10	1428	40.78
COL9A2	ENSG00000049089	1	40766159	40783488	N	N	N	32	2070	57.43
SMAP2	ENSG00000084070	1	40810522	40888998	N	N	N	10	1290	41.95
ZNF643	ENSG00000187801	1	40915774	40929390	N	N	N	6	1605	41.8
ZNF642	ENSG00000187815	1	40942887	40962015	N	N	N	6	1581	41.16
DEM1	ENSG00000164002	1	40974413	40982228	N	N	Y	2	1122	43.67
ZNF684	ENSG00000117010	1	40997233	41013841	N	N	N	5	1137	40.31
RIMS3	ENSG00000117016	1	41086351	41131329	N	N	Y	8	927	51.39
NFYC	ENSG00000066136	1	41157320	41237275	N	N	N	10	1377	42.65
KCNQ4	ENSG00000117013	1	41249684	41306124	N	Y	N	14	2088	55.42
CITED4	ENSG00000179862	1	41326729	41328018	N	N	N	1	555	73.72
CTPS1	ENSG00000171793	1	41445007	41478235	N	N	N	18	1776	45.27
SLFNL1	ENSG00000171790	1	41481269	41488909	N	N	N	5	1224	57.34
SCMH1	ENSG00000010803	1	41492872	41707826	N	Y	N	15	1983	39.5
FOXO6	ENSG00000204060	1	41827594	41849262	N	N	N	2	1680	58.03
EDN2	ENSG00000127129	1	41944446	41950344	N	N	N	5	537	56.98
HIVEP3	ENSG00000127124	1	41972036	42501596	N	Y	N	9	7221	46.45
GUCA2B	ENSG00000044012	1	42619092	42621495	N	Y	N	3	339	59.94
GUCA2A	ENSG00000197273	1	42628362	42630389	N	Y	N	3	348	57.54
FOXJ3	ENSG00000198815	1	42642210	42801548	N	Y	N	13	1869	38.57
RIMKLA	ENSG00000177181	1	42846466	42880850	N	N	N	5	1176	43.34
ZMYND12	ENSG00000066185	1	42896000	42921938	N	N	N	8	1098	42.83
PPCS	ENSG00000127125	1	42921788	42948411	N	N	N	3	936	40.84
CCDC30	ENSG00000186409	1	42929001	43120335	N	N	N	23	2352	39.32
PPIH	ENSG00000171960	1	43124096	43142429	N	N	N	10	534	43.8
YBX1	ENSG00000065978	1	43148098	43168020	Y	N	N	7	1124	40.41
CLDN19	ENSG00000164007	1	43198764	43205925	N	Y	N	5	675	59.56
LEPRE1	ENSG00000117385	1	43212006	43232755	N	Y	N	14	2415	50.03
C1orf50	ENSG00000164008	1	43232940	43264127	N	N	N	5	697	46.04
CCDC23	ENSG00000177868	1	43272723	43282954	N	N	N	4	201	41.46
ERMAP	ENSG00000164010	1	43282795	43310660	N	N	N	11	1428	43.13
ZNF691	ENSG00000164011	1	43312280	43318148	N	N	N	3	948	47.15
SLC2A1	ENSG00000117394	1	43391519	43424530	Y	N	N	10	1479	52.84
FAM183A	ENSG00000186973	1	43610029	43622067	N	N	N	4	419	44.31
EBNA1BP2	ENSG00000117395	1	43629846	43727589	N	N	N	10	1086	44.36
WDR65	ENSG00000243710	1	43637820	43720029	N	N	N	23	3753	44.04
TMEM125	ENSG00000179178	1	43735665	43739673	N	N	N	4	660	58.32
C1orf210	ENSG00000253313	1	43747554	43751288	N	N	N	3	342	53.9
TIE1	ENSG00000066056	1	43766664	43788779	Y	N	N	23	3417	54.59
MPL	ENSG00000117400	1	43803478	43818443	N	Y	N	12	1908	48.47
CDC20	ENSG00000117399	1	43824626	43828874	Y	N	N	11	1500	52.2
ELOVL1	ENSG00000066322	1	43829068	43833697	N	N	Y	8	840	58.53
MED8	ENSG00000159479	1	43849588	43855479	N	N	N	8	906	46.78
SZT2	ENSG00000198198	1	43855553	43918321	Y	N	N	71	10128	49.96
HYI	ENSG00000178922	1	43916824	43919660	N	N	N	9	909	59.89
PTPRF	ENSG00000142949	1	43990858	44089343	N	Y	N	32	5724	55.69
KDM4A	ENSG00000066135	1	44115829	44171186	N	N	N	22	3195	46.75
ST3GAL3	ENSG00000126091	1	44171495	44396831	N	N	N	13	1335	44.35
ARTN	ENSG00000117407	1	44398992	44402913	N	Y	N	2	714	63.77
IPO13	ENSG00000117408	1	44412611	44433694	N	N	N	20	2892	51.66
DPH2	ENSG00000132768	1	44435672	44439041	N	N	N	6	1470	56.05
ATP6V0B	ENSG00000117410	1	44440159	44443967	N	N	Y	7	786	57.08
B4GALT2	ENSG00000117411	1	44444615	44456840	N	Y	N	7	1206	56.94
CCDC24	ENSG00000159214	1	44457031	44462200	N	N	N	9	924	57.95
SLC6A9	ENSG00000196517	1	44457172	44497139	Y	N	N	14	2121	56.44
KLF17	ENSG00000171872	1	44584522	44600812	N	N	N	4	1170	45.36
DMAP1	ENSG00000178028	1	44679127	44686353	Y	N	N	10	1404	52.33
ERI3	ENSG00000117419	1	44686742	44820932	N	N	Y	9	1014	47.73
RNF220	ENSG00000187147	1	44870866	45117396	N	N	Y	14	1701	47.21
TMEM53	ENSG00000126106	1	45100910	45140227	N	N	N	3	834	51.56
C1orf228	ENSG00000198520	1	45140364	45191263	N	N	N	13	1323	47.54
KIF2C	ENSG00000142945	1	45205490	45233439	N	N	N	21	2178	49.08
RPS8	ENSG00000142937	1	45240923	45244451	N	N	N	6	627	55.11
BEST4	ENSG00000142959	1	45249257	45253377	N	N	N	9	1422	59.01
PLK3	ENSG00000173846	1	45265897	45271662	N	Y	N	15	1941	59.69
TCTEX1D4	ENSG00000188396	1	45271585	45272957	N	N	N	2	666	63.73
BTBD19	ENSG00000222009	1	45274154	45281257	N	N	N	8	876	56.17
PTCH2	ENSG00000117425	1	45285516	45308735	N	Y	N	22	3612	53.14
EIF2B3	ENSG00000070785	1	45316450	45452282	N	N	N	12	1359	42.52
HECTD3	ENSG00000126107	1	45468212	45477001	N	N	N	21	2586	56.66
UROD	ENSG00000126088	1	45477819	45481247	Y	N	N	10	1104	52.29
ZSWIM5	ENSG00000162415	1	45482071	45771881	N	N	N	14	3558	41.49
HPDL	ENSG00000186603	1	45792545	45794347	N	N	N	1	1116	61.06
MUTYH	ENSG00000132781	1	45794835	45806142	N	N	N	16	1650	51.03
TOE1	ENSG00000132773	1	45805342	45809647	N	N	N	8	1533	53.53
TESK2	ENSG00000070759	1	45809555	45956872	N	N	N	11	1716	42.23
CCDC163P	ENSG00000236624	1	45959538	45965751	N	N	N	4	495	50.89
MMACHC	ENSG00000132763	1	45965725	45976739	N	N	N	4	849	48.72
PRDX1	ENSG00000117450	1	45976708	45988719	N	Y	N	6	600	47.46
AKR1A1	ENSG00000117448	1	46016215	46035721	N	Y	N	10	978	49.1
NASP	ENSG00000132780	1	46049518	46084566	Y	N	N	16	2373	42.89
CCDC17	ENSG00000159588	1	46085716	46089729	N	N	N	13	1869	58.1
GPBP1L1	ENSG00000159592	1	46092976	46153785	N	N	N	12	1425	41.19
TMEM69	ENSG00000159596	1	46152886	46160115	N	N	N	3	744	44.47
IPP	ENSG00000197429	1	46159996	46216322	N	N	N	9	1755	42.34
MAST2	ENSG00000086015	1	46252659	46501896	N	N	N	29	5397	41.32
PIK3R3	ENSG00000117461	1	46505812	46642160	N	N	Y	10	1524	42.27
TSPAN1	ENSG00000117472	1	46640745	46651630	N	N	N	9	726	50.69
POMGNT1	ENSG00000085998	1	46654354	46685977	Y	N	N	23	2247	49.39
LURAP1	ENSG00000171357	1	46669006	46686933	N	N	N	2	720	46.79
RAD54L	ENSG00000085999	1	46713360	46744145	N	Y	N	18	2244	46.5
LRRC41	ENSG00000132128	1	46726868	46769280	N	N	N	10	2439	47.41
UQCRH	ENSG00000173660	1	46769303	46782448	N	N	N	4	276	46.3
NSUN4	ENSG00000117481	1	46805849	46830824	N	N	N	6	1155	47.35
FAAH	ENSG00000117480	1	46859937	46879520	N	Y	N	15	1740	55.38
DMBX1	ENSG00000197587	1	46972668	46979898	Y	N	N	4	1149	55.86
KNCN	ENSG00000162456	1	47011316	47017199	N	N	N	4	375	56.75
MKNK1	ENSG00000079277	1	47023090	47082515	N	Y	N	14	1398	48.24
MOB3C	ENSG00000142961	1	47073387	47082563	N	N	N	4	807	54.42
ATPAF1	ENSG00000123472	1	47098409	47139539	N	N	Y	9	1056	41.86
KIAA0494	ENSG00000159658	1	47124366	47184824	N	N	N	11	1488	41.66
ATPAF1-AS1	ENSG00000186118	1	47134527	47139266	N	N	N	2	783	48.86
CYP4B1	ENSG00000142973	1	47223510	47285085	N	N	N	12	1539	43.78
CYP4A11	ENSG00000187048	1	47394849	47407156	N	Y	N	13	1563	48.46
CYP4X1	ENSG00000186377	1	47427036	47516423	N	N	Y	12	1530	41.09
CYP4Z1	ENSG00000186160	1	47533160	47583991	N	N	N	12	1518	39.77
CYP4A22	ENSG00000162365	1	47603107	47615413	N	N	N	12	1560	48.58
PDZK1IP1	ENSG00000162366	1	47649265	47656716	N	N	N	4	345	57.89
TAL1	ENSG00000162367	1	47681963	47697892	Y	N	N	4	1002	53.16
STIL	ENSG00000123473	1	47715811	47779819	Y	N	N	17	3867	40.02
CMPK1	ENSG00000162368	1	47799469	47844511	N	N	N	6	687	42.2
FOXE3	ENSG00000186790	1	47881744	47883723	N	Y	N	1	960	68.28
FOXD2	ENSG00000186564	1	47901689	47906363	N	Y	N	1	1488	64.92
RP11-543D5.3	ENSG00000204018	1	48231308	48462567	N	N	N	7	1554	48.68
SLC5A9	ENSG00000117834	1	48688357	48714316	N	N	N	15	2121	48.99
SPATA6	ENSG00000132122	1	48761044	48937845	N	N	N	13	1467	37.03
AGBL4	ENSG00000186094	1	48998527	50489585	N	N	N	14	1512	39.05
BEND5	ENSG00000162373	1	49193195	49242641	N	N	N	6	1266	44.07
AL645730.2	ENSG00000227839	1	50459990	50461874	N	N	N	1	324	47.96
ELAVL4	ENSG00000162374	1	50513686	50669458	N	Y	Y	7	1158	40.1
DMRTA2	ENSG00000142700	1	50883222	50889172	N	N	N	2	1629	60.11
FAF1	ENSG00000185104	1	50905150	51425935	Y	N	N	20	1953	38.25
CDKN2C	ENSG00000123080	1	51426417	51440305	N	Y	N	4	507	40.97
C1orf185	ENSG00000204006	1	51567906	51613752	N	N	N	5	600	37.89
RNF11	ENSG00000123091	1	51701943	51739127	N	N	Y	3	465	41.25
TTC39A	ENSG00000085831	1	51752930	51810788	N	N	N	18	1842	51.4
EPS15	ENSG00000085832	1	51819935	51985000	N	N	Y	25	2691	38.05
OSBPL9	ENSG00000117859	1	52042851	52254889	N	N	N	24	2265	39.87
NRD1	ENSG00000078618	1	52254863	52344477	Y	N	N	33	3660	39.33
RAB3B	ENSG00000169213	1	52373628	52456436	N	Y	Y	6	660	44.37
TXNDC12	ENSG00000117862	1	52485803	52521843	N	N	N	7	519	43.03
KTI12	ENSG00000198841	1	52497775	52499488	N	N	N	1	1065	55.37
BTF3L4	ENSG00000134717	1	52521797	52556388	N	N	N	6	477	41.19
ZFYVE9	ENSG00000157077	1	52608046	52812358	N	N	N	18	4278	40.79
CC2D1B	ENSG00000154222	1	52811395	52831865	N	N	N	24	2577	51.22
ORC1	ENSG00000085840	1	52838501	52870131	N	N	N	17	2586	44.76
PRPF38A	ENSG00000134748	1	52870236	52883992	N	N	N	10	939	42.09
ZCCHC11	ENSG00000134744	1	52873954	53019159	N	N	N	30	4938	38.59
GPX7	ENSG00000116157	1	53068044	53074723	N	N	N	3	564	49.67
FAM159A	ENSG00000182183	1	53099016	53135355	N	N	N	3	573	45.98
SELRC1	ENSG00000162377	1	53152508	53164038	N	N	N	3	696	46.41
ZYG11B	ENSG00000162378	1	53192126	53293014	N	N	Y	14	2235	41.29
ZYG11A	ENSG00000203995	1	53308183	53360670	N	N	N	14	2280	43.56
ECHDC2	ENSG00000121310	1	53361656	53392884	N	N	N	10	879	47.15
SCP2	ENSG00000116171	1	53392901	53517375	N	Y	N	16	1644	40.01
PODN	ENSG00000174348	1	53527854	53551174	N	N	N	11	1986	55.94
SLC1A7	ENSG00000162383	1	53552855	53608289	N	N	N	11	1683	53.19
CPT2	ENSG00000157184	1	53662101	53679869	N	N	N	5	1977	44.68
C1orf123	ENSG00000162384	1	53679771	53686289	N	N	N	8	483	46.92
MAGOH	ENSG00000162385	1	53692564	53704282	Y	N	N	5	441	41.63
LRP8	ENSG00000157193	1	53711217	53793742	N	Y	N	19	2892	52.24
DMRTB1	ENSG00000143006	1	53925072	53933161	N	N	N	4	1029	54.92
GLIS1	ENSG00000174332	1	53971910	54199877	N	Y	N	10	1863	50.76
TMEM48	ENSG00000058804	1	54231133	54304533	N	N	N	18	2025	40.26
YIPF1	ENSG00000058799	1	54317392	54356407	N	N	N	10	996	43.57
DIO1	ENSG00000211452	1	54356912	54376759	N	Y	N	4	750	47.96
HSPB11	ENSG00000081870	1	54387234	54411975	N	N	N	6	435	40.37
LRRC42	ENSG00000116212	1	54411750	54433841	N	N	N	9	1287	43.06
LDLRAD1	ENSG00000203985	1	54474412	54483856	N	N	N	6	618	54.45
TMEM59	ENSG00000116209	1	54497347	54519177	N	N	N	8	972	38.71
TCEANC2	ENSG00000116205	1	54519260	54578192	N	N	N	4	717	42.31
AL161915.1	ENSG00000212670	1	54569968	54571750	N	N	N	1	393	49.13
CDCP2	ENSG00000157211	1	54598747	54619443	N	N	N	4	1350	49.47
RP11-446E24.4	ENSG00000256407	1	54606897	54665746	N	N	N	8	213	49.13
AL357673.1	ENSG00000248835	1	54635333	54637997	N	N	N	1	381	49.76
CYB5RL	ENSG00000215883	1	54638009	54665709	N	N	N	6	948	48.94
MRPL37	ENSG00000116221	1	54649714	54686603	N	N	N	7	1272	48.16
SSBP3	ENSG00000157216	1	54692190	54879152	Y	N	N	18	1167	50.92
C1orf191	ENSG00000198711	1	54703710	54704736	N	N	N	1	303	58.52
ACOT11	ENSG00000162390	1	55007930	55104865	N	N	N	17	1824	51.2
FAM151A	ENSG00000162391	1	55074855	55089229	N	N	N	8	1758	51.79
HEATR8	ENSG00000184313	1	55107459	55207981	N	N	N	24	3972	46.98
TTC4	ENSG00000243725	1	55181495	55208330	N	N	N	10	1197	42.06
PARS2	ENSG00000162396	1	55222571	55230187	N	N	N	2	1428	49.77
TTC22	ENSG00000006555	1	55245385	55266940	N	N	N	7	1710	52.26
C1orf177	ENSG00000162398	1	55271736	55307925	N	N	N	10	1257	47.08
DHCR24	ENSG00000116133	1	55315306	55352891	Y	N	N	9	1551	47.68
TMEM61	ENSG00000143001	1	55446465	55457966	N	N	N	3	633	52.92
BSND	ENSG00000162399	1	55464606	55476556	Y	N	N	4	963	51.94
PCSK9	ENSG00000169174	1	55505221	55530525	N	Y	N	12	2079	55.51
USP24	ENSG00000162402	1	55532032	55681039	N	N	N	68	7863	37.85
PPAP2B	ENSG00000162407	1	56960419	57110974	Y	N	Y	6	936	41.42
PRKAA2	ENSG00000162409	1	57110995	57181008	N	Y	N	9	1659	36.6
C1orf168	ENSG00000187889	1	57184477	57285369	N	N	N	20	2187	38.48
C8A	ENSG00000157131	1	57320479	57383894	N	N	N	11	1755	40.56
C8B	ENSG00000021852	1	57394883	57431813	N	Y	N	12	1776	42.82
DAB1	ENSG00000173406	1	57460451	59012406	Y	N	Y	15	1767	40.83
OMA1	ENSG00000162600	1	58881056	59012474	N	N	N	9	1575	39.98
TACSTD2	ENSG00000184292	1	59041099	59043166	N	N	N	1	972	59.38
MYSM1	ENSG00000162601	1	59120411	59165764	N	N	N	20	2487	36.33
JUN	ENSG00000177606	1	59246465	59249785	Y	N	N	1	996	56.01
FGGY	ENSG00000172456	1	59762310	60233347	N	N	N	17	1728	40.59
HOOK1	ENSG00000134709	1	60280458	60342050	N	Y	N	22	2187	34.37
CYP2J2	ENSG00000134716	1	60358980	60392462	N	N	N	9	1509	39.79
C1orf87	ENSG00000162598	1	60452941	60539442	N	N	N	12	1641	38.38
NFIA	ENSG00000162599	1	61330931	61928465	Y	N	N	12	1665	40.05
TM2D1	ENSG00000162604	1	62146717	62191095	N	N	Y	7	810	39.63
INADL	ENSG00000132849	1	62208149	62629592	N	N	N	43	5406	40.43
L1TD1	ENSG00000240563	1	62660503	62678000	N	Y	N	4	2598	43.27
KANK4	ENSG00000132854	1	62702651	62785085	N	N	N	10	2988	46.96
USP1	ENSG00000162607	1	62901968	62917475	Y	N	N	9	2358	39.48
DOCK7	ENSG00000116641	1	62920399	63153969	N	Y	N	49	6390	36.06
ANGPTL3	ENSG00000132855	1	63063158	63071830	N	Y	N	7	1383	29.4
ATG4C	ENSG00000125703	1	63249806	63331184	N	Y	Y	11	1377	35.44
FOXD3	ENSG00000187140	1	63788730	63790797	Y	N	N	1	1437	63.97
ALG6	ENSG00000088035	1	63833261	63904233	N	N	N	14	1530	37.93
ITGB3BP	ENSG00000142856	1	63906441	64059392	N	N	N	10	651	36.68
EFCAB7	ENSG00000203965	1	63989043	64038364	N	N	Y	14	1890	35.15
DLEU2L	ENSG00000116652	1	64014635	64015911	N	N	N	2	168	32.65
PGM1	ENSG00000079739	1	64058947	64125916	N	N	N	11	1743	42.42
ROR1	ENSG00000185483	1	64239693	64647181	Y	N	N	9	2814	40.97
UBE2U	ENSG00000177414	1	64669310	64733051	N	N	N	10	966	37.76
CACHD1	ENSG00000158966	1	64936428	65158741	N	N	N	27	3825	39.93
RAVER2	ENSG00000162437	1	65210778	65298915	N	N	Y	12	2076	37.2
JAK1	ENSG00000162434	1	65298912	65432187	Y	N	N	25	3465	42.69
AK4	ENSG00000162433	1	65613232	65697828	N	N	N	6	672	42.62
DNAJC6	ENSG00000116675	1	65713902	65881552	Y	N	Y	19	2913	40.01
LEPR	ENSG00000116678	1	65886248	66107242	N	Y	Y	20	3498	37.79
LEPROT	ENSG00000213625	1	65886270	65901690	N	N	N	4	396	40.78
PDE4B	ENSG00000184588	1	66258197	66840259	N	Y	N	17	2211	37.45
SGIP1	ENSG00000118473	1	66999066	67213982	N	N	Y	27	2580	37.83
AL139147.1	ENSG00000248458	1	67131547	67142710	N	N	N	2	546	38.22
TCTEX1D1	ENSG00000152760	1	67218142	67244470	N	N	N	5	540	37.34
INSL5	ENSG00000172410	1	67263424	67266939	N	Y	N	2	408	37.34
WDR78	ENSG00000152763	1	67278568	67390570	N	N	N	17	2547	36.44
MIER1	ENSG00000198160	1	67390578	67454302	N	N	N	14	1698	36.15
SLC35D1	ENSG00000116704	1	67465015	67519782	Y	N	N	12	1068	37.83
C1orf141	ENSG00000203963	1	67557859	67600639	N	N	N	8	1203	37.83
IL23R	ENSG00000162594	1	67632083	67725662	N	Y	N	11	1890	39.89
IL12RB2	ENSG00000081985	1	67773047	67862583	N	Y	N	16	2589	41.65
SERBP1	ENSG00000142864	1	67873493	67896098	N	N	N	8	1227	38.87
GADD45A	ENSG00000116717	1	68150744	68154021	N	Y	N	4	498	52.9
GNG12	ENSG00000172380	1	68167149	68299150	N	N	N	4	219	41.54
DIRAS3	ENSG00000162595	1	68511645	68517314	N	N	Y	2	690	44.02
WLS	ENSG00000116729	1	68564142	68698803	Y	N	Y	12	1638	41.57
RPE65	ENSG00000116745	1	68894505	68915642	N	Y	N	14	1602	38.82
DEPDC1	ENSG00000024526	1	68939835	68962904	N	N	N	12	2436	34.94
LRRC7	ENSG00000033122	1	70034081	70589164	N	Y	Y	25	4614	35.28
LRRC40	ENSG00000066557	1	70610488	70671303	N	N	Y	15	1809	35.14
SRSF11	ENSG00000116754	1	70671365	70718735	N	N	Y	13	1455	37.01
ANKRD13C	ENSG00000118454	1	70726271	70820417	N	N	N	13	1626	37.55
HHLA3	ENSG00000197568	1	70820488	70851022	N	N	N	4	465	42.14
CTH	ENSG00000116761	1	70876901	70905534	N	Y	N	12	1218	39.51
PTGER3	ENSG00000050628	1	71318036	71513491	N	Y	Y	5	1290	38.05
ZRANB2	ENSG00000132485	1	71528974	71546980	N	N	N	10	993	34.21
NEGR1	ENSG00000172260	1	71868625	72748417	N	N	N	7	1065	34.92
LRRIQ3	ENSG00000162620	1	74491699	74663871	N	N	N	7	1875	34
FPGT	ENSG00000254685	1	74663922	74699770	N	N	N	4	1785	34.31
FPGT-TNNI3K	ENSG00000116783	1	74663926	75009666	N	N	N	27	2811	36.51
LRRC53	ENSG00000162621	1	74937776	74978298	N	N	N	4	1530	37.67
C1orf173	ENSG00000178965	1	75033795	75139422	N	N	N	15	4593	36.46
CRYZ	ENSG00000116791	1	75171170	75199092	N	N	N	9	990	39.61
TYW3	ENSG00000162623	1	75198836	75232362	N	N	N	6	780	40.26
LHX8	ENSG00000162624	1	75594119	75627218	Y	N	N	10	1071	39.78
SLC44A5	ENSG00000137968	1	75667816	76076801	N	N	N	24	2160	36.99
ACADM	ENSG00000117054	1	76190036	76253260	Y	N	N	13	1365	40.45
RABGGTB	ENSG00000137955	1	76251879	76260764	N	N	Y	9	996	37.87
MSH4	ENSG00000057468	1	76262567	76378923	N	Y	N	20	2811	37.01
ASB17	ENSG00000154007	1	76384558	76398116	N	N	N	3	888	35.16
ST6GALNAC3	ENSG00000184005	1	76540404	77100286	N	N	N	5	918	38.78
ST6GALNAC5	ENSG00000117069	1	77333126	77531396	N	N	Y	5	1011	39.93
PIGK	ENSG00000142892	1	77554675	77685115	N	N	N	11	1188	35.83
AK5	ENSG00000154027	1	77747736	78025651	N	N	Y	14	1689	39.61
ZZZ3	ENSG00000036549	1	78028101	78149104	N	N	N	15	2712	37.17
USP33	ENSG00000077254	1	78161672	78225537	N	N	Y	25	2829	38.35
FAM73A	ENSG00000180488	1	78245309	78344106	N	N	N	16	1899	39.67
NEXN	ENSG00000162614	1	78354198	78409580	N	N	N	13	2028	39.06
FUBP1	ENSG00000162613	1	78409740	78444794	N	N	N	21	1998	36.32
DNAJB4	ENSG00000162616	1	78444859	78483648	N	N	N	3	1014	37.07
GIPC2	ENSG00000137960	1	78445226	78604133	N	N	N	6	948	38.79
PTGFR	ENSG00000122420	1	78769568	79005434	N	Y	N	4	1080	37.27
IFI44L	ENSG00000137959	1	79085607	79108484	N	N	N	9	1359	34.05
IFI44	ENSG00000137965	1	79115481	79129763	N	N	N	9	1335	35.31
ELTD1	ENSG00000162618	1	79355449	79472403	N	N	N	15	2073	33.94
LPHN2	ENSG00000117114	1	81771845	82458107	N	N	N	26	4425	36.78
TTLL7	ENSG00000137941	1	84330711	84464833	N	N	Y	21	2664	35.53
PRKACB	ENSG00000142875	1	84543745	84704181	N	Y	Y	10	1197	34.7
SAMD13	ENSG00000203943	1	84764049	84855640	N	N	N	4	369	39.5
DNASE2B	ENSG00000137976	1	84864215	84880701	N	Y	N	6	1086	39.33
RPF1	ENSG00000117133	1	84944942	84963473	N	N	N	9	1050	37.23
GNG5	ENSG00000174021	1	84964008	84972248	N	N	N	4	207	40.66
CTBS	ENSG00000117151	1	85018804	85040163	N	N	N	7	1158	37.62
C1orf180	ENSG00000180869	1	85093913	85100703	N	N	N	3	372	41.95
SSX2IP	ENSG00000117155	1	85109390	85156486	N	N	Y	14	1845	37.23
LPAR3	ENSG00000171517	1	85277285	85358896	N	Y	N	3	1062	41.6
MCOLN2	ENSG00000153898	1	85391268	85462796	N	N	N	14	1701	40.38
WDR63	ENSG00000162643	1	85464830	85598821	N	N	N	23	2676	39.43
MCOLN3	ENSG00000055732	1	85483765	85514182	Y	N	N	13	1662	40.77
SYDE2	ENSG00000097096	1	85622556	85666729	N	N	N	7	3585	36.31
C1orf52	ENSG00000162642	1	85715639	85725355	N	N	Y	3	549	39.67
BCL10	ENSG00000142867	1	85731931	85743771	Y	N	N	3	702	40.74
DDAH1	ENSG00000153904	1	85784168	86044046	Y	N	Y	6	858	39.19
CYR61	ENSG00000142871	1	86046444	86049645	Y	N	N	5	1146	50.25
ZNHIT6	ENSG00000117174	1	86115106	86174116	N	N	N	10	1413	36.46
COL24A1	ENSG00000171502	1	86194916	86622626	N	N	N	60	5145	36.41
ODF2L	ENSG00000122417	1	86812508	86862025	N	N	N	18	2022	34.88
CLCA2	ENSG00000137975	1	86889769	86922241	N	Y	N	14	2832	37.98
CLCA1	ENSG00000016490	1	86934051	86965972	N	N	N	14	2745	40.09
CLCA4	ENSG00000016602	1	87012761	87046437	N	N	N	14	2760	37.99
SH3GLB1	ENSG00000097033	1	87170259	87213867	N	Y	N	11	1161	36.11
RP4-604K5.1	ENSG00000183291	1	87328132	87380107	N	N	N	5	489	37.87
HS2ST1	ENSG00000153936	1	87380331	87634887	Y	N	N	7	1071	38.72
LMO4	ENSG00000143013	1	87794151	87812788	Y	N	Y	5	498	43.02
PKN2	ENSG00000065243	1	89149905	89301938	N	N	N	22	2955	36.25
GTF2B	ENSG00000137947	1	89318615	89357627	N	N	N	7	951	39.88
CCBL2	ENSG00000137944	1	89401456	89458636	N	N	N	14	1365	38.59
RBMXL1	ENSG00000213516	1	89445139	89458643	N	N	N	3	1173	41.18
GBP3	ENSG00000117226	1	89472349	89488577	N	N	N	11	1788	40.11
GBP1	ENSG00000117228	1	89518002	89531043	N	N	N	11	1779	38.12
GBP2	ENSG00000162645	1	89571815	89616139	N	Y	N	15	1776	38
GBP7	ENSG00000213512	1	89597434	89641723	N	N	N	11	1917	37.88
GBP4	ENSG00000162654	1	89646831	89664615	N	N	N	11	1923	38.85
GBP5	ENSG00000154451	1	89724633	89738544	N	N	N	12	1761	38.32
GBP6	ENSG00000183347	1	89829617	89853719	N	N	N	11	1902	38.89
LRRC8B	ENSG00000197147	1	89990395	90063423	N	N	Y	6	2412	38.63
LRRC8C	ENSG00000171488	1	90098631	90398809	N	N	N	3	2412	40.42
LRRC8D	ENSG00000171492	1	90286573	90402170	N	N	Y	3	2577	40.31
ZNF326	ENSG00000162664	1	90460671	90494097	N	N	N	12	1749	35.74
BARHL2	ENSG00000143032	1	91177159	91182794	Y	N	N	3	1164	50.6
ZNF644	ENSG00000122482	1	91380859	91487829	N	N	N	6	3984	36.39
HFM1	ENSG00000162669	1	91726323	91870426	N	N	N	39	4308	37.16
CDC7	ENSG00000097046	1	91966408	91991321	Y	N	N	12	1725	36.66
TGFBR3	ENSG00000069702	1	92145902	92371892	Y	N	N	17	2556	42.29
BRDT	ENSG00000137948	1	92414928	92479983	N	Y	N	19	2844	39.43
EPHX4	ENSG00000172031	1	92495539	92529093	N	N	N	7	1089	38.35
BTBD8	ENSG00000189195	1	92545862	92613393	N	N	N	9	1137	39.23
KIAA1107	ENSG00000069712	1	92632542	92650280	N	N	Y	9	4230	34.59
C1orf146	ENSG00000203910	1	92683497	92711370	N	N	N	6	543	39.2
GLMN	ENSG00000174842	1	92711959	92764544	N	N	N	19	1785	38
RPAP2	ENSG00000122484	1	92764522	92853730	N	N	N	13	1839	38.01
GFI1	ENSG00000162676	1	92940319	92952433	N	Y	N	7	1269	55.35
EVI5	ENSG00000067208	1	92974253	93257961	N	N	N	19	2466	38.19
RPL5	ENSG00000122406	1	93297615	93307481	N	N	N	8	894	40.26
FAM69A	ENSG00000154511	1	93307724	93427057	N	N	N	5	1287	39.49
MTF2	ENSG00000143033	1	93544792	93604638	Y	N	N	15	1782	37.37
TMED5	ENSG00000117500	1	93615299	93646285	N	N	N	4	690	38.24
CCDC18	ENSG00000122483	1	93645476	93744287	N	N	N	29	4526	36.98
DR1	ENSG00000117505	1	93811445	93828149	N	N	N	3	531	36.34
FNBP1L	ENSG00000137942	1	93913658	94020218	N	N	Y	17	1818	37.35
BCAR3	ENSG00000137936	1	94027347	94312706	N	Y	N	12	2478	45.08
DNTTIP2	ENSG00000067334	1	94333373	94345474	N	N	N	7	2271	38.94
GCLM	ENSG00000023909	1	94350761	94374966	N	Y	N	7	825	36.34
ABCA4	ENSG00000198691	1	94458393	94586688	N	Y	N	50	6822	46.44
ARHGAP29	ENSG00000137962	1	94614544	94740624	N	N	N	23	3786	38.07
ABCD3	ENSG00000117528	1	94883933	94984222	N	N	N	24	2052	37.07
F3	ENSG00000117525	1	94994781	95007356	Y	N	N	6	888	43.51
SLC44A3	ENSG00000143036	1	95285898	95360802	N	N	N	15	1962	43.92
CNN3	ENSG00000117519	1	95362507	95392834	N	N	N	8	990	43.02
ALG14	ENSG00000172339	1	95448297	95538501	N	N	N	4	651	40.37
TMEM56	ENSG00000152078	1	95582894	95663163	N	N	N	7	792	39
RWDD3	ENSG00000122481	1	95699711	95712781	N	N	N	4	804	40.77
PTBP2	ENSG00000117569	1	97187221	97280349	N	N	Y	15	1647	35.84
DPYD	ENSG00000188641	1	97543299	98386605	N	N	N	23	3078	35.09
SNX7	ENSG00000162627	1	99127236	99226056	N	N	N	9	1356	36.06
LPPR5	ENSG00000117598	1	99355806	99470588	N	N	N	6	966	37.21
RP4-788L13.1	ENSG00000117600	1	99729509	99775146	N	N	Y	7	2292	36.26
PALMD	ENSG00000099260	1	100111499	100160097	N	N	N	8	1656	37.53
FRRS1	ENSG00000156869	1	100174259	100232187	N	N	N	17	1881	38.03
AGL	ENSG00000162688	1	100315640	100389579	N	N	N	34	4599	36.47
SLC35A3	ENSG00000117620	1	100435345	100492535	N	N	N	8	1104	37.39
HIAT1	ENSG00000156875	1	100503653	100548933	N	N	N	12	1473	39.5
SASS6	ENSG00000156876	1	100549119	100598511	N	N	N	17	1974	36.48
TRMT13	ENSG00000122435	1	100598706	100616053	N	N	N	11	1446	35.8
LRRC39	ENSG00000122477	1	100614409	100643771	N	N	N	11	1020	36.29
DBT	ENSG00000137992	1	100659736	100715390	Y	N	N	11	1449	39.16
RTCA	ENSG00000137996	1	100731763	100758325	N	N	N	12	1140	39.07
CDC14A	ENSG00000079335	1	100810584	100985833	N	N	N	15	1872	38.39
GPR88	ENSG00000181656	1	101003693	101007574	N	N	Y	2	1155	52.47
VCAM1	ENSG00000162692	1	101185305	101204601	Y	N	N	9	2220	36.92
EXTL2	ENSG00000162694	1	101337943	101361554	N	N	N	5	993	38.7
SLC30A7	ENSG00000162695	1	101361632	101447309	N	Y	N	11	1131	35.85
DPH5	ENSG00000117543	1	101455179	101491644	N	N	N	8	858	37.71
S1PR1	ENSG00000170989	1	101702444	101707074	Y	N	N	2	1149	47.92
OLFM3	ENSG00000118733	1	102268130	102462586	N	N	Y	6	1437	35.12
COL11A1	ENSG00000060718	1	103342023	103574052	Y	N	Y	67	5457	33.13
RNPC3	ENSG00000185946	1	104068313	104097854	N	N	N	16	1554	35.04
AMY2B	ENSG00000240038	1	104096437	104122156	N	N	N	12	1536	34.92
AMY2A	ENSG00000243480	1	104159999	104168402	N	N	N	10	1536	33.56
AMY1A	ENSG00000237763	1	104197912	104207173	N	N	N	11	1536	34.57
AMY1B	ENSG00000174876	1	104230037	104239302	N	N	N	11	1536	34.59
AMY1C	ENSG00000187733	1	104293028	104301312	N	N	N	10	1536	34.04
PRMT6	ENSG00000198890	1	107599267	107601916	N	N	N	1	1128	50.6
NTNG1	ENSG00000162631	1	107682629	108026080	N	N	N	9	1620	37.35
VAV3	ENSG00000134215	1	108113782	108507766	N	Y	N	28	2628	37.54
SLC25A24	ENSG00000085491	1	108676658	108743471	N	N	N	10	1434	39.44
NBPF4	ENSG00000196427	1	108765087	108786703	N	N	N	14	1917	44.98
NBPF6	ENSG00000186086	1	108918421	109013624	N	N	N	16	2004	40.25
FAM102B	ENSG00000162636	1	109102711	109187522	N	N	N	11	1083	39.64
HENMT1	ENSG00000162639	1	109190912	109204148	N	N	N	9	1275	41.28
PRPF38B	ENSG00000134186	1	109234945	109244425	N	N	N	6	1641	37.93
FNDC7	ENSG00000143107	1	109255279	109285365	N	N	N	12	2205	42.76
STXBP3	ENSG00000116266	1	109289296	109352148	Y	N	Y	19	1779	36.03
AKNAD1	ENSG00000162641	1	109358520	109506106	N	N	N	16	2511	41.11
GPSM2	ENSG00000121957	1	109417972	109473044	N	Y	N	16	2055	38.69
CLCC1	ENSG00000121940	1	109472130	109506111	N	N	N	12	1656	41.68
WDR47	ENSG00000085433	1	109512836	109584850	N	N	Y	15	2784	41.23
TAF13	ENSG00000197780	1	109605121	109618624	N	N	N	4	375	43.54
TMEM167B	ENSG00000215717	1	109633357	109639556	N	N	N	3	225	42.08
C1orf194	ENSG00000179902	1	109648573	109656479	N	N	N	5	510	47.38
KIAA1324	ENSG00000116299	1	109656301	109749401	N	N	N	22	3042	45.89
SARS	ENSG00000031698	1	109756540	109780791	N	N	N	12	1611	43.12
CELSR2	ENSG00000143126	1	109792641	109818377	N	Y	Y	34	8772	59.75
PSRC1	ENSG00000134222	1	109822178	109825808	N	N	Y	7	1092	53.68
MYBPHL	ENSG00000221986	1	109834987	109849663	N	N	N	9	1065	49.85
SORT1	ENSG00000134243	1	109852192	109940573	N	Y	N	20	2496	42.27
PSMA5	ENSG00000143106	1	109941653	109969062	N	N	N	9	726	40.75
SYPL2	ENSG00000143028	1	110009180	110024759	N	Y	N	6	819	49.25
ATXN7L2	ENSG00000162650	1	110026101	110035426	N	N	N	11	2169	56.87
CYB561D1	ENSG00000174151	1	110036674	110045554	N	N	N	3	756	52.44
AMIGO1	ENSG00000181754	1	110046797	110052360	N	N	N	2	1482	53.22
GPR61	ENSG00000156097	1	110082494	110091028	N	N	N	5	1356	49.33
GNAI3	ENSG00000065135	1	110091233	110136975	N	Y	N	9	1065	38.75
GNAT2	ENSG00000134183	1	110145889	110155679	N	Y	N	8	1065	44.42
AMPD2	ENSG00000116337	1	110158726	110174673	N	N	N	18	2640	56.74
GSTM4	ENSG00000168765	1	110198703	110208118	N	N	N	8	657	49.68
GSTM2	ENSG00000213366	1	110210644	110252173	N	N	N	8	663	46.7
GSTM1	ENSG00000134184	1	110230436	110251307	N	Y	N	8	714	46.35
GSTM5	ENSG00000134201	1	110254877	110260888	N	N	N	8	714	52.64
GSTM3	ENSG00000134202	1	110276554	110284384	N	N	N	9	678	46.74
EPS8L3	ENSG00000198758	1	110292702	110306649	N	N	N	19	1785	53.84
CSF1	ENSG00000184371	1	110452864	110473614	Y	N	N	9	1665	54.81
AHCYL1	ENSG00000168710	1	110527308	110566357	N	N	Y	17	1593	40.97
FAM40A	ENSG00000143093	1	110574199	110597263	N	N	N	21	2514	48.59
ALX3	ENSG00000156150	1	110602616	110613234	N	Y	N	4	1032	58.74
UBL4B	ENSG00000186150	1	110655062	110656569	N	N	N	1	525	57.03
SLC6A17	ENSG00000197106	1	110693108	110744824	N	N	N	12	2184	50.59
KCNC4	ENSG00000116396	1	110753965	110825722	N	N	N	5	1908	49.53
RBM15	ENSG00000162775	1	110881128	110889299	Y	N	N	3	2934	44.02
SLC16A4	ENSG00000168679	1	110905470	110933704	N	N	N	9	1464	40.4
HBXIP	ENSG00000134248	1	110943871	110950564	N	N	N	4	522	42.55
PROK1	ENSG00000143125	1	110993822	110999976	N	N	N	3	318	50.74
KCNA10	ENSG00000143105	1	111059839	111061797	N	N	N	1	1536	50.33
KCNA2	ENSG00000177301	1	111136202	111174096	Y	N	N	2	1500	46.86
KCNA3	ENSG00000177272	1	111214310	111217655	N	Y	N	1	1728	53.35
CD53	ENSG00000143119	1	111415772	111442550	N	N	N	8	660	39.22
LRIF1	ENSG00000121931	1	111489807	111506701	N	N	N	4	2310	36.58
DRAM2	ENSG00000156171	1	111659955	111682838	N	N	N	9	801	37.94
CEPT1	ENSG00000134255	1	111682249	111727724	N	N	N	9	1251	36.54
DENND2D	ENSG00000162777	1	111729796	111747157	N	N	N	12	1416	50.09
CHI3L2	ENSG00000064886	1	111743393	111786062	N	N	N	11	1173	44.63
CHIA	ENSG00000134216	1	111833484	111863188	N	N	N	11	1431	38.26
C1orf88	ENSG00000173947	1	111888910	111895635	Y	N	N	6	576	42.28
OVGP1	ENSG00000085465	1	111956936	111970399	N	N	N	11	2037	45.7
WDR77	ENSG00000116455	1	111982512	111991998	Y	N	N	10	1029	44.57
ATP5F1	ENSG00000116459	1	111991486	112005395	N	N	N	7	771	39.38
C1orf162	ENSG00000143110	1	112016414	112021134	N	N	N	6	468	41.81
ADORA3	ENSG00000121933	1	112025970	112106584	N	Y	N	6	1044	41.45
RAP1A	ENSG00000116473	1	112084840	112259313	Y	N	N	8	555	39.31
FAM212B	ENSG00000197852	1	112223252	112298446	N	N	N	2	894	43.96
DDX20	ENSG00000064703	1	112297867	112310638	Y	N	N	11	2475	40.24
KCND3	ENSG00000171385	1	112313284	112531777	N	N	Y	8	1968	47.27
CTTNBP2NL	ENSG00000143079	1	112938803	113003786	N	N	N	6	1920	39.42
WNT2B	ENSG00000134245	1	113009163	113065288	N	Y	N	5	1176	44.82
ST7L	ENSG00000007341	1	113066140	113163447	N	N	N	15	1728	39.05
CAPZA1	ENSG00000116489	1	113161795	113214241	N	N	N	10	861	40.34
MOV10	ENSG00000155363	1	113215763	113243368	N	N	N	21	3012	48.61
RHOC	ENSG00000155366	1	113243728	113250056	N	Y	N	7	687	57.18
PPM1J	ENSG00000155367	1	113245236	113258099	N	N	N	10	1518	55.88
FAM19A3	ENSG00000184599	1	113263041	113269857	N	N	N	5	510	50.43
SLC16A1	ENSG00000155380	1	113454469	113499635	N	N	N	5	1503	40.76
LRIG2	ENSG00000198799	1	113615831	113669822	N	N	N	18	3198	41.18
MAGI3	ENSG00000081026	1	113933371	114228545	N	N	N	21	4446	37.11
PHTF1	ENSG00000116793	1	114239453	114302111	N	N	N	18	2289	39.1
RSBN1	ENSG00000081019	1	114304454	114355098	N	N	Y	7	2409	37.22
PTPN22	ENSG00000134242	1	114356433	114414381	N	Y	N	21	2424	38.85
BCL2L15	ENSG00000188761	1	114420790	114430169	N	N	N	4	492	42.33
AP4B1	ENSG00000134262	1	114437370	114447823	N	Y	N	11	2220	43.25
DCLRE1B	ENSG00000118655	1	114447763	114456708	Y	N	N	4	1599	45.65
HIPK1	ENSG00000163349	1	114471814	114520426	N	Y	N	16	3846	39.82
OLFML3	ENSG00000116774	1	114522063	114524876	N	Y	N	3	1221	51.95
SYT6	ENSG00000134207	1	114631914	114696541	N	N	N	7	1533	48.58
TRIM33	ENSG00000197323	1	114935399	115053781	Y	N	N	20	3384	38.2
BCAS2	ENSG00000116752	1	115110178	115124260	N	N	N	7	678	40.33
DENND2C	ENSG00000175984	1	115125469	115213043	N	N	N	21	2787	39.41
AMPD1	ENSG00000116748	1	115215719	115238239	N	N	N	16	2343	40.74
NRAS	ENSG00000213281	1	115247090	115259515	N	Y	N	7	570	39
CSDE1	ENSG00000009307	1	115259534	115301297	N	N	N	20	2535	38.28
SIKE1	ENSG00000052723	1	115312100	115323306	N	N	N	5	636	36.9
SYCP1	ENSG00000198765	1	115397424	115537991	N	Y	N	32	2931	35.32
TSHB	ENSG00000134200	1	115572415	115576941	N	N	N	2	417	33.86
TSPAN2	ENSG00000134198	1	115590632	115632121	N	N	N	8	666	43.44
NGF	ENSG00000134259	1	115828539	115880857	Y	N	N	3	726	43.8
VANGL1	ENSG00000173218	1	116184574	116240845	N	Y	N	7	1575	45.32
CASQ2	ENSG00000118729	1	116242628	116311402	N	Y	N	11	1200	43.23
NHLH2	ENSG00000177551	1	116378998	116386538	N	Y	Y	3	408	46.33
SLC22A15	ENSG00000163393	1	116519119	116612675	N	N	N	12	1644	39.5
MAB21L3	ENSG00000173212	1	116654376	116677861	N	N	N	7	1089	43.49
ATP1A1	ENSG00000163399	1	116915290	116952883	Y	N	N	23	3072	44.46
ATP1A1OS	ENSG00000203865	1	116941622	116961197	N	N	N	3	288	46.35
CD58	ENSG00000116815	1	117057157	117113661	N	N	N	6	753	41.62
IGSF3	ENSG00000143061	1	117117031	117210375	N	N	Y	11	3645	46.14
C1orf137	ENSG00000203864	1	117236734	117249225	N	N	N	4	297	39.77
CD2	ENSG00000116824	1	117297007	117311850	N	Y	N	5	1056	47.15
PTGFRN	ENSG00000134247	1	117452679	117532980	N	N	N	9	2640	44.19
CD101	ENSG00000134256	1	117544382	117579167	N	Y	N	10	3066	42.65
TTF2	ENSG00000116830	1	117602925	117645492	N	N	N	23	3489	40.99
TRIM45	ENSG00000134253	1	117653682	117665209	N	N	N	6	1743	46.89
VTCN1	ENSG00000134258	1	117686209	117753556	N	Y	N	6	858	42.41
MAN1A2	ENSG00000198162	1	117910071	118071494	Y	N	N	13	1926	35.34
FAM46C	ENSG00000183508	1	118148556	118170994	N	N	N	2	1176	44.16
GDAP2	ENSG00000196505	1	118412037	118472253	N	N	N	14	1494	36.6
WDR3	ENSG00000065183	1	118472343	118503049	N	N	N	27	2832	36.75
SPAG17	ENSG00000155761	1	118496484	118727846	N	N	N	49	6672	37.52
TBX15	ENSG00000092607	1	119425669	119532179	Y	N	N	8	1809	41.12
WARS2	ENSG00000116874	1	119573839	119683294	N	N	N	6	1083	38.11
HAO2	ENSG00000116882	1	119911402	119936753	N	N	N	9	1095	41.51
HSD3B2	ENSG00000203859	1	119957554	119965658	N	N	N	4	1119	43.8
HSD3B1	ENSG00000203857	1	120049821	120057681	N	N	N	4	1128	44.54
ZNF697	ENSG00000143067	1	120162045	120190396	N	N	N	3	1638	44.33
PHGDH	ENSG00000092621	1	120202421	120286838	Y	N	N	12	1602	44.18
HMGCS2	ENSG00000134240	1	120290619	120311528	N	N	N	10	1527	41.86
REG4	ENSG00000134193	1	120336641	120354283	N	N	N	6	477	43.63
ADAM30	ENSG00000134249	1	120436156	120439118	N	N	N	1	2373	43.81
NOTCH2	ENSG00000134250	1	120454176	120612240	Y	N	N	34	7416	39.74
FAM72B	ENSG00000188610	1	120837272	120855681	N	N	N	4	450	42.24
FCGR1B	ENSG00000198019	1	120926979	120935937	N	N	N	5	843	42.08
PPIAL4G	ENSG00000236334	1	143767144	143767881	N	N	N	1	495	46.21
FAM72D	ENSG00000215784	1	143896452	143913143	N	N	N	4	450	40.18
RP3-377D14.1	ENSG00000162825	1	144146808	144224481	N	N	N	91	11423	44.21
AL592284.2	ENSG00000231360	1	144339738	144521058	N	N	N	2	807	39.62
PPIAL4B	ENSG00000255854	1	144363462	144364246	N	N	N	1	495	45.22
NBPF9	ENSG00000168614	1	144811744	144830302	N	N	N	15	2051	43.61
PDE4DIP	ENSG00000178104	1	144836157	145076186	N	N	Y	47	7449	40.99
NOTCH2NL	ENSG00000213240	1	145209119	145291954	N	N	N	6	711	39.19
RP11-458D21.5	ENSG00000255168	1	145209145	145319796	N	N	N	23	717	40.47
NBPF10	ENSG00000163386	1	145289772	145370303	N	N	N	84	10662	43.94
HFE2	ENSG00000168509	1	145413095	145417545	N	Y	N	4	1281	49.05
TXNIP	ENSG00000117289	1	145438469	145442635	N	Y	N	8	1176	42.5
POLR3GL	ENSG00000121851	1	145456236	145470388	N	N	N	8	657	44.9
ANKRD34A	ENSG00000181039	1	145470508	145475646	N	N	Y	4	1491	55.91
LIX1L	ENSG00000152022	1	145477085	145501669	N	N	N	6	1014	43.6
RBM8A	ENSG00000131795	1	145507598	145511444	N	N	N	6	525	45.2
GNRHR2	ENSG00000211451	1	145509752	145516076	N	N	N	4	879	44.54
PEX11B	ENSG00000131779	1	145516252	145523730	Y	N	Y	4	780	45.5
ITGA10	ENSG00000143127	1	145524891	145543868	N	Y	Y	30	3504	48.42
ANKRD35	ENSG00000198483	1	145549230	145568526	N	N	N	14	3006	48.18
PIAS3	ENSG00000131788	1	145575233	145586546	N	N	N	14	1887	52.28
NUDT17	ENSG00000186364	1	145586115	145590461	N	N	N	8	987	52.8
POLR3C	ENSG00000186141	1	145592605	145611025	N	N	N	15	1605	43.11
RNF115	ENSG00000121848	1	145611036	145690661	N	N	N	9	915	41.94
CD160	ENSG00000117281	1	145695798	145715614	N	N	N	5	546	42.03
PDZK1	ENSG00000174827	1	145726918	145764074	N	Y	N	9	1560	44.63
GPR89A	ENSG00000117262	1	145764411	145827103	N	N	N	14	1368	38.92
GPR89C	ENSG00000196644	1	145883868	145924373	N	N	N	9	963	39.05
WI2-3658N16.1	ENSG00000232637	1	146032648	146253110	N	N	N	38	5072	42.86
NBPF11	ENSG00000152042	1	146032648	146082765	N	N	N	20	2598	45.45
NBPF12	ENSG00000186275	1	146373546	146467744	N	N	N	82	9996	44.07
PRKAB2	ENSG00000131791	1	146626685	146644129	N	Y	N	8	819	39.83
FMO5	ENSG00000131781	1	146646930	146714700	N	N	N	9	1602	40.78
CHD1L	ENSG00000131778	1	146714291	146767443	N	N	N	23	2694	40.27
BCL9	ENSG00000116128	1	147013182	147098017	N	N	N	10	4281	42.09
ACP6	ENSG00000162836	1	147119170	147142618	N	N	N	10	1287	43.98
GJA5	ENSG00000143140	1	147228332	147245484	Y	N	N	2	1077	46.16
GJA8	ENSG00000121634	1	147374946	147381393	N	Y	N	2	1302	45.34
GPR89B	ENSG00000188092	1	147400506	147465753	N	N	N	14	1368	39.86
NBPF24	ENSG00000203836	1	147574428	147624601	N	N	N	21	2598	45.46
PPIAL4A	ENSG00000255963	1	147954635	147955419	N	N	N	1	495	45.1
NBPF14	ENSG00000122497	1	148003642	148025863	N	N	N	22	2783	43.72
PPIAL4D	ENSG00000256374	1	148201752	148202536	N	N	N	1	495	45.73
NBPF20	ENSG00000203832	1	148250249	148347506	N	N	N	111	13866	44.24
NBPF15	ENSG00000243452	1	148555979	148596267	N	N	N	21	2013	42.75
NBPF16	ENSG00000203827	1	148739443	148758311	N	N	N	16	2013	43.32
HIST2H3PS2	ENSG00000203818	1	149398877	149400542	N	N	N	2	411	53
FAM72C	ENSG00000203817	1	149438750	149459549	N	N	N	2	220	40.14
PPIAL4C	ENSG00000198161	1	149553003	149553787	N	N	N	1	495	45.35
AL358813.2	ENSG00000203815	1	149675978	149676609	N	N	N	1	510	57.28
FCGR1A	ENSG00000150337	1	149754227	149764074	N	Y	N	6	1125	41.93
HIST2H2BF	ENSG00000203814	1	149754245	149783928	N	N	N	2	501	41.91
HIST2H3D	ENSG00000183598	1	149784826	149785236	N	N	N	1	411	67.4
HIST2H4A	ENSG00000183941	1	149804221	149811339	N	N	N	2	312	46.89
HIST2H3C	ENSG00000203811	1	149811110	149812765	N	N	N	1	411	61.23
HIST2H2AA3	ENSG00000183558	1	149813505	149814478	N	N	N	1	393	60.88
HIST2H2AA4	ENSG00000203812	1	149822643	149823191	N	N	N	1	393	61.75
HIST2H3A	ENSG00000203852	1	149824181	149825836	N	N	N	1	411	61.23
HIST2H4B	ENSG00000182217	1	149825607	149832714	N	N	N	2	312	46.89
HIST2H2BE	ENSG00000184678	1	149856010	149858232	N	N	N	1	381	47.95
BOLA1	ENSG00000178096	1	149858486	149872351	N	N	N	2	414	46.36
HIST2H2AC	ENSG00000184260	1	149858525	149858961	N	N	N	1	390	60.87
HIST2H2AB	ENSG00000184270	1	149859019	149859466	N	N	N	1	393	60.71
SV2A	ENSG00000159164	1	149874870	149889434	Y	N	Y	13	2229	52.21
SF3B4	ENSG00000143368	1	149895209	149900236	N	N	N	6	1275	48.41
MTMR11	ENSG00000014914	1	149900543	149908791	N	N	N	17	2130	50.01
OTUD7B	ENSG00000163113	1	149912231	149982625	N	N	N	12	2532	42.22
VPS45	ENSG00000136631	1	150039369	150117505	N	N	N	15	1713	39.12
PLEKHO1	ENSG00000023902	1	150121373	150132260	N	Y	N	6	1230	52.6
ANP32E	ENSG00000143401	1	150190717	150208504	N	Y	N	7	807	42.57
CA14	ENSG00000118298	1	150230169	150237478	N	Y	N	11	1014	50.42
APH1A	ENSG00000117362	1	150237804	150241980	Y	N	N	7	798	53.84
C1orf54	ENSG00000118292	1	150240600	150253327	N	N	N	8	396	46.5
C1orf51	ENSG00000159208	1	150254953	150259505	N	N	N	6	1158	47.53
MRPS21	ENSG00000187145	1	150266289	150281414	N	N	N	3	264	46.41
AL138795.1	ENSG00000215857	1	150273648	150277452	N	N	N	6	318	46.12
PRPF3	ENSG00000117360	1	150293925	150325671	Y	N	N	16	2052	44.24
RPRD2	ENSG00000163125	1	150335567	150449042	N	N	N	11	4386	41.76
TARS2	ENSG00000143374	1	150459887	150480078	N	N	N	18	2157	48.51
ECM1	ENSG00000143369	1	150480538	150486265	N	Y	N	10	1704	55.19
ADAMTSL4	ENSG00000143382	1	150521884	150533413	N	N	N	19	3294	60.07
AL356356.1	ENSG00000225996	1	150521897	150524367	N	N	N	3	465	60.38
C1orf138	ENSG00000203804	1	150533480	150533969	N	N	N	1	390	63.06
MCL1	ENSG00000143384	1	150547032	150552066	N	Y	N	3	1053	44.43
ENSA	ENSG00000143420	1	150573327	150602088	N	N	Y	5	564	45.32
GOLPH3L	ENSG00000143457	1	150618701	150669630	N	N	N	5	858	40.09
HORMAD1	ENSG00000143452	1	150670536	150693364	N	Y	N	15	1185	36.71
CTSS	ENSG00000163131	1	150702551	150738433	N	Y	N	8	996	39.37
CTSK	ENSG00000143387	1	150768684	150780799	N	Y	N	8	990	43
ARNT	ENSG00000143437	1	150782181	150849244	Y	N	N	22	2370	41.21
SETDB1	ENSG00000143379	1	150898739	150937213	Y	N	N	22	3876	44.16
CERS2	ENSG00000143418	1	150933059	150947479	N	Y	N	11	1143	52.38
ANXA9	ENSG00000143412	1	150954493	150968110	N	N	N	14	1038	49.92
FAM63A	ENSG00000143409	1	150969025	150980851	N	N	N	11	1554	49.19
PRUNE	ENSG00000143363	1	150980896	151008189	N	Y	N	8	1362	46.61
BNIPL	ENSG00000163141	1	151009046	151020076	N	N	N	10	1074	46.98
C1orf56	ENSG00000143443	1	151020216	151024462	N	N	N	2	1026	48.39
CDC42SE1	ENSG00000197622	1	151023447	151032249	N	N	N	6	240	49.99
MLLT11	ENSG00000213190	1	151030234	151040970	N	N	Y	2	273	46.39
GABPB2	ENSG00000143458	1	151043054	151098018	N	Y	N	9	1347	44.85
SEMA6C	ENSG00000143434	1	151104161	151119104	N	Y	N	20	2889	57.44
TNFAIP8L2	ENSG00000163154	1	151129105	151132225	N	Y	N	2	555	51.62
LYSMD1	ENSG00000163155	1	151132224	151138424	N	N	N	3	684	46.07
SCNM1	ENSG00000163156	1	151138498	151142773	N	N	N	7	693	49.11
TMOD4	ENSG00000163157	1	151142462	151148492	N	N	N	10	1038	50.42
VPS72	ENSG00000163159	1	151142463	151167797	N	N	Y	6	1128	47.36
PIP5K1A	ENSG00000143398	1	151170425	151222012	N	Y	N	16	1689	45.21
PSMD4	ENSG00000159352	1	151227179	151239955	Y	N	Y	10	1143	47.67
RP11-126K1.2	ENSG00000232671	1	151252500	151254405	N	N	N	2	180	54.93
ZNF687	ENSG00000143373	1	151254094	151264381	N	N	N	10	3714	58.33
PI4KB	ENSG00000143393	1	151264273	151300191	N	N	Y	12	2487	48.45
RFX5	ENSG00000143390	1	151313116	151319833	N	Y	N	11	1851	49.78
SELENBP1	ENSG00000143416	1	151336778	151345209	N	N	N	12	1419	54.96
PSMB4	ENSG00000159377	1	151372010	151374420	N	N	N	7	795	49.27
POGZ	ENSG00000143442	1	151375200	151431941	N	N	N	19	4233	41.79
CGN	ENSG00000143375	1	151482986	151511168	N	N	N	21	3612	49.43
TUFT1	ENSG00000143367	1	151512781	151556059	N	N	N	14	1230	45.93
SNX27	ENSG00000143376	1	151584541	151671567	Y	N	Y	12	1626	40.41
CELF3	ENSG00000159409	1	151674880	151689290	N	Y	Y	14	1400	57.78
RIIAD1	ENSG00000178796	1	151682909	151702281	N	N	N	9	309	51.01
AL589765.1	ENSG00000240510	1	151682909	151702070	N	N	N	9	414	50.91
MRPL9	ENSG00000143436	1	151732119	151736040	N	N	N	7	804	48.42
OAZ3	ENSG00000143450	1	151735445	151743808	N	Y	N	6	612	48.76
TDRKH	ENSG00000182134	1	151742583	151763892	N	N	N	14	1686	43.72
LINGO4	ENSG00000213171	1	151772740	151778630	N	N	N	2	1782	55.36
RORC	ENSG00000143365	1	151778547	151804348	N	Y	N	12	1719	53.08
C2CD4D	ENSG00000225556	1	151810295	151813033	N	N	N	2	1062	66.3
THEM5	ENSG00000196407	1	151818220	151826173	N	N	N	5	752	52.15
THEM4	ENSG00000159445	1	151846060	151882284	N	Y	N	6	723	42.1
S100A10	ENSG00000197747	1	151955391	151966866	N	Y	N	3	294	45.97
S100A11	ENSG00000163191	1	152004982	152020383	N	Y	N	3	318	45.08
TCHHL1	ENSG00000182898	1	152056620	152061540	N	N	N	3	2715	42.57
TCHH	ENSG00000159450	1	152078793	152086556	N	N	N	2	5832	53.85
RPTN	ENSG00000215853	1	152126071	152131704	N	N	N	3	2355	44.75
HRNR	ENSG00000197915	1	152184558	152196669	N	N	N	3	8553	50.91
FLG	ENSG00000143631	1	152274651	152297679	Y	N	N	3	12186	44
FLG2	ENSG00000143520	1	152321213	152332482	N	N	N	3	7176	45.82
CRNN	ENSG00000143536	1	152381719	152386739	N	N	N	3	1488	49.09
LCE5A	ENSG00000186207	1	152483320	152484653	N	N	N	2	357	50.3
CRCT1	ENSG00000169509	1	152486978	152488486	N	N	N	2	300	55.4
LCE3E	ENSG00000185966	1	152538130	152539248	N	N	N	2	279	54.16
LCE3D	ENSG00000163202	1	152551857	152552980	N	N	N	2	279	54.63
LCE3C	ENSG00000244057	1	152573138	152573562	N	N	N	1	285	57.41
LCE3B	ENSG00000187238	1	152586287	152586574	N	N	N	1	288	64.58
LCE3A	ENSG00000185962	1	152595310	152595579	N	N	N	1	270	64.81
LCE2D	ENSG00000187223	1	152635872	152637135	N	N	N	2	333	49.37
LCE2C	ENSG00000187180	1	152647771	152649050	N	N	N	2	333	49.3
LCE2B	ENSG00000159455	1	152647771	152659877	N	N	N	2	333	43.33
LCE2A	ENSG00000187173	1	152670840	152671918	N	N	N	2	321	47.82
LCE4A	ENSG00000187170	1	152680636	152681967	N	N	N	2	300	47.6
C1orf68	ENSG00000198854	1	152691082	152692946	N	N	N	1	753	52.28
KPRP	ENSG00000203786	1	152730506	152734529	N	N	N	2	1740	52.51
LCE1F	ENSG00000240386	1	152748848	152749445	N	N	N	1	357	59.36
LCE1E	ENSG00000186226	1	152758690	152760902	N	N	N	2	357	48.98
LCE1D	ENSG00000172155	1	152769227	152770657	N	N	N	2	345	51.99
LCE1C	ENSG00000197084	1	152777311	152779107	N	N	N	2	357	48.75
LCE1B	ENSG00000196734	1	152784447	152785585	N	N	N	1	357	48.64
LCE1A	ENSG00000186844	1	152798523	152800665	N	N	N	1	333	47.97
LCE6A	ENSG00000235942	1	152815344	152816459	N	N	N	2	243	48.48
SMCP	ENSG00000163206	1	152850793	152857523	N	Y	N	2	351	48.94
IVL	ENSG00000163207	1	152881021	152884362	N	Y	N	2	1758	55.86
SPRR4	ENSG00000184148	1	152943142	152945050	N	N	N	2	240	48.93
SPRR1A	ENSG00000169474	1	152956557	152958289	N	N	N	1	270	45.12
SPRR3	ENSG00000163209	1	152974223	152976332	N	N	N	2	510	43.98
SPRR1B	ENSG00000169469	1	153003678	153005376	N	N	N	2	270	42.67
SPRR2D	ENSG00000163216	1	153012201	153014407	N	N	N	3	219	44.63
SPRR2A	ENSG00000241794	1	153028589	153030013	N	N	N	2	219	44
SPRR2B	ENSG00000196805	1	153042704	153113927	N	N	N	2	219	37.53
SPRR2E	ENSG00000203785	1	153065611	153078660	N	N	N	2	219	37.98
SPRR2F	ENSG00000244094	1	153084590	153085991	N	N	N	2	219	44.51
SPRR2G	ENSG00000159516	1	153122058	153123345	N	N	N	2	222	44.33
LELP1	ENSG00000203784	1	153175919	153177596	N	N	N	2	297	45.83
PRR9	ENSG00000203783	1	153190060	153191793	N	N	N	2	351	46.42
LOR	ENSG00000203782	1	153232176	153234598	N	Y	N	2	939	60.26
PGLYRP3	ENSG00000159527	1	153270338	153283194	N	Y	N	7	1026	46.94
PGLYRP4	ENSG00000163218	1	153302596	153321316	N	Y	N	9	1122	44.46
S100A9	ENSG00000163220	1	153330330	153333503	N	Y	N	3	345	52.55
S100A12	ENSG00000163221	1	153346184	153348125	N	N	N	3	279	49.33
S100A8	ENSG00000143546	1	153362508	153363664	Y	N	N	3	282	54.11
S100A7A	ENSG00000184330	1	153388945	153395701	N	N	N	2	306	48.1
S100A7L2	ENSG00000197364	1	153409471	153412503	N	N	N	3	339	50.97
S100A7	ENSG00000143556	1	153430220	153433177	N	N	N	3	306	51.15
S100A6	ENSG00000197956	1	153507075	153508720	N	N	N	3	273	58.51
S100A5	ENSG00000196420	1	153509623	153514241	N	N	N	4	333	52.52
S100A4	ENSG00000196154	1	153516089	153522612	Y	N	N	4	306	56.3
S100A3	ENSG00000188015	1	153519805	153521848	N	N	N	3	306	58.02
S100A2	ENSG00000196754	1	153533584	153540366	N	N	N	4	417	53.99
S100A16	ENSG00000188643	1	153579362	153585644	N	N	N	3	312	57.23
S100A14	ENSG00000189334	1	153586731	153589462	N	N	N	3	315	57.25
S100A13	ENSG00000189171	1	153591263	153606873	N	N	N	5	297	51.25
S100A1	ENSG00000160678	1	153600402	153604513	N	Y	N	4	444	55.62
CHTOP	ENSG00000160679	1	153606525	153618782	N	N	Y	6	747	44.31
SNAPIN	ENSG00000143553	1	153631130	153634306	Y	N	N	4	411	51.31
ILF2	ENSG00000143621	1	153634512	153643524	Y	N	N	14	1173	44.75
NPR1	ENSG00000169418	1	153651113	153666468	N	Y	N	22	3186	55.44
INTS3	ENSG00000143624	1	153700543	153746555	N	N	N	30	3129	48.26
SLC27A3	ENSG00000143554	1	153746830	153752633	N	N	N	10	2436	59.39
GATAD2B	ENSG00000143614	1	153777201	153895451	N	N	N	11	1782	43.62
DENND4B	ENSG00000198837	1	153901977	153919172	N	N	N	28	4491	56.48
CRTC2	ENSG00000160741	1	153920145	153931101	N	Y	N	14	2082	53.2
SLC39A1	ENSG00000143570	1	153931575	153940188	N	Y	N	4	975	52.25
CREB3L4	ENSG00000143578	1	153940010	153946839	N	Y	N	10	1188	52.02
JTB	ENSG00000143543	1	153946745	153950164	N	N	N	5	441	50.96
RAB13	ENSG00000143545	1	153954127	153958834	N	N	N	8	612	48.79
RPS27	ENSG00000177954	1	153963235	153964626	N	N	N	4	255	45.91
NUP210L	ENSG00000143552	1	153965161	154127592	N	Y	N	40	5667	42.89
TPM3	ENSG00000143549	1	154127784	154167124	Y	N	N	10	858	45.14
C1orf189	ENSG00000163263	1	154171848	154178809	N	N	N	4	306	46.57
C1orf43	ENSG00000143612	1	154179196	154193104	N	N	N	7	762	45.88
UBAP2L	ENSG00000143569	1	154192655	154243986	N	Y	N	26	3264	43.58
HAX1	ENSG00000143575	1	154244987	154248351	N	Y	N	7	864	49.78
AQP10	ENSG00000143595	1	154293566	154297801	N	N	N	6	906	52.64
ATP8B2	ENSG00000143515	1	154298029	154323783	N	N	N	28	3672	52.37
IL6R	ENSG00000160712	1	154377669	154441926	N	Y	N	10	1407	49.12
SHE	ENSG00000169291	1	154442248	154474589	N	N	N	6	1488	45.01
TDRD10	ENSG00000163239	1	154474695	154520623	N	N	N	12	1101	47.53
UBE2Q1	ENSG00000160714	1	154521053	154531504	N	N	N	13	1269	50.99
CHRNB2	ENSG00000160716	1	154540257	154552502	N	Y	N	6	1509	54.69
ADAR	ENSG00000160710	1	154554538	154600475	Y	N	N	15	3810	45.35
KCNN3	ENSG00000143603	1	154679902	154842756	N	Y	N	8	2196	49.37
PMVK	ENSG00000163344	1	154897210	154909467	N	N	N	5	579	49.94
PBXIP1	ENSG00000163346	1	154916552	154928599	N	N	N	11	2196	54.24
PYGO2	ENSG00000163348	1	154929502	154936329	Y	N	N	3	1221	54.77
SHC1	ENSG00000160691	1	154934774	154946871	Y	N	N	12	1755	53.79
CKS1B	ENSG00000173207	1	154947129	154951725	N	Y	N	3	240	44.4
FLAD1	ENSG00000160688	1	154955814	154965587	N	N	N	7	1764	51.25
LENEP	ENSG00000163352	1	154966062	154966791	N	N	N	1	186	54.66
ZBTB7B	ENSG00000160685	1	154975127	154990998	N	Y	N	5	1722	60.39
DCST2	ENSG00000163354	1	154990996	155006257	N	N	N	15	2322	53.65
DCST1	ENSG00000163357	1	155006300	155023406	N	N	N	17	2121	53.42
ADAM15	ENSG00000143537	1	155023042	155035252	N	Y	N	23	2592	58.25
EFNA4	ENSG00000243364	1	155036207	155042029	N	N	N	4	624	54.15
EFNA3	ENSG00000143590	1	155036224	155060014	N	Y	Y	5	717	57.57
RP11-540D14.8	ENSG00000251246	1	155036224	155059283	N	N	N	5	702	57.63
EFNA1	ENSG00000169242	1	155099936	155107333	N	Y	N	5	618	54.81
SLC50A1	ENSG00000169241	1	155107820	155111329	N	N	N	6	666	55.67
DPM3	ENSG00000179085	1	155112367	155113071	N	N	N	1	369	60.71
KRTCAP2	ENSG00000163463	1	155141884	155159747	N	N	N	5	489	56.2
TRIM46	ENSG00000163462	1	155145873	155157447	N	N	N	10	2280	57.56
MUC1	ENSG00000185499	1	155158300	155162707	N	Y	N	8	1686	61.03
THBS3	ENSG00000169231	1	155165379	155178842	N	Y	N	23	2871	55.29
MTX1	ENSG00000173171	1	155178490	155183614	N	N	N	8	1401	55.86
GBA	ENSG00000177628	1	155204239	155214653	Y	N	N	12	1611	51.64
FAM189B	ENSG00000160767	1	155216996	155225274	N	N	N	12	2007	57.4
SCAMP3	ENSG00000116521	1	155225770	155232221	N	N	N	9	1044	51.95
CLK2	ENSG00000176444	1	155232659	155248282	N	N	N	13	1500	50.41
HCN3	ENSG00000143630	1	155247374	155259639	N	N	N	8	2325	53.79
PKLR	ENSG00000143627	1	155259630	155271225	N	Y	N	11	1725	52.59
FDPS	ENSG00000160752	1	155278539	155290457	N	N	N	11	1260	50.48
RUSC1	ENSG00000160753	1	155290687	155300905	N	N	Y	10	2709	58.03
ASH1L	ENSG00000116539	1	155305059	155532598	N	N	N	28	8910	41.38
MSTO1	ENSG00000125459	1	155579979	155718153	N	N	N	14	1713	45.17
YY1AP1	ENSG00000163374	1	155629237	155658791	N	N	N	10	2667	44.64
DAP3	ENSG00000132676	1	155657751	155708803	Y	N	N	13	1197	44.89
GON4L	ENSG00000116580	1	155719508	155829191	N	Y	N	32	6726	44.03
SYT11	ENSG00000132718	1	155829300	155854990	N	Y	Y	4	1296	46.5
RIT1	ENSG00000143622	1	155867599	155881195	N	N	N	6	711	43.8
KIAA0907	ENSG00000132680	1	155882834	155904191	N	N	N	14	1845	42.57
RXFP4	ENSG00000173080	1	155911480	155912625	N	N	N	1	1125	62.13
ARHGEF2	ENSG00000116584	1	155916645	155966129	N	N	N	22	2964	51.71
SSR2	ENSG00000163479	1	155978839	155990750	N	N	N	6	552	46.99
UBQLN4	ENSG00000160803	1	156005092	156023585	N	N	N	11	1806	50.71
LAMTOR2	ENSG00000116586	1	156024543	156028301	Y	N	N	4	453	50.94
RAB25	ENSG00000132698	1	156030951	156040295	N	Y	N	5	642	51.24
MEX3A	ENSG00000254726	1	156046280	156051789	N	N	N	2	1563	57.06
LMNA	ENSG00000160789	1	156052364	156109880	N	Y	N	12	1995	53.04
SEMA4A	ENSG00000196189	1	156117157	156147543	N	Y	N	15	2286	51.59
SLC25A44	ENSG00000160785	1	156163880	156182587	N	N	Y	4	945	48.19
RP11-54H19.8	ENSG00000260238	1	156182773	156213123	N	N	N	7	663	50.18
PMF1	ENSG00000160783	1	156182784	156212874	N	N	N	7	663	50.08
BGLAP	ENSG00000242252	1	156211753	156213112	N	N	N	4	303	63.38
PAQR6	ENSG00000160781	1	156213206	156217881	N	N	Y	5	1092	61.1
SMG5	ENSG00000198952	1	156219015	156252616	N	N	N	22	3051	49.82
TMEM79	ENSG00000163472	1	156252726	156262976	N	N	N	4	1185	50.78
C1orf85	ENSG00000198715	1	156259880	156265463	N	N	N	6	1221	53.9
VHLL	ENSG00000189030	1	156268415	156269428	N	N	N	1	420	52.37
CCT3	ENSG00000163468	1	156278759	156337664	Y	N	N	14	1638	45.93
C1orf182	ENSG00000163467	1	156307105	156316786	N	N	N	4	378	46.44
RHBG	ENSG00000132677	1	156339003	156355011	N	Y	N	11	1374	51.83
C1orf61	ENSG00000125462	1	156374044	156400493	N	N	Y	5	566	51.53
MEF2D	ENSG00000116604	1	156433519	156470620	N	N	Y	12	1566	54.23
IQGAP3	ENSG00000183856	1	156495197	156542396	N	N	N	38	4896	50.86
TTC24	ENSG00000187862	1	156549519	156556562	N	N	N	10	1749	55.15
APOA1BP	ENSG00000163382	1	156561554	156564091	N	N	N	6	867	56.38
GPATCH4	ENSG00000160818	1	156564279	156571288	N	N	N	8	1128	48.64
HAPLN2	ENSG00000132702	1	156589086	156595517	N	Y	Y	7	1023	54.21
BCAN	ENSG00000132692	1	156611182	156629324	N	Y	Y	14	2736	55.82
NES	ENSG00000132688	1	156638555	156647189	Y	N	Y	4	4866	59
CRABP2	ENSG00000143320	1	156669398	156675608	N	Y	N	4	417	55.42
ISG20L2	ENSG00000143319	1	156691683	156698591	N	N	N	4	1062	50.3
RRNAD1	ENSG00000143303	1	156698234	156706752	N	N	N	8	1428	51
MRPL24	ENSG00000143314	1	156707095	156711382	N	N	N	6	651	48.93
HDGF	ENSG00000143321	1	156711899	156736717	N	Y	N	6	771	51.35
PRCC	ENSG00000143294	1	156720402	156770607	N	N	N	7	1476	46.54
SH2D2A	ENSG00000027869	1	156776035	156786654	N	Y	N	9	1200	55.56
NTRK1	ENSG00000198400	1	156785432	156851642	Y	N	N	17	2391	53.11
INSRR	ENSG00000027644	1	156809855	156828810	N	Y	N	22	3894	55.51
PEAR1	ENSG00000187800	1	156863490	156886226	N	N	N	23	3114	57.04
LRRC71	ENSG00000160838	1	156890442	156902886	N	N	N	15	1680	54.62
ARHGEF11	ENSG00000132694	1	156904632	157015162	N	N	N	41	4689	44.51
ETV3L	ENSG00000253831	1	157061836	157069600	N	N	N	5	1086	53.1
ETV3	ENSG00000117036	1	157090983	157108266	N	N	N	5	1539	43.29
FCRL5	ENSG00000143297	1	157483167	157522310	N	N	N	17	2934	42.97
FCRL4	ENSG00000163518	1	157543539	157567870	N	N	N	12	1548	42.08
FCRL3	ENSG00000160856	1	157646271	157670775	N	N	N	16	2229	40.32
FCRL2	ENSG00000132704	1	157715523	157746922	N	N	N	12	1527	40.89
FCRL1	ENSG00000163534	1	157764193	157789895	N	N	N	11	1290	41.02
CD5L	ENSG00000073754	1	157800704	157868046	N	Y	N	6	1044	39.69
KIRREL	ENSG00000183853	1	157963063	158070052	Y	N	N	15	2322	49.16
CD1D	ENSG00000158473	1	158149737	158154686	N	Y	N	7	1008	49.88
CD1A	ENSG00000158477	1	158223927	158228059	N	N	N	6	984	45.1
CD1C	ENSG00000158481	1	158259576	158263420	N	N	N	6	1002	43.64
CD1B	ENSG00000158485	1	158297741	158301321	N	N	N	6	1002	42.81
CD1E	ENSG00000158488	1	158323254	158327343	N	N	N	6	1167	44.62
OR10T2	ENSG00000186306	1	158368312	158369256	N	N	N	1	945	47.62
OR10K2	ENSG00000180708	1	158389718	158390656	N	N	N	1	939	46.33
OR10K1	ENSG00000173285	1	158435272	158436344	N	N	N	1	942	47.62
OR10R2	ENSG00000198965	1	158449668	158450675	N	N	N	1	1008	43.55
OR6Y1	ENSG00000197532	1	158516918	158517895	N	N	N	1	978	47.24
OR6P1	ENSG00000186440	1	158532441	158533394	N	N	N	1	954	49.37
OR10X1	ENSG00000186400	1	158548709	158549689	N	N	N	1	981	44.34
OR10Z1	ENSG00000198967	1	158576229	158577170	N	N	N	1	942	50.74
SPTA1	ENSG00000163554	1	158580278	158656488	Y	N	N	52	7260	37.53
OR6K2	ENSG00000196171	1	158669369	158670486	N	N	N	1	975	44.9
OR6K3	ENSG00000203757	1	158686958	158687953	N	N	N	1	996	44.38
OR6K6	ENSG00000180433	1	158724510	158725681	N	N	N	1	1032	45.65
OR6N1	ENSG00000197403	1	158735466	158736492	N	N	N	1	939	51.41
OR6N2	ENSG00000188340	1	158746472	158747425	N	N	N	1	954	44.86
MNDA	ENSG00000163563	1	158801107	158819296	N	N	N	7	1224	34.65
PYHIN1	ENSG00000163564	1	158900586	158946844	N	N	N	9	1479	38.93
IFI16	ENSG00000163565	1	158969758	159024945	N	N	N	12	2358	38.34
AIM2	ENSG00000163568	1	159032274	159116886	N	Y	N	6	1032	40.1
CADM3	ENSG00000162706	1	159141399	159173103	N	Y	Y	10	1299	46.2
DARC	ENSG00000213088	1	159173097	159176290	N	Y	Y	1	1017	54.48
FCER1A	ENSG00000179639	1	159259504	159278014	N	Y	N	6	774	38.03
OR10J3	ENSG00000196266	1	159283460	159284449	N	N	N	1	990	48.69
OR10J1	ENSG00000196184	1	159409512	159410600	N	N	N	1	963	46.56
OR10J5	ENSG00000184155	1	159504793	159505842	N	N	N	1	930	43.33
APCS	ENSG00000132703	1	159557615	159558655	N	Y	N	2	672	44.96
CRP	ENSG00000132693	1	159682079	159684379	N	Y	N	2	675	48.59
DUSP23	ENSG00000158716	1	159750722	159752333	N	N	N	2	453	59.37
FCRL6	ENSG00000181036	1	159770301	159786041	N	N	N	10	1305	47.58
SLAMF8	ENSG00000158714	1	159796540	159807039	N	N	N	5	858	49.75
C1orf204	ENSG00000188004	1	159804264	159825137	N	N	N	6	708	48.18
VSIG8	ENSG00000243284	1	159824106	159832447	N	N	N	7	1245	56.31
RP11-190A12.7	ENSG00000256029	1	159827690	159842843	N	N	N	3	186	52.67
CCDC19	ENSG00000213085	1	159842154	159869953	N	N	N	12	1656	46.23
TAGLN2	ENSG00000158710	1	159887897	159895522	N	N	N	5	663	56.56
IGSF9	ENSG00000085552	1	159896829	159915386	N	Y	N	21	3540	55.8
SLAMF9	ENSG00000162723	1	159921282	159924044	N	N	N	4	870	51.39
PIGM	ENSG00000143315	1	159997462	160001783	N	N	N	1	1272	41.3
KCNJ10	ENSG00000177807	1	160007257	160040038	Y	N	N	2	1140	48.34
KCNJ9	ENSG00000162728	1	160051360	160060353	N	Y	Y	3	1182	54.83
IGSF8	ENSG00000162729	1	160061130	160068733	N	N	N	7	1842	58.9
ATP1A2	ENSG00000018625	1	160085549	160113381	Y	N	Y	23	3063	50.38
ATP1A4	ENSG00000132681	1	160121360	160156767	N	Y	N	22	3090	45.77
CASQ1	ENSG00000143318	1	160160285	160171676	N	Y	N	11	1191	50.61
PEA15	ENSG00000162734	1	160175127	160185166	N	Y	Y	6	456	51.85
DCAF8	ENSG00000132716	1	160185505	160254920	N	N	N	18	2256	43.13
RP11-574F21.3	ENSG00000258465	1	160187254	160254920	N	N	N	18	2256	43.08
PEX19	ENSG00000162735	1	160246602	160256138	N	N	N	8	900	46.35
COPA	ENSG00000122218	1	160259063	160313190	N	N	N	33	3702	40.67
NCSTN	ENSG00000162736	1	160313062	160328742	Y	N	N	17	2130	46.85
NHLH1	ENSG00000171786	1	160336857	160342638	N	Y	N	2	402	50.12
VANGL2	ENSG00000162738	1	160370376	160398468	Y	N	N	8	1566	51.65
SLAMF6	ENSG00000162739	1	160454820	160493052	N	Y	N	8	999	39.67
CD84	ENSG00000066294	1	160510885	160549306	N	Y	N	8	1038	41.6
SLAMF1	ENSG00000117090	1	160577890	160617085	N	Y	N	7	1008	42.25
CD48	ENSG00000117091	1	160648536	160681641	N	Y	N	4	732	42.18
SLAMF7	ENSG00000026751	1	160709037	160724611	N	Y	N	7	1008	44.04
LY9	ENSG00000122224	1	160765896	160798045	N	Y	N	10	1971	44
CD244	ENSG00000122223	1	160799950	160832692	N	Y	N	9	1113	43.82
ITLN1	ENSG00000179914	1	160846329	160854960	N	N	N	8	942	47.49
ITLN2	ENSG00000158764	1	160914815	160924589	N	N	N	8	978	48.23
F11R	ENSG00000158769	1	160965001	161008784	Y	N	N	10	912	47.15
TSTD1	ENSG00000215845	1	161007421	161008780	N	N	N	4	369	60.15
USF1	ENSG00000158773	1	161009041	161015767	N	Y	N	11	933	50.71
ARHGAP30	ENSG00000186517	1	161016736	161039760	N	N	N	12	3306	49.52
PVRL4	ENSG00000143217	1	161040785	161059389	N	N	N	9	1533	52.53
KLHDC9	ENSG00000162755	1	161068151	161070136	N	N	N	4	1050	56.24
PFDN2	ENSG00000143256	1	161070346	161087901	Y	N	Y	4	465	44.14
NIT1	ENSG00000158793	1	161087876	161095235	N	Y	N	7	984	49.13
DEDD	ENSG00000158796	1	161090764	161102478	N	Y	N	5	1047	46.36
UFC1	ENSG00000143222	1	161122566	161128646	N	N	N	6	504	46.11
USP21	ENSG00000143258	1	161129240	161135513	N	N	N	14	1698	53.43
PPOX	ENSG00000143224	1	161136200	161147803	N	N	N	13	1434	53.01
B4GALT3	ENSG00000158850	1	161141100	161147287	N	N	N	8	1182	51.54
ADAMTS4	ENSG00000158859	1	161159538	161168846	N	Y	N	9	2514	54.62
NDUFS2	ENSG00000158864	1	161166894	161184185	N	N	N	15	1392	49.73
FCER1G	ENSG00000158869	1	161185024	161190489	N	Y	N	5	339	49.29
APOA2	ENSG00000158874	1	161192082	161193421	N	Y	N	4	303	53.51
TOMM40L	ENSG00000158882	1	161195793	161200408	N	N	N	10	927	52.92
NR1I3	ENSG00000143257	1	161199456	161208092	N	Y	N	8	1074	48.84
PCP4L1	ENSG00000248485	1	161228517	161255240	N	N	N	3	207	45.82
MPZ	ENSG00000158887	1	161274525	161279762	N	Y	Y	6	777	50.52
SDHC	ENSG00000143252	1	161284047	161332984	N	N	N	6	510	42.37
C1orf192	ENSG00000188931	1	161334521	161337664	N	N	N	5	534	42.27
FCGR2A	ENSG00000143226	1	161475220	161493803	N	Y	N	7	954	43.82
HSPA6	ENSG00000173110	1	161494036	161496681	N	N	N	1	1932	59.83
FCGR3A	ENSG00000203747	1	161511549	161600917	N	N	N	5	873	44.3
FCGR2B	ENSG00000072694	1	161551101	161648444	N	Y	N	8	933	44.75
FCGR3B	ENSG00000162747	1	161592986	161601753	N	N	N	5	810	44.5
FCRLA	ENSG00000132185	1	161676762	161684142	N	Y	N	6	1149	46.05
FCRLB	ENSG00000162746	1	161691353	161697933	N	Y	N	8	1281	53.88
DUSP12	ENSG00000081721	1	161719548	161727028	N	N	N	6	1023	39.87
ATF6	ENSG00000118217	1	161736084	161933860	N	Y	N	16	2013	37.21
OLFML2B	ENSG00000162745	1	161952982	161993644	N	N	N	8	2256	48.22
NOS1AP	ENSG00000198929	1	162039564	162353321	N	N	N	10	1521	42.72
RP11-565P22.6	ENSG00000254706	1	162335197	162351905	N	N	N	3	541	49.3
C1orf226	ENSG00000239887	1	162336698	162356600	N	N	N	3	948	50.44
C1orf111	ENSG00000171722	1	162343515	162346660	N	N	N	3	786	51.97
SH2D1B	ENSG00000198574	1	162365056	162381928	N	Y	N	4	399	41.4
UHMK1	ENSG00000152332	1	162467041	162499419	N	Y	N	8	1260	38.32
UAP1	ENSG00000117143	1	162531321	162569627	N	N	N	11	1569	39.65
DDR2	ENSG00000162733	1	162601163	162750237	N	Y	N	19	2568	40.59
HSD17B7	ENSG00000132196	1	162760492	162782607	Y	N	N	9	1026	39.34
C1orf110	ENSG00000185860	1	162794248	162838605	N	N	N	4	909	39.71
RGS4	ENSG00000117152	1	163038565	163046592	Y	N	Y	6	909	39.47
RGS5	ENSG00000143248	1	163080911	163187426	N	Y	Y	6	606	37.33
NUF2	ENSG00000143228	1	163236366	163325554	N	N	N	14	1395	36.44
PBX1	ENSG00000185630	1	164524821	164868533	Y	N	Y	9	1293	41.67
LMX1A	ENSG00000162761	1	165171104	165325952	Y	N	N	8	1149	43.25
RXRG	ENSG00000143171	1	165370159	165414433	N	Y	N	10	1392	44.03
LRRC52	ENSG00000162763	1	165513244	165533198	N	N	N	2	942	44.07
MGST3	ENSG00000143198	1	165600098	165631033	N	N	Y	7	501	43.51
ALDH9A1	ENSG00000143149	1	165631453	165668100	N	N	N	11	1557	40.34
TMCO1	ENSG00000143183	1	165693530	165796992	N	N	N	7	720	39.88
UCK2	ENSG00000143179	1	165796768	165880855	N	N	N	7	786	44.22
FAM78B	ENSG00000188859	1	166026674	166136206	N	N	N	3	786	45.09
POGK	ENSG00000143157	1	166808681	166825581	N	N	N	5	1830	47.02
TADA1	ENSG00000152382	1	166825747	166845564	N	N	N	8	1008	40.95
ILDR2	ENSG00000143195	1	166887996	166944719	N	Y	N	10	1920	42.9
MAEL	ENSG00000143194	1	166958346	166991451	N	Y	N	12	1305	36.94
GPA33	ENSG00000143167	1	167022073	167059868	N	N	N	7	960	47.54
DUSP27	ENSG00000198842	1	167063282	167098402	N	N	N	6	3477	44.81
POU2F1	ENSG00000143190	1	167190066	167396582	Y	N	N	16	2301	37.96
CD247	ENSG00000198821	1	167399877	167487847	Y	N	N	8	495	47.24
CREG1	ENSG00000143162	1	167498914	167523004	N	N	N	4	663	44.46
RCSD1	ENSG00000198771	1	167599330	167675486	N	N	N	7	1251	46.77
MPZL1	ENSG00000197965	1	167690429	167761156	N	N	N	6	810	41.24
ADCY10	ENSG00000143199	1	167778625	167883453	N	Y	N	33	4833	41.76
BRP44	ENSG00000143158	1	167885967	167906278	N	N	N	6	384	37.86
DCAF6	ENSG00000143164	1	167905021	168045081	N	N	N	22	2856	35.91
AL033532.1	ENSG00000235471	1	168048781	168054469	N	N	N	2	423	46.37
GPR161	ENSG00000143147	1	168053997	168106821	N	Y	Y	7	1650	46.93
TIPRL	ENSG00000143155	1	168148171	168169950	N	N	N	7	819	39.04
SFT2D2	ENSG00000213064	1	168195176	168212378	N	N	N	8	483	44.78
ANKRD36BP1	ENSG00000214262	1	168214803	168216581	N	N	N	1	360	36.14
TBX19	ENSG00000143178	1	168250278	168283664	N	Y	N	8	1347	42.83
XCL2	ENSG00000143185	1	168510003	168513235	N	N	N	3	345	42.16
XCL1	ENSG00000143184	1	168545711	168551315	N	Y	N	3	345	39.98
DPT	ENSG00000143196	1	168664697	168698502	N	Y	N	4	606	42.2
ATP1B1	ENSG00000143153	1	169074935	169101960	N	Y	Y	7	912	43.48
NME7	ENSG00000143156	1	169101769	169337205	N	Y	N	12	1131	36.61
BLZF1	ENSG00000117475	1	169337208	169365778	N	N	N	8	1203	35.78
C1orf114	ENSG00000117477	1	169364108	169429907	N	N	N	6	1530	36.8
SLC19A2	ENSG00000117479	1	169433147	169455241	N	Y	N	6	1494	38.72
F5	ENSG00000198734	1	169483404	169555826	Y	N	N	25	6690	38.1
SELP	ENSG00000174175	1	169558037	169599380	N	Y	N	17	2493	40.48
C1orf112	ENSG00000000460	1	169631245	169823221	N	N	N	25	2562	39.22
SELL	ENSG00000188404	1	169659808	169680839	N	Y	N	9	1158	38.85
SELE	ENSG00000007908	1	169691781	169703220	N	Y	N	14	1833	39.01
METTL18	ENSG00000171806	1	169761670	169764107	N	N	N	2	1119	40.77
SCYL3	ENSG00000000457	1	169821804	169863408	N	N	N	14	2229	40.34
KIFAP3	ENSG00000075945	1	169890467	170054349	Y	N	Y	20	2379	34.27
METTL11B	ENSG00000203740	1	170115142	170136931	N	N	N	4	852	38.04
GORAB	ENSG00000120370	1	170501270	170522974	N	N	N	5	1185	36.31
PRRX1	ENSG00000116132	1	170631869	170708560	Y	N	N	4	738	39.17
C1orf129	ENSG00000117501	1	170904612	171033906	N	N	N	22	2586	37.59
FMO3	ENSG00000007933	1	171060018	171086959	N	N	N	9	1599	36.5
FMO6P	ENSG00000117507	1	171106879	171130707	N	N	N	8	1620	38.94
FMO2	ENSG00000094963	1	171154347	171181822	N	N	N	9	1416	38.87
FMO1	ENSG00000010932	1	171217638	171255117	N	N	N	9	1599	40.92
FMO4	ENSG00000076258	1	171283347	171311223	N	N	N	10	1677	40.13
PRRC2C	ENSG00000117523	1	171454651	171562650	N	N	N	35	8697	38.3
MYOC	ENSG00000034971	1	171604557	171621811	N	Y	N	3	1515	45.7
VAMP4	ENSG00000117533	1	171669300	171711387	N	N	N	8	426	36.68
METTL13	ENSG00000010165	1	171750788	171783163	N	N	N	8	2100	43.62
DNM3	ENSG00000197959	1	171810621	172387606	N	Y	Y	21	2610	37.28
PIGC	ENSG00000135845	1	172339329	172413230	N	N	N	1	894	38.22
C1orf105	ENSG00000180999	1	172389828	172437971	N	N	N	7	552	41.63
C1orf9	ENSG00000094975	1	172501489	172580971	N	N	N	23	4221	36.42
FASLG	ENSG00000117560	1	172628154	172636014	N	Y	N	4	846	41.71
TNFSF18	ENSG00000120337	1	173009100	173020103	N	N	N	3	600	36.87
TNFSF4	ENSG00000117586	1	173152873	173176452	N	Y	N	3	552	39.89
PRDX6	ENSG00000117592	1	173446405	173457946	N	Y	N	5	675	40.72
SLC9C2	ENSG00000162753	1	173469603	173572233	N	N	N	28	3375	38.59
ANKRD45	ENSG00000183831	1	173578700	173639001	N	N	N	6	801	39.48
BX248409.1	ENSG00000228394	1	173626484	173644582	N	N	N	5	264	39.6
KLHL20	ENSG00000076321	1	173684080	173755840	N	Y	N	12	1830	38.32
CENPL	ENSG00000120334	1	173768688	173793858	N	N	N	7	1173	40.71
DARS2	ENSG00000117593	1	173793641	173827684	N	N	N	17	1938	40.56
ZBTB37	ENSG00000185278	1	173837220	173866494	N	N	N	5	1512	40.55
SERPINC1	ENSG00000117601	1	173872947	173886516	Y	N	N	7	1395	46.32
RC3H1	ENSG00000135870	1	173900352	173991435	N	Y	N	19	3402	38.58
RABGAP1L	ENSG00000152061	1	174128548	174964445	N	Y	Y	21	2448	37.91
GPR52	ENSG00000203737	1	174417212	174418683	N	N	N	1	1086	42.05
CACYBP	ENSG00000116161	1	174968300	174980851	N	Y	Y	6	687	40.3
MRPS14	ENSG00000120333	1	174979925	174992561	N	N	N	3	387	40.16
TNN	ENSG00000120332	1	175036994	175117202	N	N	N	19	3900	45.69
Z99715.1	ENSG00000265365	1	175126123	175135877	N	N	N	2	462	45.56
KIAA0040	ENSG00000235750	1	175126123	175162135	N	N	N	3	300	44.88
TNR	ENSG00000116147	1	175291935	175712906	N	Y	N	24	4077	43.87
RFWD2	ENSG00000143207	1	175913967	176176629	N	N	N	20	2196	36.32
PAPPA2	ENSG00000116183	1	176432307	176814735	N	Y	N	23	5376	39.35
ASTN1	ENSG00000152092	1	176826438	177134109	N	Y	Y	23	3909	41.64
FAM5B	ENSG00000198797	1	177140633	177251558	N	N	Y	8	2352	41.76
SEC16B	ENSG00000120341	1	177896701	177939348	N	N	N	26	3183	44.75
RASAL2	ENSG00000075391	1	178062864	178448644	N	N	N	18	3843	36.99
C1orf49	ENSG00000240021	1	178482212	178517734	N	N	N	9	702	48.38
C1orf220	ENSG00000213057	1	178511887	178518024	N	N	N	3	321	49.25
AL513013.1	ENSG00000184909	1	178511950	178517579	N	N	N	3	405	49.91
RALGPS2	ENSG00000116191	1	178694300	178889238	N	N	N	20	1752	36.84
ANGPTL1	ENSG00000116194	1	178818840	178840187	N	Y	N	6	1476	33.73
FAM20B	ENSG00000116199	1	178994939	179045697	N	N	N	8	1230	43.17
TOR3A	ENSG00000186283	1	179050512	179067158	N	N	N	6	1194	52.61
ABL2	ENSG00000143322	1	179068462	179198819	N	Y	N	12	3549	41.31
SOAT1	ENSG00000057252	1	179262925	179327815	N	Y	N	16	1653	39.59
AXDND1	ENSG00000162779	1	179334855	179523870	N	N	N	26	3039	39.37
NPHS2	ENSG00000116218	1	179519674	179545087	Y	N	N	8	1152	41.64
TDRD5	ENSG00000162782	1	179560748	179660407	N	Y	N	18	3108	36.77
FAM163A	ENSG00000143340	1	179712298	179785333	N	N	N	5	504	47.32
TOR1AIP2	ENSG00000169905	1	179809102	179846934	N	N	N	6	1413	38.85
AL359853.2	ENSG00000258664	1	179833916	179834311	N	N	N	1	396	40.91
TOR1AIP1	ENSG00000143337	1	179851177	179888412	Y	N	N	11	1800	38.98
CEP350	ENSG00000135837	1	179923873	180084015	N	N	Y	38	9354	36.47
QSOX1	ENSG00000116260	1	180123969	180173165	N	N	N	12	2244	51.87
LHX4	ENSG00000121454	1	180199421	180249380	Y	N	N	6	1173	51.15
ACBD6	ENSG00000135847	1	180244515	180472089	N	N	N	8	849	37.34
XPR1	ENSG00000143324	1	180601140	180859387	N	Y	N	15	2091	36.95
KIAA1614	ENSG00000135835	1	180882290	180920750	N	N	N	9	3573	54.17
AL162431.1	ENSG00000234237	1	180941695	180949868	N	N	N	2	168	41.46
STX6	ENSG00000135823	1	180941861	180992047	N	N	Y	8	768	40.62
MR1	ENSG00000153029	1	181003067	181031074	N	Y	N	6	1026	46.15
IER5	ENSG00000162783	1	181057638	181059977	N	N	N	1	984	62.14
CACNA1E	ENSG00000198216	1	181382238	181777219	N	Y	N	48	6942	43.7
ZNF648	ENSG00000179930	1	182023705	182030847	N	N	N	2	1707	51.55
GLUL	ENSG00000135821	1	182350839	182361341	Y	N	N	8	1122	47.77
TEDDM1	ENSG00000203730	1	182367252	182369751	N	N	N	1	822	45.48
RGSL1	ENSG00000121446	1	182419256	182529734	N	N	N	22	3231	40.26
RNASEL	ENSG00000135828	1	182542769	182558391	N	Y	N	7	2226	41.52
RGS16	ENSG00000143333	1	182567758	182573543	N	Y	Y	5	609	50.88
RGS8	ENSG00000135824	1	182615239	182653711	N	N	N	6	597	44.16
NPL	ENSG00000135838	1	182758428	182799519	N	Y	N	12	963	41.95
DHX9	ENSG00000135829	1	182808504	182856886	Y	N	N	28	3813	38.24
SHCBP1L	ENSG00000157060	1	182869000	182922660	N	N	N	10	1962	38.47
LAMC1	ENSG00000135862	1	182992597	183114727	Y	N	N	28	4830	40.08
LAMC2	ENSG00000058085	1	183155373	183214035	Y	N	N	23	3582	43.28
NMNAT2	ENSG00000157064	1	183217372	183387737	N	N	Y	11	924	44.41
SMG7	ENSG00000116698	1	183441351	183567381	N	N	N	23	3537	40.28
NCF2	ENSG00000116701	1	183524698	183560011	N	N	N	15	1581	46.59
ARPC5	ENSG00000162704	1	183592401	183604892	N	N	N	4	465	38.73
RGL1	ENSG00000143344	1	183605208	183897666	N	N	N	19	2412	39.98
APOBEC4	ENSG00000173627	1	183615541	183622451	N	N	N	2	1104	38.78
GLT25D2	ENSG00000198756	1	183898796	184006863	N	N	Y	12	1881	40.45
TSEN15	ENSG00000198860	1	184020811	184043346	N	N	N	5	516	35.04
C1orf21	ENSG00000116667	1	184356192	184598154	N	N	Y	6	366	40.26
EDEM3	ENSG00000116406	1	184659637	184724047	N	N	N	20	2799	34.4
FAM129A	ENSG00000135842	1	184759858	184943682	N	Y	N	14	2787	40.12
RNF2	ENSG00000121481	1	185014496	185071740	Y	N	N	7	1011	39.39
TRMT1L	ENSG00000121486	1	185087220	185126204	N	Y	N	15	2202	35.55
SWT1	ENSG00000116668	1	185126212	185260897	N	N	N	19	2703	37.64
IVNS1ABP	ENSG00000116679	1	185265520	185286461	Y	N	N	15	1929	37.35
HMCN1	ENSG00000143341	1	185703683	186160085	N	N	N	107	16908	35.97
PRG4	ENSG00000116690	1	186265405	186283694	N	Y	N	13	4215	38.06
TPR	ENSG00000047410	1	186282954	186344825	N	N	N	51	7092	34.22
C1orf27	ENSG00000157181	1	186344890	186390510	N	N	N	14	1365	35.21
OCLM	ENSG00000262180	1	186369704	186370587	N	N	N	1	135	35.52
PDC	ENSG00000116703	1	186412698	186430254	N	Y	N	3	741	35.3
PTGS2	ENSG00000073756	1	186640923	186649559	Y	N	N	10	1815	34.87
PLA2G4A	ENSG00000116711	1	186798085	186958113	N	Y	N	18	2250	36.1
FAM5C	ENSG00000162670	1	190066792	190446759	N	N	Y	8	2301	33.22
RGS18	ENSG00000150681	1	192127587	192154945	N	N	N	5	708	33.96
RGS21	ENSG00000253148	1	192286122	192336415	N	N	N	5	459	32.78
RGS1	ENSG00000090104	1	192544857	192549161	N	Y	Y	5	630	33.89
RGS13	ENSG00000127074	1	192605275	192629390	N	Y	N	6	480	35.75
RGS2	ENSG00000116741	1	192778169	192781403	N	Y	N	5	636	40.83
UCHL5	ENSG00000116750	1	192984889	193029237	Y	N	N	12	1107	35.21
TROVE2	ENSG00000116747	1	193028552	193060907	N	Y	Y	9	1617	35.99
GLRX2	ENSG00000023572	1	193065598	193075244	N	N	N	4	498	41.92
CDC73	ENSG00000134371	1	193091147	193223031	Y	N	N	17	1596	35.71
B3GALT2	ENSG00000162630	1	193148175	193155784	N	Y	Y	2	1269	32.61
KCNT2	ENSG00000162687	1	196194909	196577541	N	N	N	28	3408	33.8
CFH	ENSG00000000971	1	196621008	196716634	N	Y	Y	22	3696	35.2
CFHR3	ENSG00000116785	1	196743925	196763203	N	N	N	6	993	35.61
CFHR1	ENSG00000244414	1	196788875	196801319	N	N	N	6	993	33.72
CFHR2	ENSG00000080910	1	196788898	196928356	N	N	N	5	813	35.89
CFHR4	ENSG00000134365	1	196857144	196887843	N	N	N	10	1734	34.14
CFHR5	ENSG00000134389	1	196946667	196978804	N	N	N	10	1782	34.88
F13B	ENSG00000143278	1	197008321	197036397	N	N	N	12	1986	34.07
ASPM	ENSG00000066279	1	197053258	197115824	N	Y	N	28	10434	34.66
ZBTB41	ENSG00000177888	1	197127572	197169672	N	N	N	10	2730	33.75
CRB1	ENSG00000134376	1	197170592	197447585	Y	N	N	12	4221	36.51
DENND1B	ENSG00000213047	1	197473878	197744826	N	N	N	16	1281	34.32
C1orf53	ENSG00000203724	1	197871777	197876497	N	N	N	3	438	40.35
LHX9	ENSG00000143355	1	197881618	197904608	N	Y	N	5	1194	42.73
NEK7	ENSG00000151414	1	198126093	198291550	Y	N	N	10	909	35.84
ATP6V1G3	ENSG00000151418	1	198492352	198510075	N	N	N	4	375	35.29
PTPRC	ENSG00000081237	1	198607801	198726545	Y	N	N	33	3921	34.25
NR5A2	ENSG00000116833	1	199996730	200146552	Y	N	N	8	1626	40.7
C1orf98	ENSG00000203721	1	200311672	200343482	N	N	N	5	276	42.83
ZNF281	ENSG00000162702	1	200375827	200379184	N	N	N	2	2688	47.68
KIF14	ENSG00000118193	1	200520628	200589862	N	N	N	30	4947	37.83
DDX59	ENSG00000118197	1	200593024	200639097	N	N	N	8	1860	42
CAMSAP2	ENSG00000118200	1	200708686	200829832	N	N	Y	18	4470	37.69
GPR25	ENSG00000170128	1	200842083	200843306	N	N	N	1	1086	72.71
C1orf106	ENSG00000163362	1	200860176	200884863	N	N	N	10	1992	53.22
KIF21B	ENSG00000116852	1	200938520	200992828	N	N	Y	35	4914	55
CACNA1S	ENSG00000081248	1	201008642	201081694	Y	N	N	44	5622	51.6
TMEM9	ENSG00000116857	1	201103900	201140702	N	N	N	6	561	48.53
IGFN1	ENSG00000163395	1	201159953	201198080	N	N	N	24	11127	52.47
PKP1	ENSG00000081277	1	201252580	201302121	N	N	N	14	2244	52.24
TNNT2	ENSG00000118194	1	201328136	201346890	Y	N	N	16	894	54.6
LAD1	ENSG00000159166	1	201342372	201368736	N	N	N	10	1596	54.48
TNNI1	ENSG00000159173	1	201373625	201398994	N	N	N	8	564	52.94
PHLDA3	ENSG00000174307	1	201434620	201438365	N	N	N	2	384	60.3
CSRP1	ENSG00000159176	1	201452658	201478584	N	Y	Y	6	582	50.68
NAV1	ENSG00000134369	1	201592411	201796102	N	N	Y	30	5634	47.41
IPO9	ENSG00000198700	1	201798269	201853422	Y	N	Y	24	3126	41.91
SHISA4	ENSG00000198892	1	201857808	201861434	N	Y	Y	5	594	58.4
LMOD1	ENSG00000163431	1	201865580	201915715	N	N	N	3	1803	48.52
TIMM17A	ENSG00000134375	1	201924619	201939789	N	N	Y	6	516	42.32
RNPEP	ENSG00000176393	1	201951500	201975275	N	N	N	11	1953	48.75
ELF3	ENSG00000163435	1	201977073	201986316	Y	N	N	8	1116	54.78
GPR37L1	ENSG00000170075	1	202091986	202098640	N	Y	N	2	1446	54.71
ARL8A	ENSG00000143862	1	202102532	202113869	N	N	Y	7	561	53.34
PTPN7	ENSG00000143851	1	202116141	202130716	N	Y	N	10	1398	52.92
LGR6	ENSG00000133067	1	202163029	202288909	N	Y	N	18	2904	49.61
UBE2T	ENSG00000077152	1	202300785	202311108	N	N	N	7	594	40.71
PPP1R12B	ENSG00000077157	1	202317827	202557697	N	N	N	24	2949	39.4
SYT2	ENSG00000143858	1	202559724	202679545	Y	N	Y	9	1260	50.15
KDM5B	ENSG00000117139	1	202696526	202778598	N	N	N	28	4743	41.13
RP11-480I12.4	ENSG00000184774	1	202789394	202796353	N	N	N	3	618	47.67
RABIF	ENSG00000183155	1	202848085	202858263	N	N	N	2	372	45.67
KLHL12	ENSG00000117153	1	202860228	202897764	N	N	N	12	1821	41.92
ADIPOR1	ENSG00000159346	1	202909951	202927700	N	Y	N	9	1128	44.28
CYB5R1	ENSG00000159348	1	202930997	202936408	N	N	N	9	918	50.33
TMEM183A	ENSG00000163444	1	202976514	202993976	N	N	Y	8	1131	41.5
PPFIA4	ENSG00000143847	1	202995626	203047864	N	N	Y	29	3561	52.66
MYOG	ENSG00000122180	1	203052260	203055164	Y	N	Y	3	675	58.07
ADORA1	ENSG00000163485	1	203059782	203136533	N	Y	Y	6	981	48.14
MYBPH	ENSG00000133055	1	203136939	203144941	N	N	N	11	1434	57.62
CHI3L1	ENSG00000133048	1	203148059	203155877	N	Y	Y	10	1152	54.78
CHIT1	ENSG00000133063	1	203181955	203242769	N	N	N	11	1401	45.2
BTG2	ENSG00000159388	1	203274619	203278730	N	Y	N	3	477	53.33
FMOD	ENSG00000122176	1	203309753	203320617	N	Y	N	3	1131	50.16
PRELP	ENSG00000188783	1	203444956	203460480	N	N	Y	3	1149	50
OPTC	ENSG00000188770	1	203463271	203477992	N	N	N	8	999	51.14
ATP2B4	ENSG00000058668	1	203595689	203713209	N	Y	Y	21	3618	46.5
LAX1	ENSG00000122188	1	203734304	203745361	N	Y	N	5	1197	46.18
ZC3H11A	ENSG00000058673	1	203764782	203823252	N	N	N	20	2433	40.85
ZBED6	ENSG00000257315	1	203765437	203769686	N	N	N	1	2940	41.18
SNRPE	ENSG00000182004	1	203830731	203839678	N	N	N	5	279	42.59
SOX13	ENSG00000143842	1	204042243	204096863	N	Y	N	14	1869	51.76
ETNK2	ENSG00000143845	1	204100190	204121307	N	Y	N	8	1185	52.76
REN	ENSG00000143839	1	204123944	204135465	Y	N	N	10	1221	51.87
KISS1	ENSG00000170498	1	204159469	204165614	N	Y	N	3	417	51.69
GOLT1A	ENSG00000174567	1	204167288	204183220	N	N	N	5	399	47.52
PLEKHA6	ENSG00000143850	1	204190349	204346793	N	N	N	23	3207	48.95
PPP1R15B	ENSG00000158615	1	204372515	204380919	Y	N	N	2	2142	40.43
PIK3C2B	ENSG00000133056	1	204391756	204463852	N	N	N	34	4905	49.35
MDM4	ENSG00000198625	1	204485511	204542871	Y	N	N	11	1473	43.49
LRRN2	ENSG00000170382	1	204586298	204654861	N	N	N	1	2142	50.12
NFASC	ENSG00000163531	1	204797779	204991950	Y	N	Y	32	4044	47.92
CNTN2	ENSG00000184144	1	205012325	205047627	N	Y	N	23	3123	54.05
TMEM81	ENSG00000174529	1	205052258	205053645	N	N	N	1	768	47.19
RBBP5	ENSG00000117222	1	205055270	205091143	N	N	N	14	1617	40.77
DSTYK	ENSG00000133059	1	205111632	205180727	N	N	N	13	2790	43.57
TMCC2	ENSG00000133069	1	205197304	205242471	N	N	Y	5	2130	51.21
NUAK2	ENSG00000163545	1	205271187	205290883	Y	N	N	7	1887	51.29
KLHDC8A	ENSG00000162873	1	205305220	205326166	N	N	N	9	1053	50.87
LEMD1	ENSG00000186007	1	205350506	205425082	N	N	N	6	546	46.82
CDK18	ENSG00000117266	1	205473723	205501921	N	N	N	16	1515	55.7
MFSD4	ENSG00000174514	1	205538013	205572046	N	N	N	10	1545	50.98
ELK4	ENSG00000158711	1	205577071	205601090	N	Y	N	5	1296	40.65
SLC45A3	ENSG00000158715	1	205626979	205649587	N	N	N	5	1662	54.41
NUCKS1	ENSG00000069275	1	205681947	205719404	N	N	N	7	732	39.57
RAB7L1	ENSG00000117280	1	205737114	205744588	N	N	N	6	612	45.95
SLC41A1	ENSG00000133065	1	205758221	205782876	N	N	N	11	1542	50.84
PM20D1	ENSG00000162877	1	205797150	205819260	N	N	N	13	1509	46.64
SLC26A9	ENSG00000174502	1	205882176	205912588	N	Y	N	21	2664	52.02
FAM72A	ENSG00000196550	1	206136916	206155151	N	N	N	4	450	42.13
AVPR1B	ENSG00000198049	1	206223976	206231639	N	Y	N	2	1275	51.59
C1orf186	ENSG00000196533	1	206238872	206288647	N	N	N	6	519	44.25
CTSE	ENSG00000196188	1	206317459	206332104	N	Y	N	9	1206	43.75
SRGAP2	ENSG00000163486	1	206516198	206637783	N	N	Y	20	2956	43.28
IKBKE	ENSG00000143466	1	206643791	206670223	N	Y	N	22	2151	53.36
C1orf147	ENSG00000162888	1	206664449	206671061	N	N	N	2	813	52.91
RASSF5	ENSG00000136653	1	206680879	206762616	N	Y	N	6	1257	48.2
EIF2D	ENSG00000143486	1	206744620	206785904	N	N	N	15	1755	46.23
DYRK3	ENSG00000143479	1	206808881	206857764	N	Y	N	3	1767	44.46
MAPKAPK2	ENSG00000162889	1	206858289	206907628	N	Y	N	10	1203	48.7
IL10	ENSG00000136634	1	206940947	206945839	N	Y	N	5	537	47.76
IL19	ENSG00000142224	1	206972215	207016324	N	N	N	6	648	43.87
IL20	ENSG00000162891	1	207038699	207042568	N	N	N	6	531	43.7
IL24	ENSG00000162892	1	207070788	207077484	N	N	N	7	624	48.47
FAIM3	ENSG00000162894	1	207077731	207096592	N	Y	N	8	1173	48.63
PIGR	ENSG00000162896	1	207101863	207119811	N	Y	N	11	2295	49.28
FCAMR	ENSG00000162897	1	207131310	207143970	N	Y	N	8	1734	48.99
C1orf116	ENSG00000182795	1	207191866	207206101	N	N	N	4	1806	47.46
YOD1	ENSG00000180667	1	207217194	207226325	N	N	N	2	1047	39.45
PFKFB2	ENSG00000123836	1	207222801	207254369	N	N	N	15	1518	44.86
C4BPB	ENSG00000123843	1	207262187	207273338	N	N	N	7	759	40.01
C4BPA	ENSG00000123838	1	207277607	207318317	N	N	N	12	1794	39.21
CD55	ENSG00000196352	1	207494853	207534311	N	Y	N	10	1335	36.33
CR2	ENSG00000117322	1	207627575	207663240	N	Y	N	20	3279	39.17
CR1	ENSG00000203710	1	207669492	207813992	N	N	N	47	7470	39.21
CR1L	ENSG00000197721	1	207818458	207911761	N	N	N	12	1710	40.5
CD46	ENSG00000117335	1	207925402	207968858	N	Y	N	13	1200	38.21
C1orf132	ENSG00000203709	1	207986905	208042495	N	N	N	4	437	47.71
CD34	ENSG00000174059	1	208057594	208084747	N	Y	N	8	1158	46.06
PLXNA2	ENSG00000076356	1	208195587	208417665	N	Y	Y	32	5685	47.98
CAMK1G	ENSG00000008118	1	209757062	209787283	N	Y	Y	13	1431	47.01
LAMB3	ENSG00000196878	1	209788220	209825811	Y	N	N	23	3519	49.95
G0S2	ENSG00000123689	1	209848765	209849733	N	N	N	2	312	57.59
HSD11B1	ENSG00000117594	1	209859510	209908295	N	Y	N	7	879	40.88
TRAF3IP3	ENSG00000009790	1	209929377	209955668	N	N	N	17	1656	45.61
C1orf74	ENSG00000162757	1	209955661	209957904	N	N	N	2	810	48.53
IRF6	ENSG00000117595	1	209959036	209979465	Y	N	N	9	1404	44.9
DIEXF	ENSG00000117597	1	210001352	210025558	N	N	N	12	2271	40.9
SYT14	ENSG00000143469	1	210111538	210337636	N	N	N	10	1860	36.57
C1orf133	ENSG00000203706	1	210404801	210407392	N	N	N	2	303	58.06
SERTAD4	ENSG00000082497	1	210406144	210419976	N	N	N	4	1071	43.15
HHAT	ENSG00000054392	1	210501596	210849638	Y	N	N	12	1557	42.26
KCNH1	ENSG00000143473	1	210856555	211307457	N	N	N	11	2970	41
RCOR3	ENSG00000117625	1	211431719	211489727	N	N	N	12	1662	37.38
TRAF5	ENSG00000082512	1	211499957	211548288	N	Y	N	11	1674	44.65
RD3	ENSG00000198570	1	211649864	211666259	N	Y	N	3	588	51.2
SLC30A1	ENSG00000170385	1	211744910	211752084	Y	N	N	2	1524	38.51
NEK2	ENSG00000117650	1	211836114	211848960	N	N	N	8	1338	38.68
LPGAT1	ENSG00000123684	1	211916799	212004114	N	N	N	8	1113	38.3
INTS7	ENSG00000143493	1	212113741	212208884	N	N	N	20	2889	38.12
DTL	ENSG00000143476	1	212208919	212280742	Y	N	N	15	2193	38.43
PPP2R5A	ENSG00000066027	1	212458782	212535200	N	N	N	13	1461	39.32
TMEM206	ENSG00000065600	1	212537273	212588243	N	N	N	9	1236	44.57
NENF	ENSG00000117691	1	212606229	212619714	N	N	N	4	519	47.73
ATF3	ENSG00000162772	1	212738676	212794119	N	Y	N	4	546	43.16
FAM71A	ENSG00000162771	1	212797789	212800120	N	N	N	1	1785	55.4
BATF3	ENSG00000123685	1	212859760	212873327	N	Y	N	3	384	49.13
NSL1	ENSG00000117697	1	212899495	212965124	N	N	N	6	846	39.75
TATDN3	ENSG00000203705	1	212965170	212989968	N	N	N	10	846	40.66
C1orf227	ENSG00000185523	1	213003483	213020991	N	N	N	3	297	43.95
FLVCR1	ENSG00000162769	1	213031597	213072705	Y	N	N	10	1668	40.27
VASH2	ENSG00000143494	1	213123862	213165379	N	Y	N	7	1068	48.23
ANGEL2	ENSG00000174606	1	213165524	213189168	N	N	Y	9	1635	38.68
RPS6KC1	ENSG00000136643	1	213224589	213448116	N	N	N	15	3201	37.51
PROX1	ENSG00000117707	1	214156524	214214853	Y	N	N	5	2214	41.17
SMYD2	ENSG00000143499	1	214454445	214510474	N	N	N	12	1302	43.58
PTPN14	ENSG00000152104	1	214530851	214725792	N	Y	N	19	3564	41.26
CENPF	ENSG00000117724	1	214776538	214837931	N	N	N	20	9345	40.92
KCNK2	ENSG00000082482	1	215179118	215410436	N	Y	N	7	1281	36.37
KCTD3	ENSG00000136636	1	215740735	215795073	N	N	N	18	2448	36.06
USH2A	ENSG00000042781	1	215796236	216596738	N	Y	N	73	15681	36.36
ESRRG	ENSG00000196482	1	216676588	217311097	Y	N	N	8	1413	38.06
GPATCH2	ENSG00000092978	1	217600334	217804424	N	N	N	10	1587	36.36
SPATA17	ENSG00000162814	1	217804666	218045038	N	N	N	11	1086	35.7
RRP15	ENSG00000067533	1	218458629	218511325	N	N	N	5	849	37.64
TGFB2	ENSG00000092969	1	218519577	218617961	Y	N	N	8	1329	41.85
C1orf143	ENSG00000228208	1	218683438	218699320	N	N	N	3	312	40.57
LYPLAL1	ENSG00000143353	1	219347186	219386207	N	N	N	5	714	33.96
SLC30A10	ENSG00000196660	1	219858769	220131989	N	N	N	4	1458	39.84
EPRS	ENSG00000136628	1	220141943	220220000	N	N	N	32	4539	38.15
BPNT1	ENSG00000162813	1	220230824	220263804	N	N	N	10	927	40.42
IARS2	ENSG00000067704	1	220267444	220321380	N	N	N	23	3039	39.21
RAB3GAP2	ENSG00000118873	1	220321635	220445796	N	N	N	35	4182	37.8
AC096644.1	ENSG00000224867	1	220603286	220608023	N	N	N	3	153	41.58
MARK1	ENSG00000116141	1	220701568	220837803	N	N	Y	18	2388	37.08
C1orf115	ENSG00000162817	1	220863187	220872499	N	N	Y	2	429	48.31
2012-03-02	ENSG00000117791	1	220921567	220958150	N	N	N	8	1008	44.02
2012-03-01	ENSG00000186205	1	220960101	220987735	N	N	N	7	1014	45.15
HLX	ENSG00000136630	1	221051699	221059124	Y	N	N	4	1467	54.83
DUSP10	ENSG00000143507	1	221874766	221915518	N	Y	N	4	1449	41.35
HHIPL2	ENSG00000143512	1	222695602	222721445	N	N	N	9	2175	43.76
TAF1A	ENSG00000143498	1	222731244	222763275	N	N	N	11	1353	36.34
MIA3	ENSG00000154305	1	222791428	222841354	N	N	N	28	5724	39.15
AIDA	ENSG00000186063	1	222841355	222886552	N	N	N	10	921	38.46
BROX	ENSG00000162819	1	222885895	222908538	N	N	N	13	1236	36.81
FAM177B	ENSG00000197520	1	222910549	222924147	N	N	N	6	477	39.61
DISP1	ENSG00000154309	1	222988406	223179337	N	N	N	8	4575	37.24
TLR5	ENSG00000187554	1	223282748	223316624	N	Y	N	6	2577	46.61
SUSD4	ENSG00000143502	1	223394161	223537544	N	N	Y	8	1473	44.23
C1orf65	ENSG00000178395	1	223566715	223568812	N	N	N	1	1872	63.3
CAPN8	ENSG00000203697	1	223711349	223853436	N	Y	N	20	2046	48.27
CAPN2	ENSG00000162909	1	223889295	223963720	Y	N	N	21	2103	48.73
TP53BP2	ENSG00000143514	1	223967601	224033674	Y	N	Y	18	3405	39.79
FBXO28	ENSG00000143756	1	224301789	224349749	N	N	N	5	1107	40.97
DEGS1	ENSG00000143753	1	224363458	224381143	N	N	N	3	972	46.06
NVL	ENSG00000143748	1	224415036	224518089	N	N	N	23	2571	41.59
CNIH4	ENSG00000143771	1	224544552	224567161	N	N	N	5	420	43.22
WDR26	ENSG00000162923	1	224572845	224624735	N	N	N	14	1986	38.39
CNIH3	ENSG00000143786	1	224622362	224928251	N	N	Y	6	483	44.14
DNAH14	ENSG00000185842	1	225083964	225586996	N	N	N	83	13548	37.4
LBR	ENSG00000143815	1	225589204	225616627	Y	N	N	14	1848	41.69
AC092811.1	ENSG00000203691	1	225600404	225602040	N	N	N	1	348	39.46
ENAH	ENSG00000154380	1	225677502	225840844	N	Y	N	15	2454	38.51
SRP9	ENSG00000143742	1	225965531	225978168	N	N	N	3	261	40.55
EPHX1	ENSG00000143819	1	225997794	226033260	N	Y	N	9	1368	50.77
TMEM63A	ENSG00000196187	1	226033237	226070069	N	N	Y	25	2424	51.62
LEFTY1	ENSG00000243709	1	226073982	226099082	Y	N	N	4	1101	50.49
RP4-559A3.7	ENSG00000255835	1	226074396	226111978	N	N	N	8	1080	50.88
PYCR2	ENSG00000143811	1	226107578	226111978	N	N	N	7	963	54.71
LEFTY2	ENSG00000143768	1	226124298	226129189	Y	N	N	4	1101	56.28
C1orf55	ENSG00000143751	1	226170403	226187032	N	N	N	7	1356	40.61
H3F3A	ENSG00000163041	1	226249552	226259702	Y	N	N	4	411	44.56
ACBD3	ENSG00000182827	1	226332380	226374431	N	N	N	8	1587	41.45
MIXL1	ENSG00000185155	1	226411319	226414785	Y	N	N	2	723	50.74
LIN9	ENSG00000183814	1	226418850	226497570	Y	N	N	15	1842	39.7
PARP1	ENSG00000143799	1	226548392	226595780	Y	N	N	23	3045	46.8
C1orf95	ENSG00000203685	1	226736501	226796915	N	N	Y	4	426	49.66
ITPKB	ENSG00000143772	1	226819391	226927024	N	Y	N	7	2841	49.82
PSEN2	ENSG00000143801	1	227057885	227083806	N	Y	N	11	1446	52.42
ADCK3	ENSG00000163050	1	227085237	227175246	N	N	N	15	1944	49.11
CDC42BPA	ENSG00000143776	1	227177566	227506175	N	N	Y	37	5346	36.66
ZNF678	ENSG00000181450	1	227751236	227847594	N	N	N	4	1743	40.44
SNAP47	ENSG00000143740	1	227916240	227968927	N	N	N	5	1395	53.99
JMJD4	ENSG00000081692	1	227918126	227923112	N	N	N	6	1392	61.26
PRSS38	ENSG00000185888	1	228003394	228034171	N	N	N	5	981	42.65
WNT9A	ENSG00000143816	1	228106357	228135631	Y	N	N	4	1098	57.27
WNT3A	ENSG00000154342	1	228194752	228248961	Y	N	N	5	1158	52.48
ARF1	ENSG00000143761	1	228270361	228286912	N	N	Y	5	546	52.33
C1orf35	ENSG00000143793	1	228288427	228293112	N	N	N	8	792	60.86
MRPL55	ENSG00000162910	1	228294380	228297013	N	N	N	6	495	56.68
GUK1	ENSG00000143774	1	228327663	228336685	N	N	Y	8	818	61.76
GJC2	ENSG00000198835	1	228337553	228347527	N	Y	N	2	1320	62.41
C1orf148	ENSG00000203684	1	228351787	228353213	N	N	N	2	333	52.98
IBA57	ENSG00000181873	1	228353516	228369958	N	N	N	3	1071	54.59
C1orf145	ENSG00000162913	1	228391207	228401365	N	N	N	4	477	60.11
OBSCN	ENSG00000154358	1	228395831	228566575	N	Y	N	113	26037	53.87
TRIM11	ENSG00000154370	1	228581377	228594541	N	N	N	6	1407	56.97
TRIM17	ENSG00000162931	1	228595641	228604562	N	N	Y	6	1434	56.75
HIST3H3	ENSG00000168148	1	228612546	228613026	N	N	N	1	411	63.41
HIST3H2A	ENSG00000181218	1	228645065	228645560	N	N	N	1	393	65.73
HIST3H2BB	ENSG00000196890	1	228645808	228646259	N	N	N	1	381	60.18
RNF187	ENSG00000168159	1	228674762	228683467	N	N	Y	4	381	56.59
BTNL10	ENSG00000215811	1	228698126	228700004	N	N	N	3	693	53.59
RHOU	ENSG00000116574	1	228870824	228882416	N	N	N	3	777	46.54
TMEM78	ENSG00000177800	1	229385383	229387557	N	N	N	1	411	44.55
RAB4A	ENSG00000168118	1	229406822	229441641	N	N	Y	8	657	41.31
SPHAR	ENSG00000213029	1	229440129	229441248	N	N	N	1	192	33.3
CCSAP	ENSG00000154429	1	229456758	229479041	N	N	N	3	813	43.59
ACTA1	ENSG00000143632	1	229566992	229569845	Y	N	N	7	1134	62.54
NUP133	ENSG00000069248	1	229577045	229644103	Y	N	N	26	3471	40.19
ABCB10	ENSG00000135776	1	229652329	229694442	N	N	N	13	2217	43.62
TAF5L	ENSG00000135801	1	229728858	229761794	N	N	N	5	1770	41.9
URB2	ENSG00000135763	1	229761981	229795946	N	N	N	10	4575	43.59
GALNT2	ENSG00000143641	1	230193536	230417870	N	N	N	16	1716	45.95
PGBD5	ENSG00000177614	1	230457392	230561475	N	N	Y	9	1665	48.08
COG2	ENSG00000135775	1	230778235	230829728	N	N	N	18	2217	39.42
AGT	ENSG00000135744	1	230838269	230850043	Y	N	N	5	1458	53.69
CAPN9	ENSG00000135773	1	230883130	230937749	N	Y	Y	20	2073	47.85
C1orf198	ENSG00000119280	1	230972865	231005335	N	N	Y	4	984	47.8
TTC13	ENSG00000143643	1	231041989	231114621	N	N	N	23	2583	39.73
ARV1	ENSG00000173409	1	231114727	231136341	N	N	N	6	875	41.75
FAM89A	ENSG00000182118	1	231154704	231175992	N	N	N	2	555	47.02
TRIM67	ENSG00000119283	1	231297858	231357302	N	N	N	10	2352	48.93
C1orf131	ENSG00000143633	1	231359509	231376933	N	N	N	7	882	43.5
GNPAT	ENSG00000116906	1	231376953	231413719	N	Y	N	16	2043	41.77
EXOC8	ENSG00000116903	1	231468480	231473598	N	N	N	1	2178	43.15
SPRTN	ENSG00000010072	1	231472850	231490769	N	N	N	5	1470	41.57
EGLN1	ENSG00000135766	1	231499497	231560790	Y	N	N	5	1281	39.65
TSNAX	ENSG00000116918	1	231664287	231702270	N	N	N	6	873	37.77
DISC1	ENSG00000162946	1	231762561	232177018	N	Y	N	13	2565	42.18
SIPA1L2	ENSG00000116991	1	232533711	232697304	N	N	Y	22	5169	41.11
KIAA1383	ENSG00000212916	1	232940643	232946092	N	N	N	1	3144	39.61
NTPCR	ENSG00000135778	1	233086351	233114548	N	N	N	5	687	41.95
PCNXL2	ENSG00000135749	1	233119881	233431459	N	N	Y	34	6414	40.86
RP5-862P8.2	ENSG00000143674	1	233463514	233520894	N	N	N	10	3111	39.87
KCNK1	ENSG00000135750	1	233749750	233808258	N	N	Y	3	1011	42.16
SLC35F3	ENSG00000183780	1	234040679	234460262	N	N	N	8	1473	42.36
C1orf31	ENSG00000168275	1	234509202	234519795	N	N	N	3	468	44.99
TARBP1	ENSG00000059588	1	234527059	234614849	N	N	N	30	4866	40.27
IRF2BP2	ENSG00000168264	1	234740015	234745271	N	N	N	2	1764	48.01
TOMM20	ENSG00000173726	1	235272651	235292251	N	N	N	5	438	41.67
RBM34	ENSG00000188739	1	235294498	235324772	N	N	N	11	1293	44.48
ARID4B	ENSG00000054267	1	235294949	235491534	Y	N	N	24	3939	39.95
GGPS1	ENSG00000152904	1	235490665	235507847	N	N	Y	4	903	43.09
TBCE	ENSG00000116957	1	235530675	235612283	N	Y	N	18	1737	44.4
B3GALNT2	ENSG00000162885	1	235613238	235667781	N	N	N	12	1503	40.37
GNG4	ENSG00000168243	1	235710987	235814054	N	N	N	3	228	48.07
LYST	ENSG00000143669	1	235824341	236046940	N	Y	N	53	11406	37.77
NID1	ENSG00000116962	1	236139130	236228462	N	Y	N	20	3744	44.98
GPR137B	ENSG00000077585	1	236305832	236385165	N	N	Y	7	1200	43.62
ERO1LB	ENSG00000086619	1	236378855	236445319	N	Y	N	16	1404	37.49
EDARADD	ENSG00000186197	1	236511562	236648026	Y	N	N	6	648	44.64
LGALS8	ENSG00000116977	1	236681300	236716281	N	Y	N	11	1080	43.48
HEATR1	ENSG00000119285	1	236712305	236767804	N	N	N	45	6435	38.51
ACTN2	ENSG00000077522	1	236849754	236927931	N	N	Y	21	2685	43.06
MTR	ENSG00000116984	1	236958610	237067281	Y	N	N	33	3798	40.72
RYR2	ENSG00000198626	1	237205505	238129359	Y	N	Y	107	14922	38.91
ZP4	ENSG00000116996	1	238045705	238054094	N	N	N	12	1623	46.45
CHRM3	ENSG00000133019	1	239549865	240078750	N	Y	Y	5	1773	38.67
FMN2	ENSG00000155816	1	240177648	240638489	N	Y	Y	18	5169	39.28
GREM2	ENSG00000180875	1	240652873	240775449	N	N	N	2	507	40.58
RGS7	ENSG00000182901	1	240931554	241520530	N	Y	Y	17	1488	39.15
FH	ENSG00000091483	1	241660903	241683061	Y	N	N	10	1533	36.87
KMO	ENSG00000117009	1	241695434	241758944	N	N	N	15	1461	38
OPN3	ENSG00000054277	1	241753404	241840678	N	N	N	4	1209	39.62
CHML	ENSG00000203668	1	241792155	241799232	N	N	N	1	1971	34.95
WDR64	ENSG00000162843	1	241815580	241965435	N	N	N	27	3246	38.51
EXO1	ENSG00000174371	1	242011269	242058450	N	Y	N	14	2541	39.58
MAP1LC3C	ENSG00000197769	1	242158792	242162375	N	N	N	4	444	49.02
PLD5	ENSG00000180287	1	242251689	242687998	N	N	N	10	1611	40.39
CEP170	ENSG00000143702	1	243287730	243418650	N	N	Y	20	4755	36.28
SDCCAG8	ENSG00000054282	1	243419320	243663394	N	N	N	18	2142	39.81
AKT3	ENSG00000117020	1	243651535	244014381	N	Y	Y	13	1440	37.34
ZNF238	ENSG00000179456	1	244214585	244220778	Y	N	Y	2	1596	40.26
C1orf100	ENSG00000173728	1	244515937	244552965	N	N	N	5	444	44.83
ADSS	ENSG00000035687	1	244571796	244615436	N	N	N	13	1371	38.3
C1orf101	ENSG00000179397	1	244617679	244804479	N	N	N	22	2856	39.42
DESI2	ENSG00000121644	1	244816237	244872335	N	N	N	5	585	40.41
COX20	ENSG00000203667	1	244998624	245008359	N	N	N	5	393	39.53
HNRNPU	ENSG00000153187	1	245014468	245027844	Y	N	N	14	2478	40.52
EFCAB2	ENSG00000203666	1	245133007	245290466	N	N	N	8	810	42.37
KIF26B	ENSG00000162849	1	245318287	245872733	Y	N	N	15	6327	44.8
SMYD3	ENSG00000185420	1	245912642	246670614	N	N	N	12	1287	40.6
TFB2M	ENSG00000162851	1	246703862	246729626	N	N	N	8	1191	41.96
CNST	ENSG00000162852	1	246729746	246831886	N	N	N	11	2178	41.32
SCCPDH	ENSG00000143653	1	246887349	246931439	N	N	Y	12	1290	41.94
RP11-439E19.8	ENSG00000223519	1	246939531	246952963	N	N	N	10	809	51.03
AHCTF1	ENSG00000153207	1	247002400	247095280	Y	N	N	36	6906	38.75
ZNF695	ENSG00000197472	1	247108849	247171395	N	N	N	4	1548	42.51
ZNF670	ENSG00000135747	1	247108849	247242113	N	N	N	4	1170	42.2
ZNF669	ENSG00000188295	1	247261406	247267674	N	N	N	4	1395	42.94
C1orf229	ENSG00000221953	1	247273462	247275719	N	N	N	1	714	64.53
ZNF124	ENSG00000196418	1	247285277	247335318	N	N	N	4	1056	42.19
ZNF496	ENSG00000162714	1	247460714	247495148	N	N	N	10	1872	48.34
NLRP3	ENSG00000162711	1	247579458	247612410	N	Y	N	11	3111	46.68
OR2B11	ENSG00000177535	1	247614255	247615308	N	N	N	1	954	54.84
C1orf150	ENSG00000169224	1	247670360	247740992	N	N	N	5	408	40.49
OR2C3	ENSG00000196242	1	247693434	247697141	N	N	N	2	963	47.52
OR2G2	ENSG00000177489	1	247751662	247752615	N	N	N	1	954	48.43
OR2G3	ENSG00000177476	1	247768856	247769838	N	N	N	1	930	46.69
[truncated: 18,030 more rows]
