# Supplementary material for: From Mouse to Human: Evolutionary Genomics Analysis of Human Orthologs of Essential Genes
Source: PLoS Genet. 2013 May 9;9(5):e1003484. doi: 10.1371/journal.pgen.1003484 (PMC3649967; doi:10.1371/journal.pgen.1003484)
Supplement: Table S3 — Wilcoxon test P-values for comparisons of the gene length corrected incidence of exonic missense variants in essential, non-essential and all genes. Results are given for the 14 1000 Genomes subpopulations, the four continental populations (African, American, Asian, European) and all samples. For each population a significant reduction in exonic missense variants in essential genes is observed. (DOC) [file pgen.1003484.s019.doc]

| 1000G Population | Missense variants  (EG vs NLG) | Missense variants  (EG vs ALL) | Missense variants  (NLG vs ALL) |
| --- | --- | --- | --- |
| Colombians (CLM) | 3.63 x 10-33 | 2.08 x 10-63 | 0.0001269 |
| Han Chinese (CHB) | 2.73 x 10-29 | 3.04 x 10-48 | 0.023 |
| Americans of African Ancestry (ASW) | 2.26 x 10-41 | 6.45 x 10-79 | 9.61 x 10-6 |
| Yoruba, Nigera (YRI) | 2.54 x 10-45 | 4.58 x 10-83 | 2.55 x 10-5 |
| Toscani, Italy (TSI) | 2.09 x 10-36 | 3.37 x 10-57 | 0.0382 |
| Mexican Ancestry (MXL) | 7.09 x 10-38 | 1.89 x 10-64 | 0.00269 |
| Luhya, Kenia (LWK) | 6.43 x 10-44 | 9.07 x 10-83 | 1.05 x 10-5 |
| Utah Residents, European ancestry (CEU) | 2.36 x 10-29 | 5.84 x 10-53 | 0.001649 |
| Southern Han Chinese (CHS) | 6.98 x 10-29 | 9.09 x 10-46 | 0.0536 |
| British in England and Scotland (GBR) | 6.55 x 10-35 | 9.29 x 10-55 | 0.0418 |
| Iberian population, Spain (IBS) | 1.93 x 10-20 | 6.37 x 10-37 | 0.00365 |
| Finnish (FIN) | 1.31 x 10-28 | 2.33 x 10-49 | 0.00415 |
| Japanese (JPT) | 2.34 x 10-30 | 2.4 x 10-48 | 0.0228 |
| Puerto Ricans (PUR) | 3.08 x 10-35 | 3.31 x 10-62 | 0.000854 |
| African (AFR) | 1.92 x 10-50 | 5.32 x 10-90 | 0.00018 |
| American (AMR) | 1.94 x 10-46 | 2.4 x 10-78 | 0.0019 |
| Asian (ASN) | 5.53 x 10-38 | 5.11 x 10e-52 | 0.423 |
| European (EUR) | 2.21 x 10-44 | 2.49 x 10-64 | 0.198 |
| All | 1.08 x 10-59 | 1.56 x 10e-84 | 0.309 |
